# Supplementary material for: Organocatalytic enantioselective aza-Henry reaction of ketimines derived from isatins: access to optically active 3-amino-2-oxindoles
Source: Royal Society of Chemistry journal article supplement (doi:10.1039/c4ra00902a), 2014-01-01
Supplement: c4ra00902a1.pdf [file c4ra00902a1.pdf]

*Supporting Information*

**Organocatalytic Enantioselective *aza*-Henry reaction of Ketimines Derived from Isatins: Access to Optically Active 3-Aminooxindoles**

Akshay Kumar, Jasneet Kaur, Swapandeep Singh Chimni\*, Amanpreet Kaur

Department of Chemistry, U.G.C. Centre of Advance Studies in Chemistry, Guru Nanak Dev University, Amritsar, 143005, India, Fax: (+)91-183-2258820

E-mail: [sschimni@yahoo.com](mailto:sschimni@yahoo.com), [sschimni.chem@gndu.ac.in](mailto:sschimni.chem@gndu.ac.in)

**Table of Contents**

|                                                          |       |
|----------------------------------------------------------|-------|
| General Note and procedure                               | 2     |
| Spectral data                                            | 3-9   |
| Copies of HPLC chromatograph                             | 10-23 |
| Copies of <sup>1</sup> H and <sup>13</sup> C NMR spectra | 24-51 |

## **General Note**

All reactions were performed in oven-dried glassware. All solvents and commercially available chemical were used without further purification. The molecular sieves were activated at 200 °C for 2 hours in an oven. The column chromatography was carried out on a column packed with silica gel 60-120. <sup>1</sup>H NMR spectra were recorded in CDCl<sub>3</sub> on a BRUKER AVANCE III (500 MHz), JNM-ECS400 (400 MHz), BRUKER AVANCE II (400 MHz) and JEOL (300 MHz) spectrometer. <sup>13</sup>C NMR spectra were recorded in CDCl<sub>3</sub> on BRUKER AVANCE III (125 MHz), JNM- ECS400 (100 MHz), BRUKER AVANCE II (100 MHz) and JEOL (75 MHz). Chemical shifts (δ) are expressed in ppm downfield from internal TMS. MS were recorded on microTOF-Q II 10356 Mass Spectrometer. Optical rotation was determined with AUTOPOL IV polarimeter at 25 °C using sodium D light. HPLC analyses were performed on a Shimadzu LC-20AD using Daicel Chiralpak OD-H, IA, IB and AS-H columns.

## **General Procedure**

To the solution of ketimines derived from isatins (0.1 mmol), nitroalkane (0.25 mmol), 4Å MS (50 mg) in 0.3 mL of THF, the catalyst BnCPN (**VI**, 20 mol%) was added at 25 °C. The reaction mixture was stirred for 24 hours and the progress of the reaction was monitored at regular intervals by thin layer chromatography (tlc). After the completion of reaction, the crude reaction mixture was purified by column chromatography on silica gel (mesh 60–120) using hexane–ethyl acetate (1:1) as eluent. The enantiomeric excess of the purified **3** were determined using Diacel Chiralpak columns. The racemic standards were prepared using triethylamine (20 mol%) as a catalyst.

**(R)-tert-Butyl 1-benzyl-3-(nitromethyl)-2-oxoindolin-3-ylcarbamate (3a)**

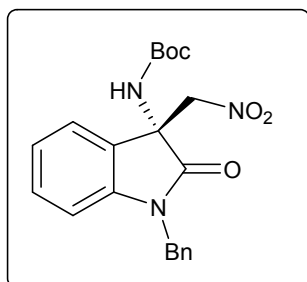

Orange oil; 80% yield;  $[\alpha]_{20}^D = -6.79$  (*c* 0.25, CHCl<sub>3</sub>); 84% ee; HPLC [Chiralpak OD-H, hexane/*i*-PrOH, 90:10, 1 mL/min, 254 nm,  $t_R = 16.3$  min (major) and  $t_R = 29.3$  min (minor)]; <sup>1</sup>H NMR (500 MHz, CDCl<sub>3</sub>)  $\delta$  7.28-7.76 (m, 8H), 6.65 (d, *J* = 10.0 Hz, 1H), 5.94 (s, 1H), 4.90-5.04 (m, 3H), 4.69 (d, *J* = 15.0 Hz, 1H), 1.41 (s, 9H); <sup>13</sup>C NMR (125 MHz, CDCl<sub>3</sub>)  $\delta$  28.13, 44.56, 59.91, 77.80, 81.32, 109.9, 123.5, 124.5, 125.8, 127.4, 127.9, 128.9, 130.3, 135.0, 142.5, 153.7, 172.8; HRMS calcd. for C<sub>21</sub>H<sub>23</sub>N<sub>3</sub>O<sub>5</sub> [M+Na]<sup>+</sup> 404.1263; found 404.1233.

**(R)-tert-Butyl 1-benzyl-5-chloro-3-(nitromethyl)-2-oxoindolin-3-ylcarbamate (3b)**

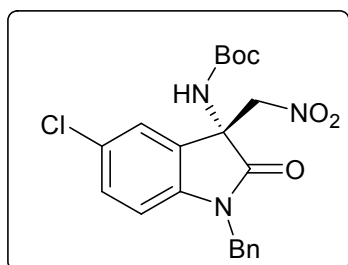

Yellow semi-solid; yield 74%;  $[\alpha]_{20}^D = -8.79$  (*c* 0.25, CHCl<sub>3</sub>); 67% ee; [Chiralpak OD-H, hexane/*i*-PrOH, 90:10, 1 mL/min, 254 nm,  $t_R = 8.83$  min (minor) and  $t_R = 9.38$  min (major)]; <sup>1</sup>H NMR (500 MHz, CDCl<sub>3</sub>)  $\delta$  7.23-7.48 (m, 7H), 6.70 (d, *J* = 10.0 Hz, 1H), 5.93 (s, 1H), 4.90-5.05 (m, 3H), 4.69 (d, *J* = 15.0 Hz, 1H), 1.41 (s, 9H); <sup>13</sup>C NMR (125 MHz, CDCl<sub>3</sub>)  $\delta$  28.15, 44.69, 59.81, 77.46, 81.68, 111.0, 125.1, 127.3, 128.0, 129.0, 130.3, 134.6, 141.1, 172.5; HRMS calcd. for C<sub>21</sub>H<sub>22</sub>ClN<sub>3</sub>O<sub>5</sub> [M+Na]<sup>+</sup> 454.1146; found 454.1167.

**(R)-tert-Butyl 1-benzyl-5-bromo-3-(nitromethyl)-2-oxoindolin-3-ylcarbamate (3c)**

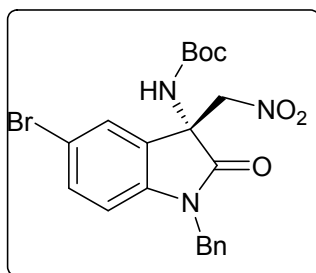

Orange semi-solid; 79% yield;  $[\alpha]_{20}^D = -9.19$  (c 0.25,  $\text{CHCl}_3$ ); 73% ee; HPLC [Chiralpak OD-H, hexane/i-PrOH, 90:10, 1 mL/min, 254 nm,  $t_R = 13.6$  min (minor) and  $t_R = 15.6$  min (major)];  $^1\text{H}$  NMR (500 MHz,  $\text{CDCl}_3$ )  $\delta$  7.28-7.61 (m, 7H), 6.65 (d,  $J = 10.0$  Hz, 1H), 5.94 (s, 1H), 4.90-5.04 (m, 3H), 4.68 (d,  $J = 15.0$  Hz, 1H), 1.41 (s, 9H);  $^{13}\text{C}$  NMR (125 MHz,  $\text{CDCl}_3$ )  $\delta$  28.15, 44.66, 59.74, 77.47, 81.70, 111.5, 116.2, 127.3, 127.7, 127.8, 128.1, 129.0, 133.2, 134.5, 141.6, 153.7, 172.4; HRMS calcd. for  $\text{C}_{21}\text{H}_{22}\text{BrN}_3\text{O}_5$   $[\text{M}+\text{Na}]^+$  498.0635; found 498.0664.

**(R)-tert-Butyl 1-benzyl-5-iodo-3-(nitromethyl)-2-oxoindolin-3-ylcarbamate (3d)**

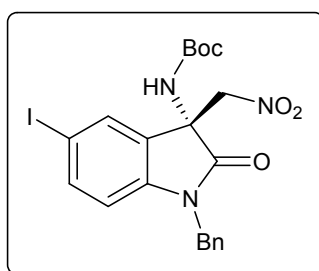

Yellow semi solid; yield 77%;  $[\alpha]_{20}^D = -8.79$  (c 0.25,  $\text{CHCl}_3$ ); 72% ee; [Chiralpak OD-H, hexane/i-PrOH, 90:10, 1 mL/min, 254 nm,  $t_R = 13.6$  min (minor) and  $t_R = 23.8$  min (major)];  $^1\text{H}$  NMR (300 MHz,  $\text{CDCl}_3$ )  $\delta$  7.28-7.74 (m, 7H), 6.55 (d,  $J = 9.0$  Hz, 1H), 5.95 (s, 1H), 4.87-5.04 (m, 3H), 4.66 (d,  $J = 12.0$  Hz, 1H), 1.41 (s, 9H);  $^{13}\text{C}$  NMR (125 MHz,  $\text{CDCl}_3$ )  $\delta$  28.16, 44.61, 59.56, 77.51, 81.70, 86.02, 112.0, 127.3, 128.1, 128.9, 133.1, 134.5, 139.2, 142.2, 153.7, 172.2; HRMS calcd. for  $\text{C}_{21}\text{H}_{22}\text{IN}_3\text{O}_5$   $[\text{M}+\text{Na}]^+$  546.0496; found 546.0545.

**(R)-tert-Butyl 1-allyl-3-(nitromethyl)-2-oxoindolin-3-ylcarbamate (3e)**

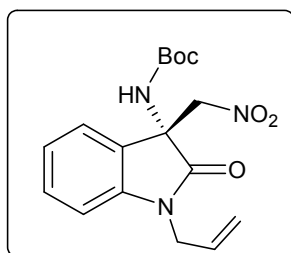

Yellow semi solid; yield 73%;  $[\alpha]_{20}^D = -6.79$  (c 0.25,  $\text{CHCl}_3$ ); 70% ee; [Chiralpak OD-H, hexane/*i*-PrOH, 90:10, 1 mL/min, 254 nm,  $t_R = 12.6$  min (minor) and  $t_R = 13.9$  min (major)];  $^1\text{H}$  NMR (500 MHz,  $\text{CDCl}_3$ )  $\delta$  7.28-7.63 (m, 3H), 6.80 (d,  $J = 5.0$  Hz, 1H), 5.81-5.87 (m, 2H), 5.31-5.38 (m, 2H), 5.01 (d,  $J = 15.0$  Hz, 1H), 4.66 (d,  $J = 15.0$  Hz, 1H), 4.32-4.44 (m, 2H), 1.40 (s, 9H);  $^{13}\text{C}$  NMR (125 MHz,  $\text{CDCl}_3$ )  $\delta$  28.12, 43.03, 59.77, 77.76, 81.24, 109.8, 118.3, 123.4, 130.3, 130.7, 142.6, 172.5; HRMS calcd. for  $\text{C}_{17}\text{H}_{21}\text{N}_3\text{O}_5$   $[\text{M} + \text{Na}]^+$  370.1378; found 370.1389.

**(*R*)-*tert*-Butyl 1-allyl-5-chloro-3-(nitromethyl)-2-oxoindolin-3-ylcarbamate (3f)**

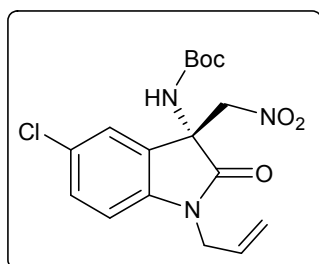

Yellow oil; yield 76%;  $[\alpha]_{20}^D = -9.03$  (c 0.25,  $\text{CHCl}_3$ ); 76% ee; [Chiralpak OD-H, hexane/*i*-PrOH, 90:10, 1 mL/min, 254 nm,  $t_R = 9.67$  min (major) and  $t_R = 10.5$  min (minor)];  $^1\text{H}$  NMR (500 MHz,  $\text{CDCl}_3$ )  $\delta$  7.28-7.51 (m, 2H), 6.84 (d,  $J = 10.0$  Hz, 1H), 5.83-5.86 (m, 2H), 5.29-5.38 (m, 2H), 5.02 (d,  $J = 15.0$  Hz, 1H), 4.66 (d,  $J = 10.0$  Hz, 1H), 4.32-4.47 (m, 2H), 1.40 (s, 9H);  $^{13}\text{C}$  NMR (125 MHz,  $\text{CDCl}_3$ )  $\delta$  28.13, 43.14, 59.66, 77.41, 81.62, 110.9, 118.5, 125.2, 127.4, 128.9, 130.3, 141.2, 153.7, 172.2; HRMS calcd. for  $\text{C}_{17}\text{H}_{20}\text{ClN}_3\text{O}_5$   $[\text{M} + \text{Na}]^+$  404.0984; found 404.0996.

**(*R*)-*tert*-Butyl 1-allyl-5-bromo-3-(nitromethyl)-2-oxoindolin-3-ylcarbamate (3g)**

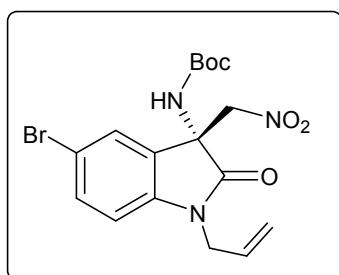

White solid; yield 77%;  $[\alpha]_{20}^D = -9.99$  (c 0.25,  $\text{CHCl}_3$ ); 73% ee; [Chiralpak OD-H, hexane/*i*-PrOH, 90:10, 1 mL/min, 254 nm,  $t_R = 12.4$  min (minor) and  $t_R = 13.5$  min (major)];  $^1\text{H}$  NMR (300 MHz,  $\text{CDCl}_3$ )  $\delta$  7.46-7.60 (m, 2H), 6.78 (d,  $J = 8.4$  Hz, 1H), 5.79-5.85 (m, 2H), 5.28 (d,  $J = 11.1$  Hz, 2H), 4.98 (d,  $J = 12.3$  Hz, 1H), 4.63 (d,  $J = 12.6$  Hz, 1H), 4.29-4.47 (m, 2H), 1.37 (s, 9H);  $^{13}\text{C}$  NMR (125 MHz,  $\text{CDCl}_3$ )  $\delta$  28.13, 43.14, 59.66, 77.41, 81.61,

110.9, 118.5, 125.2, 127.4, 128.9, 130.3, 141.2, 153.7, 172.2; HRMS calcd. for  $C_{17}H_{20}BrN_3O_5$   $[M + Na]^+$  448.0479; found 448.0502

**(R)-tert-Butyl 1-allyl-5-iodo-3-(nitromethyl)-2-oxoindolin-3-ylcarbamate (3h)**

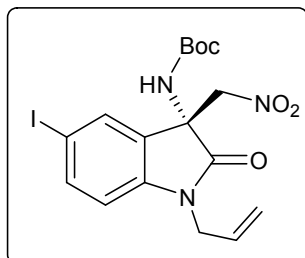

Yellow oil; yield 78%;  $[\alpha]_{20}^{D=}$  - 7.99 (c 0.25,  $CHCl_3$ ); 89% ee; HPLC [Chiralpak IB, hexane/i-PrOH, 90:10, 1 mL/min, 254 nm,  $t_R$  = 10.1 min (minor) and  $t_R$  = 15.4 min (major)];  $^1H$  NMR (300 MHz,  $CDCl_3$ )  $\delta$  7.26-7.75 (m, 2H), 6.67 (d, J = 9.0 Hz, 1H), 5.79-5.87 (m, 2H), 5.25-5.77 (m, 2H), 4.95 (d, J = 12.0 Hz, 1H), 4.61 (d, J = 12.0 Hz, 1H), 4.28-4.44 (m, 2H), 1.37 (s, 9H);  $^{13}C$  NMR (125 MHz,  $CDCl_3$ )  $\delta$  28.13, 43.05, 50.90, 59.41, 77.46, 81.64, 85.89, 111.9, 118.5, 128.0, 130.3, 133.2, 139.2, 142.4, 171.8; HRMS calcd. for  $C_{17}H_{20}IN_3O_5$   $[M+Na]^+$  496.0345; found 496.0370

**(R)-tert-Butyl 5-chloro-1-(2-methylallyl)-3-(nitromethyl)-2-oxoindolin-3-ylcarbamate (3i)**

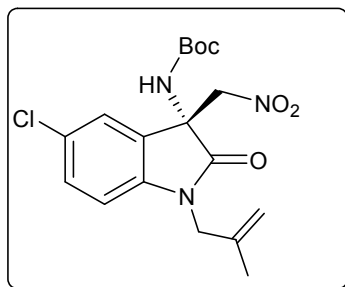

Yellow oil; yield 71%;  $[\alpha]_{20}^{D=}$  - 11.6 (c 0.25,  $CHCl_3$ ); 75% ee; HPLC [Chiralpak OD-H, hexane/i-PrOH, 90:10, 1 mL/min, 254 nm,  $t_R$  = 7.34 min (minor) and  $t_R$  = 8.24 min (major)];  $^1H$  NMR (300 MHz,  $CDCl_3$ )  $\delta$  7.26-7.47 (m, 2H), 6.83 (d, J = 9.0 Hz, 1H), 5.85 (s, 1H), 4.93-4.98 (m, 3H), 4.63 (d, J = 12.0 Hz, 1H), 4.21-4.38 (m, 2H), 1.77 (s, 3H), 1.37 (s, 9H);  $^{13}C$  NMR (125 MHz,  $CDCl_3$ )  $\delta$  19.90, 28.13, 46.78, 50.90, 59.71, 77.43, 81.61, 111.0, 113.5, 125.1, 127.4, 128.9, 130.3, 138.2, 141.4, 172.2; HRMS calcd. for  $C_{18}H_{22}ClN_3O_5$   $[M+Na]^+$  418.1140; found 418.1156

**(R)-tert-Butyl 1-((E)-but-2-enyl)-5-chloro-3-(nitromethyl)-2-oxoindolin-3-ylcarbamate (3j)**

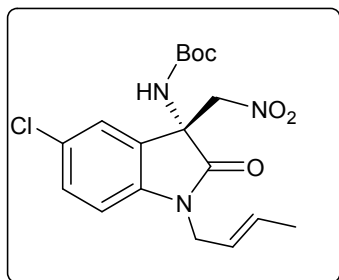

Yellow oil; yield 70%;  $[\alpha]_{20}^D = -7.13$  (c 0.25,  $\text{CHCl}_3$ ); 79% ee; [Chiralpak IB, hexane/i-PrOH, 90:10, 1 mL/min, 254 nm,  $t_R = 6.24$  min (minor) and  $t_R = 6.91$  min (major)];  $^1\text{H}$  NMR (500 MHz,  $\text{CDCl}_3$ )  $\delta$  7.32-7.50 (m, 2H), 6.85 (d,  $J = 10.0$  Hz, 1H), 5.85 (s, 1H), 4.97-5.01 (m, 3H), 4.66 (d,  $J = 15.0$  Hz, 1H), 4.33 (dd,  $J = 55.0$  Hz,  $J = 15.0$  Hz, 2H), 1.80 (s, 3H), 1.40 (s, 9H);  $^{13}\text{C}$  NMR (100 MHz,  $\text{CDCl}_3$ )  $\delta$  20.05, 28.26, 46.89, 59.83, 81.74, 111.2, 113.7, 125.2, 127.5, 129.1, 130.5, 138.4, 141.5, 153.8, 172.5; HRMS calcd. for  $\text{C}_{18}\text{H}_{22}\text{ClN}_3\text{O}_5$   $[\text{M}+\text{Na}]^+$  418.1140; found 418.1149

**(R)-tert-Butyl 5-chloro-3-(nitromethyl)-2-oxoindolin-3-ylcarbamate (3k)**

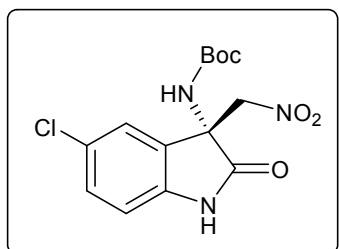

Yellow oil; yield 68% ;  $[\alpha]_{20}^D = +21.4$  (c 0.25,  $\text{CHCl}_3$ ); 74% ee; HPLC [Chiralpak IA, hexane/i-PrOH, 9:1, 1 mL/min, 254 nm,  $t_R = 11.3$  min (major) and  $t_R = 15.6$  min (minor)];  $^1\text{H}$  NMR (300 MHz,  $\text{CDCl}_3$ )  $\delta$  8.48 (s, 1H), 7.26-7.31 (m, 2H), 6.83 (d,  $J = 8.4$  Hz, 1H), 6.19 (s, 1H), 4.75 (dd,  $J = 58.8$  Hz and  $J = 12.6$  Hz, 2H), 1.38 (s, 9H);  $^{13}\text{C}$  NMR (100 MHz,  $\text{CDCl}_3$ )  $\delta$  22.69, 44.00, 55.81, 80.71, 110.5, 112.0, 133.1, 114.8, 115.3, 118.1, 121.6, 127.9, 128.1, 128.9, 129.0, 134.6, 135.3, 136.1, 144.6, 172.0, 183.6; HRMS calcd. for  $\text{C}_{14}\text{H}_{16}\text{ClN}_3\text{O}_5$   $[\text{M}+\text{Na}]^+$  364.0671; found 364.0686

**3(R),1'(R/S)-tert-Butyl 5-chloro-1-(2-methylallyl)-3-(1'-nitroethyl)-2-oxoindolin-3-ylcarbamate (3l)**

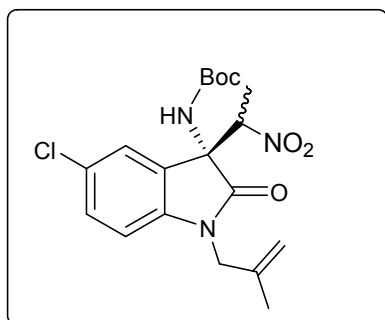

Brown solid; yield 75%;  $[\alpha]_{20}^D = -9.19$  (c 0.25,  $\text{CHCl}_3$ ); dr 72:28; [Chiralpak IA, hexane/i-PrOH, 90:10, 1 mL/min, 254 nm, ee = 80% of major diastereomer and ee = 82% of minor diastereomer,  $t_R = 5.60$  min (major),  $t_R = 8.56$  min (major) and  $t_R = 6.31$  min (minor),  $t_R = 16.3$  min (minor)];  $^1\text{H NMR}$  (500 MHz,  $\text{CDCl}_3$ )  $\delta$  6.82-7.39 (m, 3H), 6.09 (d,  $J = 25.0$  Hz, 1H), 5.00-5.06 (m, 3H), 4.31 (dd,  $J = 65.0$  Hz,  $J = 20.0$  Hz, 2H), 1.74-1.81 (m, 3H), 1.58 (s, 3H), 1.35 (s, 9H);  $^{13}\text{C NMR}$  (125 MHz,  $\text{CDCl}_3$ )  $\delta$  13.19, 20.13, 28.11, 46.68, 62.61, 81.33, 84.56, 110.6, 113.3, 113.6, 123.6, 124.8, 128.7, 130.1, 130.2, 138.5, 142.4, 172.9; HRMS calcd. for  $\text{C}_{19}\text{H}_{24}\text{ClN}_3\text{O}_5$   $[\text{M}+\text{Na}]^+$  432.1297; found 432.1300.

**3(R),1'(R/S)-tert-Butyl-5-chloro-1-(2-methylallyl)-3-(1'-nitropropyl)-2-oxoindolin-3-ylcarbamate (3m)**

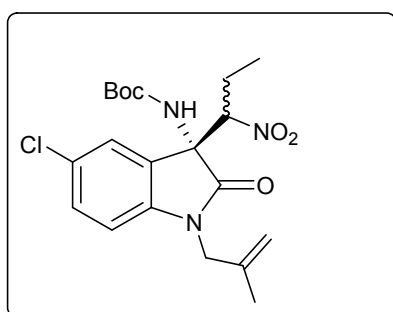

Yellow semi-solid; yield 75%; dr 55:45, [Chiralpak IA, hexane/i-PrOH, 90:10, 1 mL/min, 210 nm, ee = 56% of major diastereomer and ee = 45% of minor diastereomer,  $t_R = 4.72$  min (major),  $t_R = 6.79$  min (major) and  $t_R = 5.16$  min (minor),  $t_R = 8.62$  min (minor)];  $^1\text{H NMR}$  (300 MHz,  $\text{CDCl}_3$ )  $\delta$  7.10-7.30 (m, 2H), 6.80 (d,  $J = 12.3$  Hz, 1H), 6.11 (s, 1H), 4.78-4.98 (m, 3H), 4.77-4.82 (m, 1H), 4.27 (dd,  $J = 33.8$  Hz and  $J = 15.6$  Hz, 2H), 2.16-2.42 (m, 2H), 1.78 (s, 3H), 1.33 (s, 9H), 0.94 (t,  $J = 14.4$  Hz, 3H);  $^{13}\text{C NMR}$  (100 MHz,  $\text{CDCl}_3$ )  $\delta$  10.63, 20.70, 28.08, 46.65, 62.43, 81.40, 91.74, 92.81, 110.7, 112.4, 113.3, 113.6, 123.3, 125.3, 128.6, 128.8, 130.1, 138.4, 141.0, 142.0, 153.4, 171.9, 173.2.



**3(R),1'(R/S)-tert-Butyl 1-allyl-5-iodo-3-(1'-nitropropyl)-2-oxindolin-3-ylcarbamate (3n)**

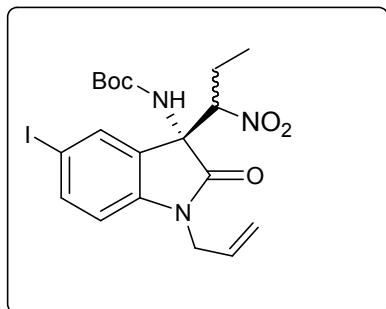

Yellow semi-solid; yield 80%; dr 54:46, [Chiralpak IA, hexane/*i*-PrOH, 90:10, 1 mL/min, 208 nm, ee = 64% of major diastereomer,  $t_R$  = 6.15 min (major),  $t_R$  = 7.63 min (minor); and ee = 67% of minor diastereomer,  $t_R$  = 10.6 min (major)  $t_R$  = 12.5 min (minor)];  $^1\text{H}$  NMR (500 MHz,  $\text{CDCl}_3$ )  $\delta$  7.37-7.68 (m, 3H), 6.66-6.73 (m, 1H), 6.10 (s, 1H), 5.82-5.84 (m, 1H), 5.28-5.40 (m, 2H), 4.27-4.44 (m, 3H), 2.15-2.42 (m, 2H), 1.41 (s, 9H), 0.94-0.99 (m, 3H);  $^{13}\text{C}$  NMR (100 MHz,  $\text{CDCl}_3$ )  $\delta$  10.57, 20.59, 29.71, 43.09, 62.18, 81.46, 85.79, 91.78, 92.62, 111.5, 113.1, 118.7, 119.1, 130.4, 130.6, 131.5, 133.5, 133.9, 138.9, 142.0, 142.9, 153.0, 172.5.

# ==== Shimadzu LCsolution Analysis Report ====

D:\...\N-Boc isatin Schiff base\New Folder\Catalyst Screening\isatinshifbasenitromethan1ml10%AS-HREC1.lcd  
mAU

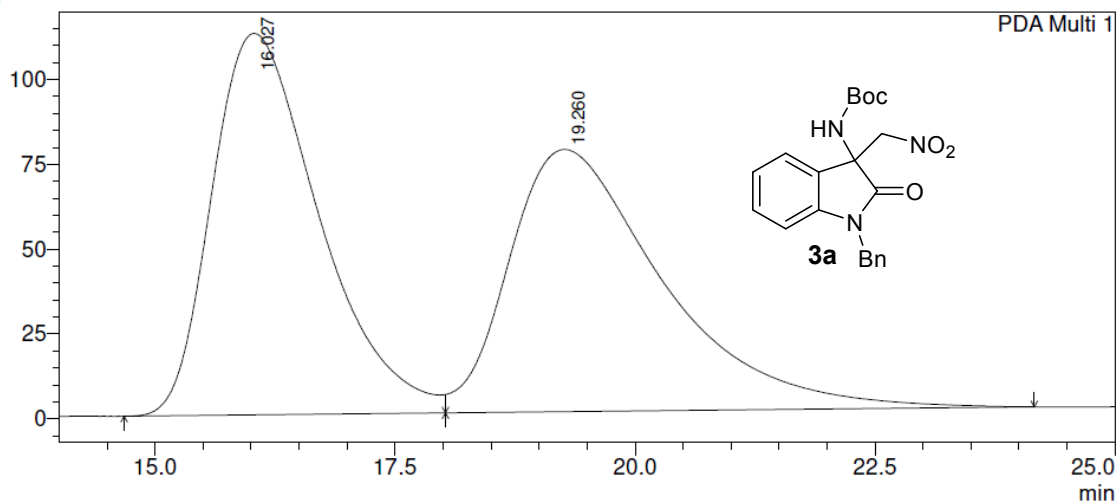

1 PDA Multi 1/254nm 4nm

PeakTable

PDA Ch1 254nm 4nm

| Peak# | Ret. Time | Area     | Height | Area %  | Height % |
|-------|-----------|----------|--------|---------|----------|
| 1     | 16.027    | 8737895  | 112507 | 50.338  | 59.280   |
| 2     | 19.260    | 8620620  | 77281  | 49.662  | 40.720   |
| Total |           | 17358515 | 189788 | 100.000 | 100.000  |

D:\...\N-Boc isatin Schiff base\New Folder\Catalyst Screening\isatinshifbasenitromethan1ml10%AS-BnCPN.lcd  
mAU

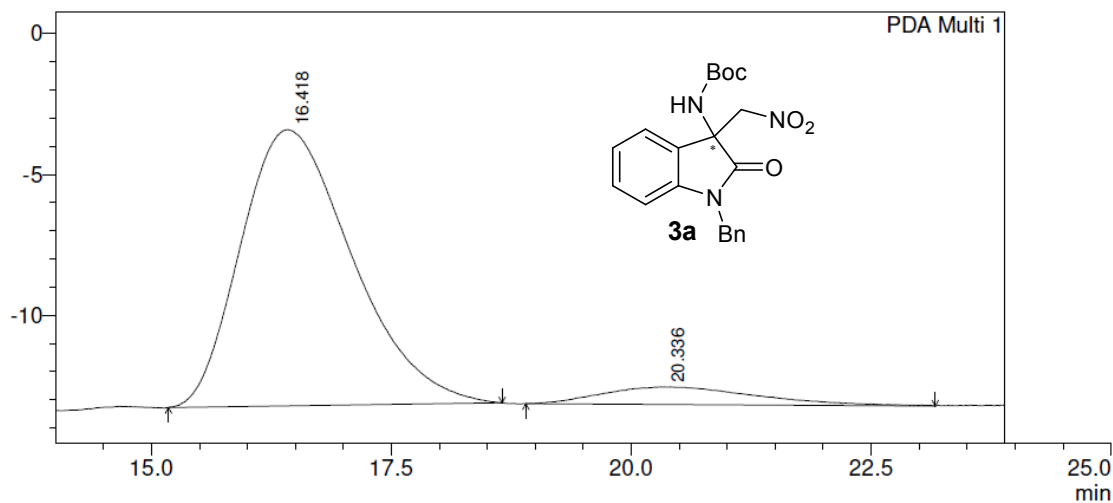

1 PDA Multi 1/254nm 4nm

PeakTable

PDA Ch1 254nm 4nm

| Peak# | Ret. Time | Area   | Height | Area %  | Height % |
|-------|-----------|--------|--------|---------|----------|
| 1     | 16.418    | 792913 | 9812   | 91.932  | 93.996   |
| 2     | 20.336    | 69589  | 627    | 8.068   | 6.004    |
| Total |           | 862501 | 10439  | 100.000 | 100.000  |

# ==== Shimadzu LCsolution Analysis Report ====

D:\HPLC\Akshay\Schff Base derivatives (ch3no2)\Cl-N-benzylissschffbase+CH3NO2, ODH,1ml,10% chiral0004.lcd  
mAU

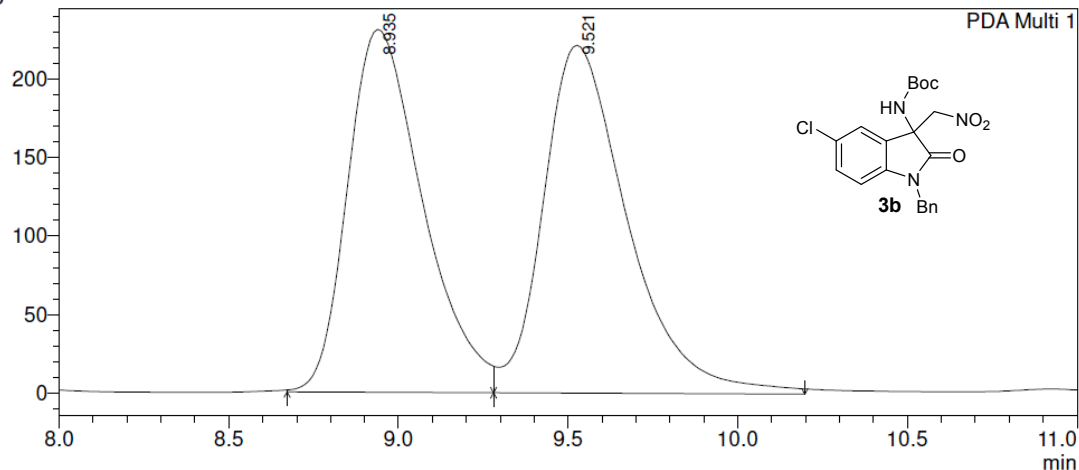

1 PDA Multi 1/254nm 4nm

PeakTable

PDA Ch1 254nm 4nm

| Peak# | Ret. Time | Area    | Height | Area %  | Height % |
|-------|-----------|---------|--------|---------|----------|
| 1     | 8.935     | 3559077 | 230949 | 48.156  | 51.054   |
| 2     | 9.521     | 3831598 | 221410 | 51.844  | 48.946   |
| Total |           | 7390675 | 452359 | 100.000 | 100.000  |

D:\HPLC\Akshay\Schff Base derivatives (ch3no2)\Cl-N-benzylissschffbase+CH3NO2, ODH,1ml,10% chiral0005.lcd  
mAU

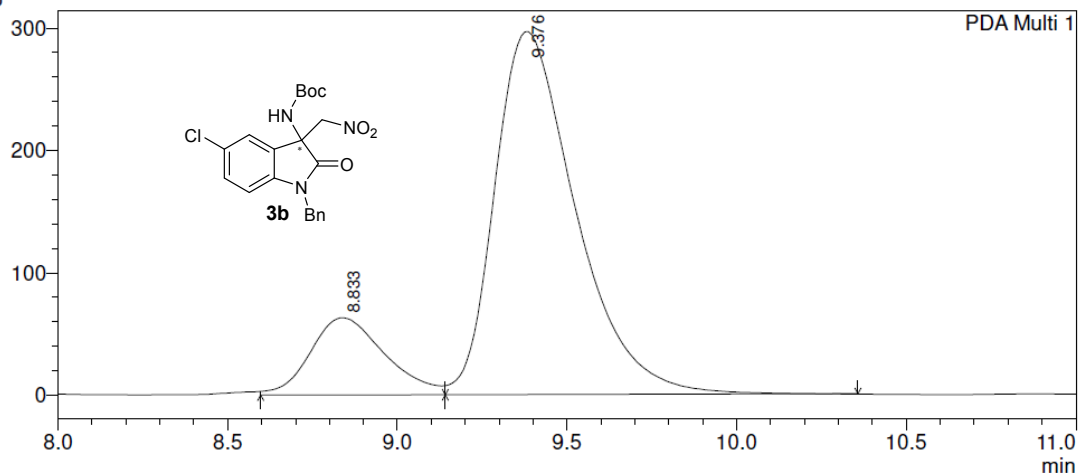

1 PDA Multi 1/254nm 4nm

PeakTable

PDA Ch1 254nm 4nm

| Peak# | Ret. Time | Area    | Height | Area %  | Height % |
|-------|-----------|---------|--------|---------|----------|
| 1     | 8.833     | 966929  | 63119  | 16.428  | 17.543   |
| 2     | 9.376     | 4919015 | 296668 | 83.572  | 82.457   |
| Total |           | 5885944 | 359787 | 100.000 | 100.000  |

# ==== Shimadzu LCsolution Analysis Report ====

D:\HPLC\Akshay\Schff Base derivatives (ch3no2)\new data\Br-NbenzylSB+CH3NO2, 1ml,10%, ODH rec.lcd  
mAU

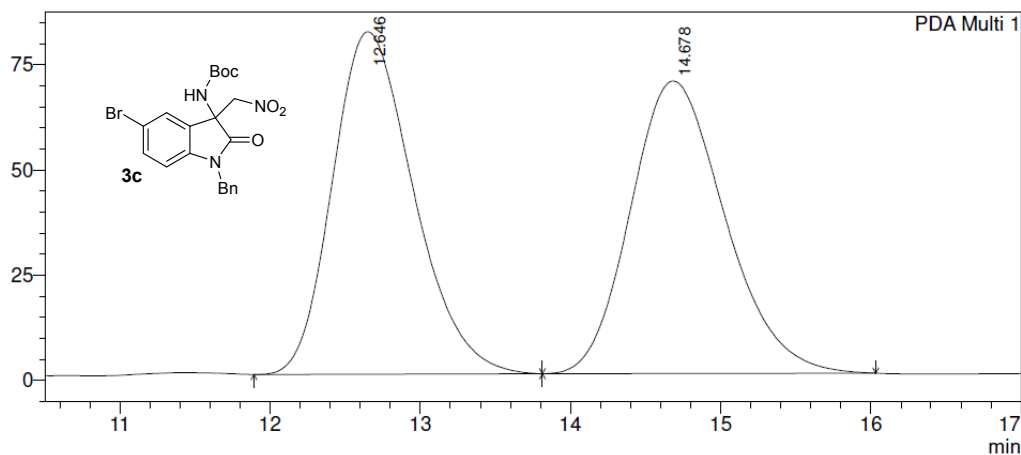

1 PDA Multi 1/254nm 4nm

PeakTable

PDA Ch1 254nm 4nm

| Peak# | Ret. Time | Area    | Height | Area %  | Height % |
|-------|-----------|---------|--------|---------|----------|
| 1     | 12.646    | 3047501 | 81293  | 50.114  | 53.929   |
| 2     | 14.678    | 3033645 | 69448  | 49.886  | 46.071   |
| Total |           | 6081146 | 150741 | 100.000 | 100.000  |

D:\HPLC\Akshay\Schff Base derivatives (ch3no2)\new data\Br-NbenzylSB+CH3NO2, 1ml,10%, ODH Chiral.lcd  
mAU

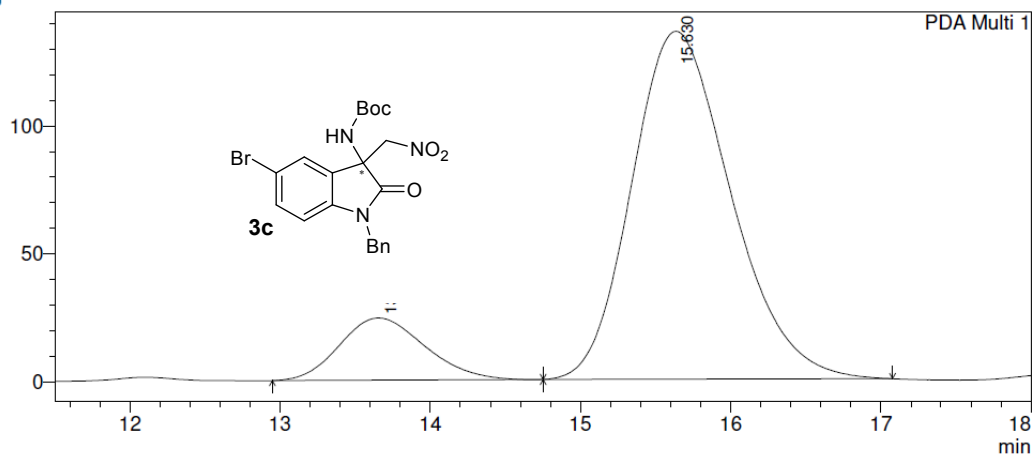

1 PDA Multi 1/254nm 4nm

PeakTable

PDA Ch1 254nm 4nm

| Peak# | Ret. Time | Area    | Height | Area %  | Height % |
|-------|-----------|---------|--------|---------|----------|
| 1     | 13.650    | 957649  | 24333  | 13.323  | 15.171   |
| 2     | 15.630    | 6230471 | 136062 | 86.677  | 84.829   |
| Total |           | 7188121 | 160396 | 100.000 | 100.000  |

# ==== Shimadzu LCsolution Analysis Report ====

D:\HPLC\Akshay\Schff Base derivatives (ch3no2)\new data\l-NbenzylSB+CH3NO2, 1ml,10%, ODH rec001.lcd  
mAU

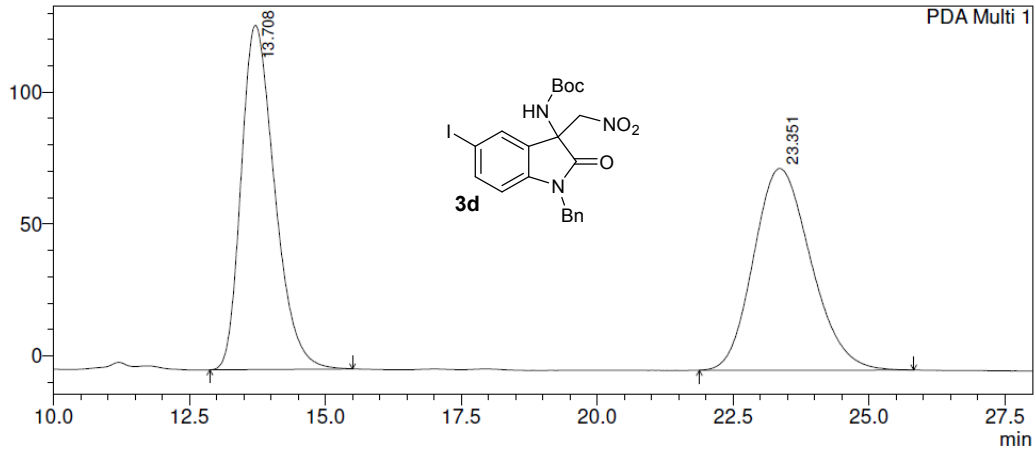

1 PDA Multi 1/254nm 4nm

PeakTable

PDA Ch1 254nm 4nm

| Peak# | Ret. Time | Area     | Height | Area %  | Height % |
|-------|-----------|----------|--------|---------|----------|
| 1     | 13.708    | 5607790  | 130491 | 49.996  | 63.056   |
| 2     | 23.351    | 5608769  | 76455  | 50.004  | 36.944   |
| Total |           | 11216559 | 206946 | 100.000 | 100.000  |

D:\HPLC\Akshay\Schff Base derivatives (ch3no2)\new data\l-NbenzylSB+CH3NO2, 1ml,10% ODH chiral.lcd  
mAU

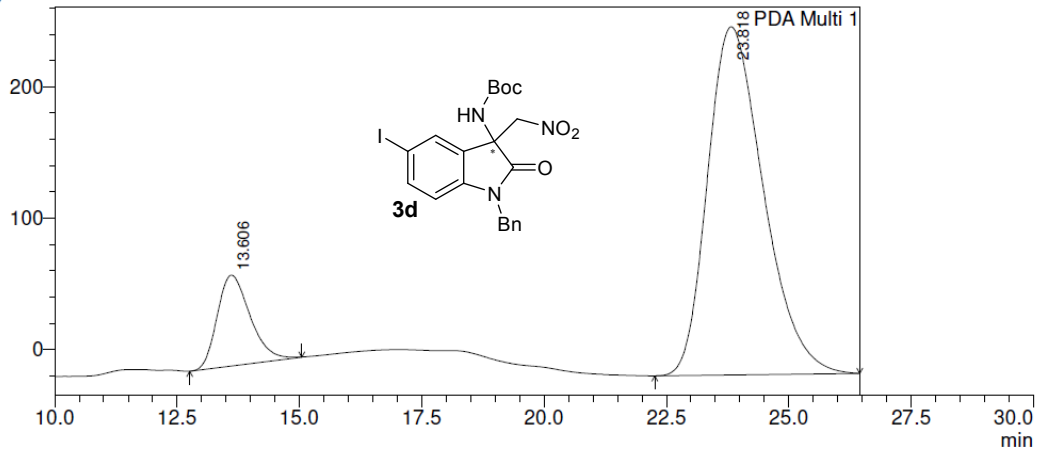

1 PDA Multi 1/254nm 4nm

PeakTable

PDA Ch1 254nm 4nm

| Peak# | Ret. Time | Area     | Height | Area %  | Height % |
|-------|-----------|----------|--------|---------|----------|
| 1     | 13.606    | 3227921  | 69188  | 13.302  | 20.699   |
| 2     | 23.818    | 21039419 | 265066 | 86.698  | 79.301   |
| Total |           | 24267341 | 334254 | 100.000 | 100.000  |

# ==== Shimadzu LCsolution Analysis Report ====

D:\HPLC\Akshay\Schff Base derivatives (ch3no2)\N-allylisschffbase+CH3NO2, ODH,1ml,10% Racemic0001.lcd  
mAU

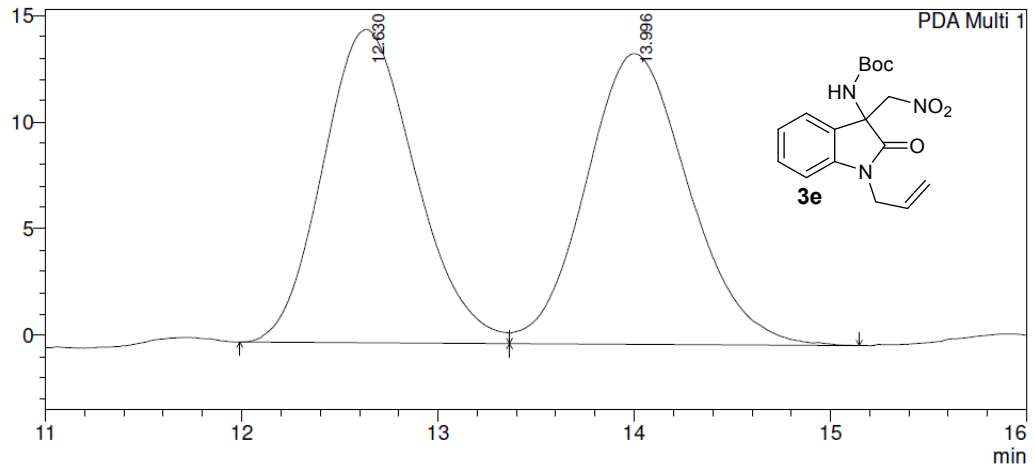

1 PDA Multi 1/254nm 4nm

PeakTable

PDA Ch1 254nm 4nm

| Peak# | Ret. Time | Area   | Height | Area %  | Height % |
|-------|-----------|--------|--------|---------|----------|
| 1     | 12.630    | 482676 | 14691  | 49.183  | 51.872   |
| 2     | 13.996    | 498721 | 13631  | 50.817  | 48.128   |
| Total |           | 981396 | 28322  | 100.000 | 100.000  |

D:\HPLC\Akshay\Schff Base derivatives (ch3no2)\N-allylisschffbase+CH3NO2, ODH,1ml,10% chiral0001.lcd  
mAU

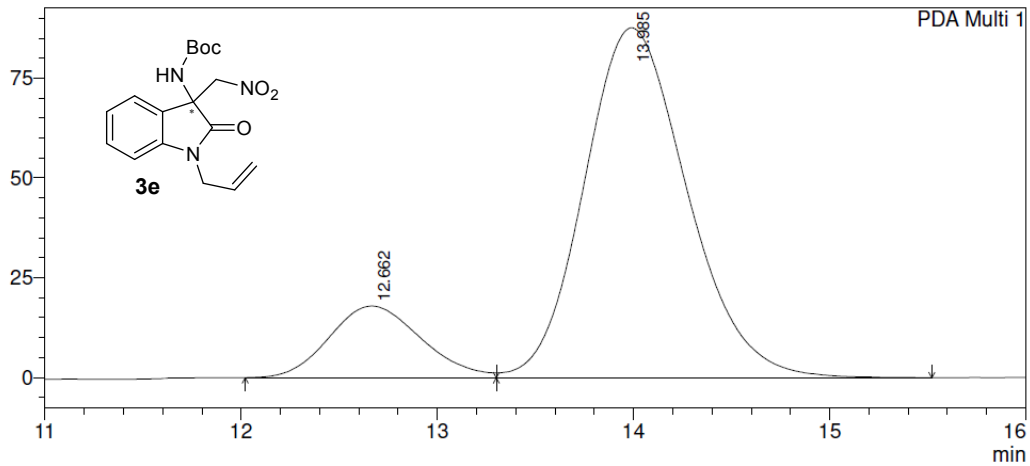

1 PDA Multi 1/254nm 4nm

PeakTable

PDA Ch1 254nm 4nm

| Peak# | Ret. Time | Area    | Height | Area %  | Height % |
|-------|-----------|---------|--------|---------|----------|
| 1     | 12.662    | 585532  | 17948  | 15.479  | 16.987   |
| 2     | 13.985    | 3197122 | 87712  | 84.521  | 83.013   |
| Total |           | 3782654 | 105660 | 100.000 | 100.000  |

# ==== Shimadzu LCsolution Analysis Report ====

D:\...\Schff Base derivatives (ch3no2)\scff bases\Cl-Nallylschff base+ CH3NO2, 10%, 1ml,OD\_H rec0002.lcd  
mAU

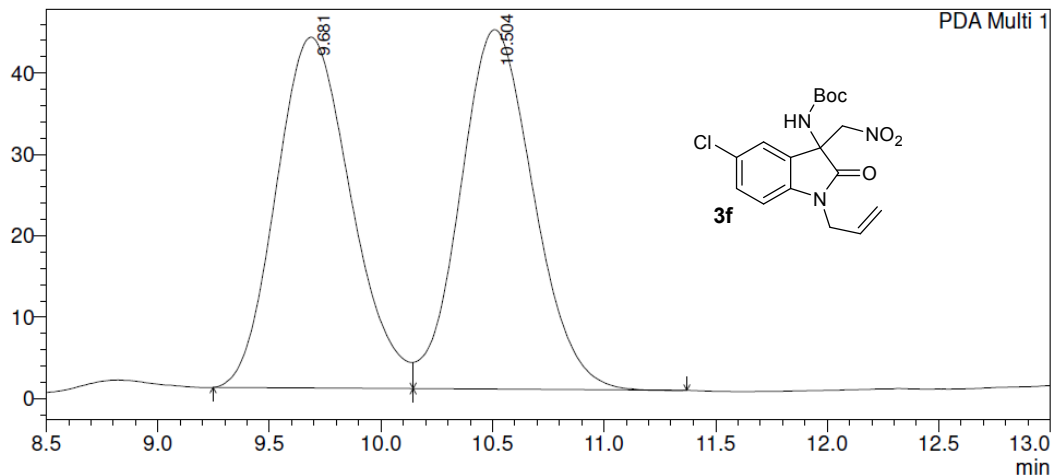

1 PDA Multi 1/254nm 4nm

PeakTable

PDA Ch1 254nm 4nm

| Peak# | Ret. Time | Area    | Height | Area %  | Height % |
|-------|-----------|---------|--------|---------|----------|
| 1     | 9.681     | 1007418 | 43122  | 50.012  | 49.398   |
| 2     | 10.504    | 1006944 | 44173  | 49.988  | 50.602   |
| Total |           | 2014361 | 87295  | 100.000 | 100.000  |

D:\...\Schff Base derivatives (ch3no2)\scff bases\Cl-Nallylschff base+ CH3NO2, 10%, 1ml,OD\_H chiral0003.lcd  
mAU

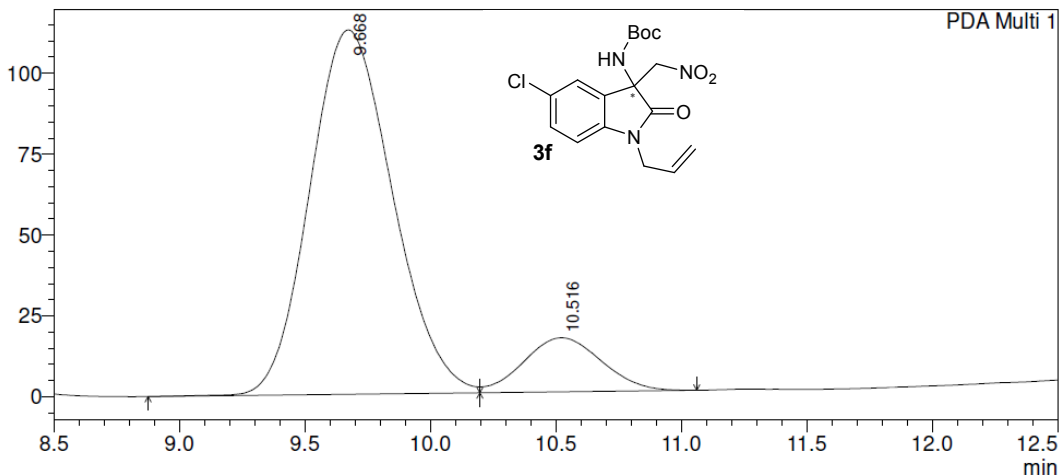

1 PDA Multi 1/254nm 4nm

PeakTable

PDA Ch1 254nm 4nm

| Peak# | Ret. Time | Area    | Height | Area %  | Height % |
|-------|-----------|---------|--------|---------|----------|
| 1     | 9.668     | 2588111 | 112605 | 87.746  | 87.070   |
| 2     | 10.516    | 361424  | 16721  | 12.254  | 12.930   |
| Total |           | 2949535 | 129327 | 100.000 | 100.000  |

# ==== Shimadzu LCsolution Analysis Report ====

D:\...\Schff Base derivatives (ch3no2)\scff bases\Br-N-allylschbase+CH3NO2, ODH, 1ml, 10mol%(racemic)0001.lcd  
mAU

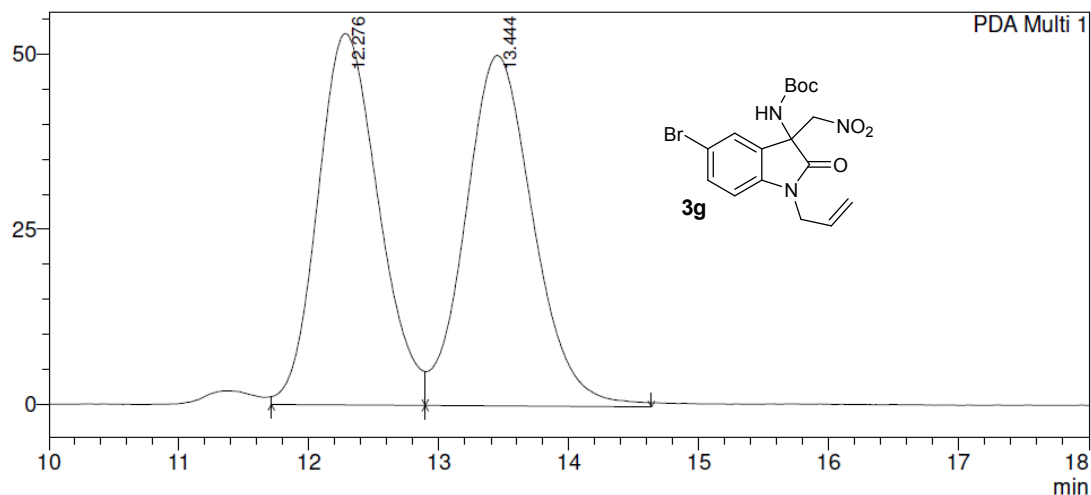

1 PDA Multi 1/254nm 4nm

PeakTable

PDA Ch1 254nm 4nm

| Peak# | Ret. Time | Area    | Height | Area %  | Height % |
|-------|-----------|---------|--------|---------|----------|
| 1     | 12.276    | 1723022 | 53096  | 48.720  | 51.461   |
| 2     | 13.444    | 1813537 | 50081  | 51.280  | 48.539   |
| Total |           | 3536559 | 103177 | 100.000 | 100.000  |

D:\...\Schff Base derivatives (ch3no2)\scff bases\Br-N-allylschbase+CH3NO2, ODH, 1ml, 10mol%(chiral)0001.lcd  
mAU

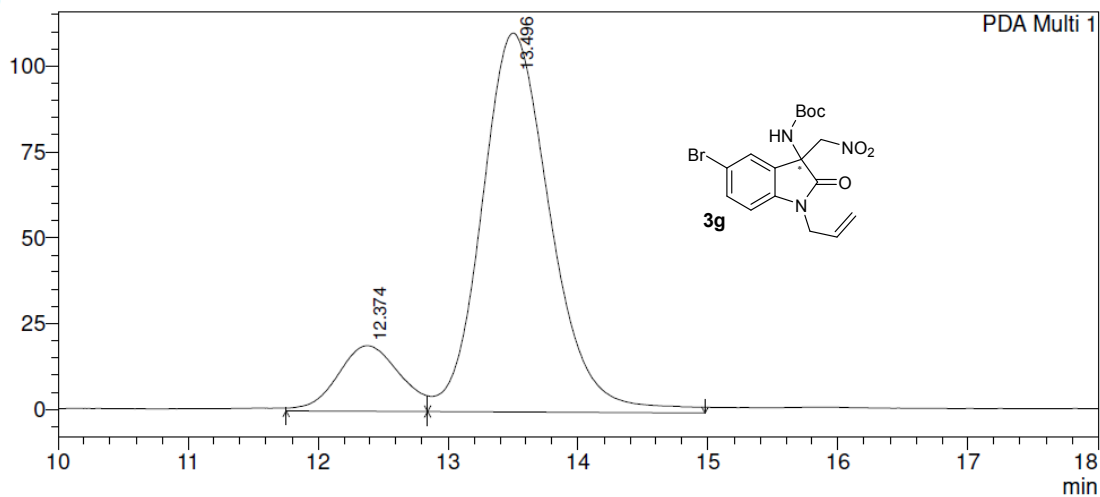

1 PDA Multi 1/254nm 4nm

PeakTable

PDA Ch1 254nm 4nm

| Peak# | Ret. Time | Area    | Height | Area %  | Height % |
|-------|-----------|---------|--------|---------|----------|
| 1     | 12.374    | 634750  | 19122  | 13.516  | 14.760   |
| 2     | 13.496    | 4061391 | 110432 | 86.484  | 85.240   |
| Total |           | 4696142 | 129554 | 100.000 | 100.000  |



# ==== Shimadzu LCsolution Analysis Report ====

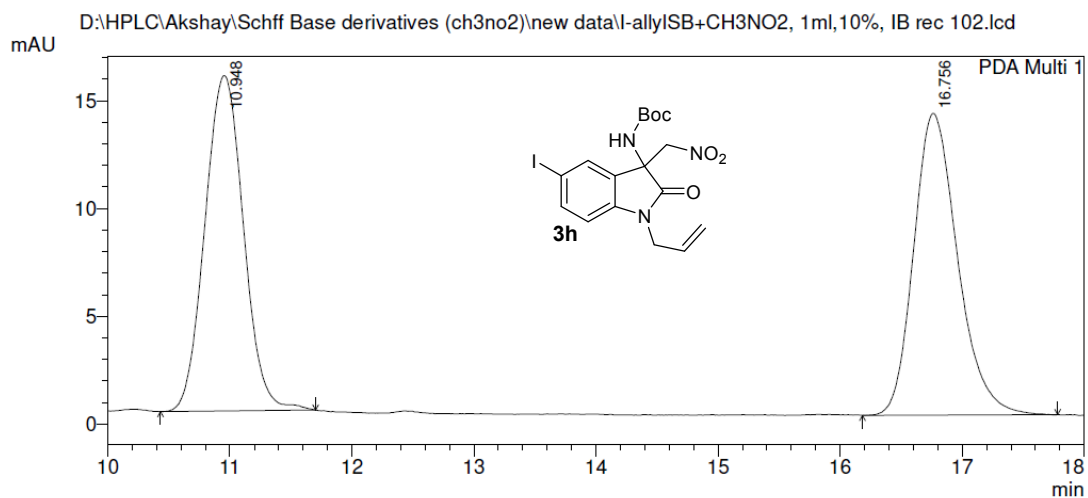

PeakTable

| Peak# | Ret. Time | Area   | Height | Area %  | Height % |
|-------|-----------|--------|--------|---------|----------|
| 1     | 10.948    | 341972 | 15543  | 49.456  | 52.641   |
| 2     | 16.756    | 349496 | 13984  | 50.544  | 47.359   |
| Total |           | 691468 | 29527  | 100.000 | 100.000  |

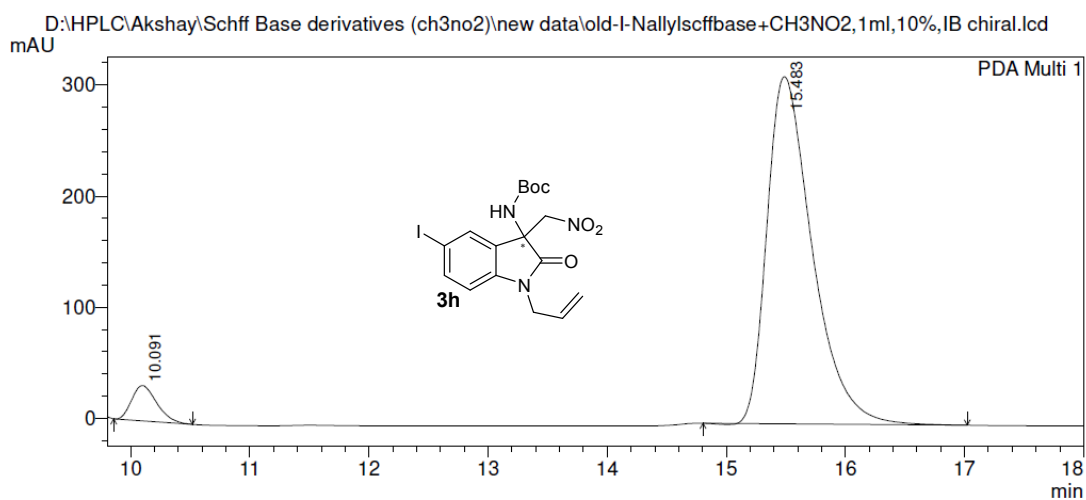

PeakTable

| Peak# | Ret. Time | Area    | Height | Area %  | Height % |
|-------|-----------|---------|--------|---------|----------|
| 1     | 10.091    | 462506  | 31703  | 5.306   | 9.213    |
| 2     | 15.483    | 8253592 | 312407 | 94.694  | 90.787   |
| Total |           | 8716098 | 344110 | 100.000 | 100.000  |

# ==== Shimadzu LCsolution Analysis Report ====

D:\HPLC\Akshay\Schff Base derivatives (ch3no2)\scff bases\Cl-Nallyl-Br-propen ist+CH3NO2, 1ml,10%, OD-H rec.lcd  
mAU

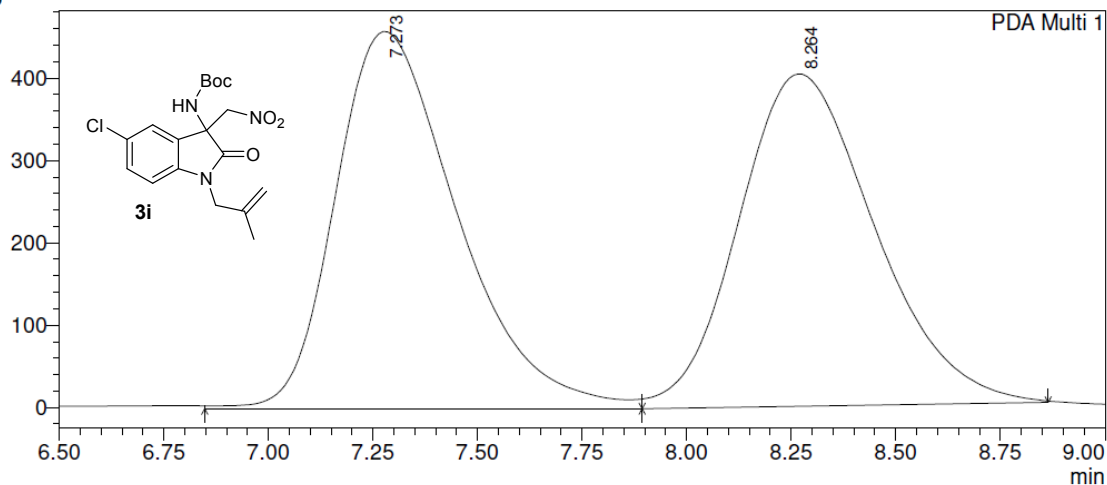

1 PDA Multi 1/254nm 4nm

PeakTable

PDA Ch1 254nm 4nm

| Peak# | Ret. Time | Area     | Height | Area %  | Height % |
|-------|-----------|----------|--------|---------|----------|
| 1     | 7.273     | 9288930  | 458260 | 50.458  | 53.163   |
| 2     | 8.264     | 9120240  | 403730 | 49.542  | 46.837   |
| Total |           | 18409170 | 861991 | 100.000 | 100.000  |

D:\...Akshay\Schff Base derivatives (ch3no2)\scff bases\Cl-Nallyl-Br-propen ist+CH3NO2, 1ml,10%, OD-H chiral.lcd  
mAU

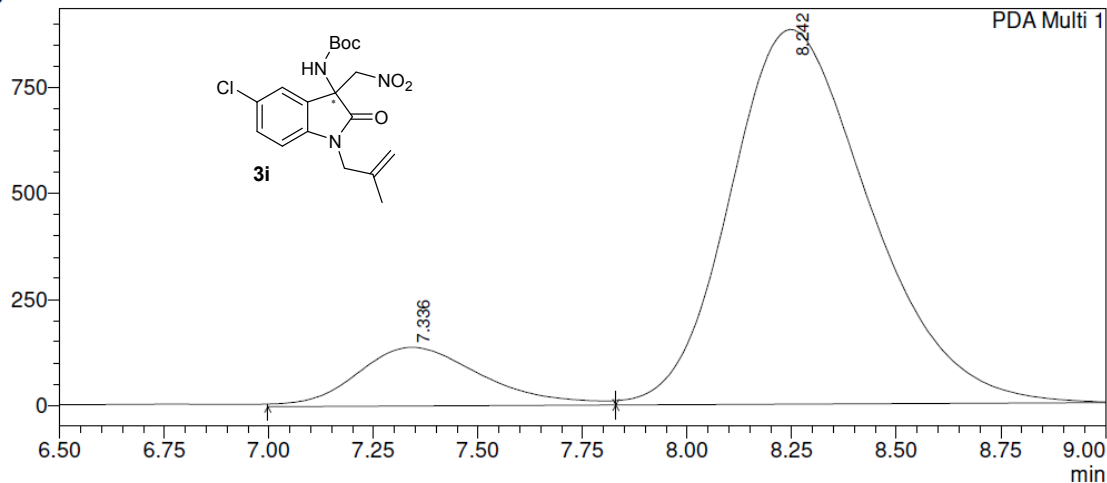

1 PDA Multi 1/254nm 4nm

PeakTable

PDA Ch1 254nm 4nm

| Peak# | Ret. Time | Area     | Height  | Area %  | Height % |
|-------|-----------|----------|---------|---------|----------|
| 1     | 7.336     | 2912621  | 138606  | 12.393  | 13.550   |
| 2     | 8.242     | 20589757 | 884299  | 87.607  | 86.450   |
| Total |           | 23502378 | 1022905 | 100.000 | 100.000  |

# ==== Shimadzu LCsolution Analysis Report ====

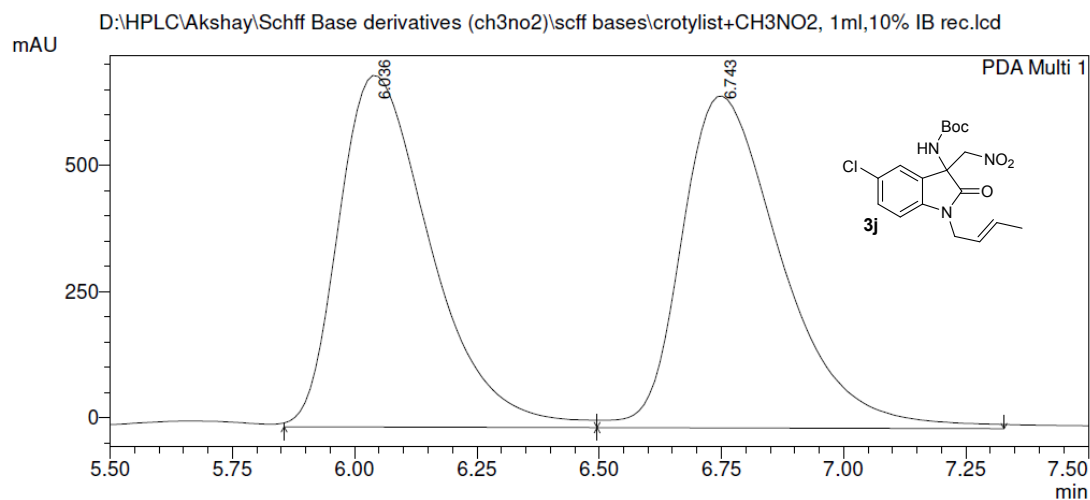

PeakTable

PDA Ch1 254nm 4nm

| Peak# | Ret. Time | Area     | Height  | Area %  | Height % |
|-------|-----------|----------|---------|---------|----------|
| 1     | 6.036     | 9140645  | 695932  | 49.244  | 51.435   |
| 2     | 6.743     | 9421132  | 657112  | 50.756  | 48.565   |
| Total |           | 18561778 | 1353044 | 100.000 | 100.000  |

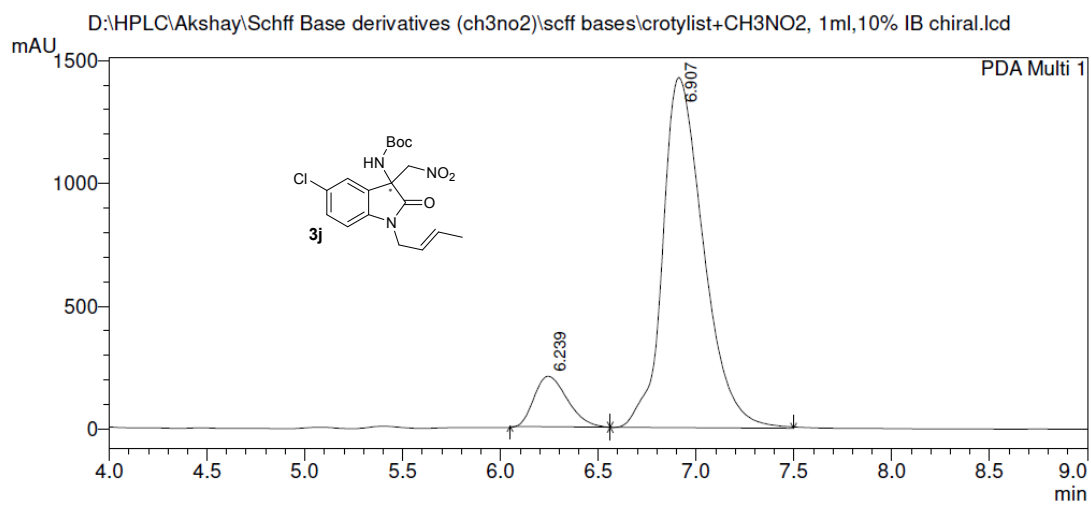

PeakTable

PDA Ch1 254nm 4nm

| Peak# | Ret. Time | Area     | Height  | Area %  | Height % |
|-------|-----------|----------|---------|---------|----------|
| 1     | 6.239     | 2410421  | 204960  | 10.423  | 12.572   |
| 2     | 6.907     | 20716100 | 1425297 | 89.577  | 87.428   |
| Total |           | 23126521 | 1630257 | 100.000 | 100.000  |

## ==== Shimadzu LCsolution Analysis Report ====

D:\HPLC\Akshay\Schff Base derivatives (ch3no2)\new data\Cl-NHschff base+ CH3NO2, 1ml,10% IA (rec) 99.lcd  
mAU

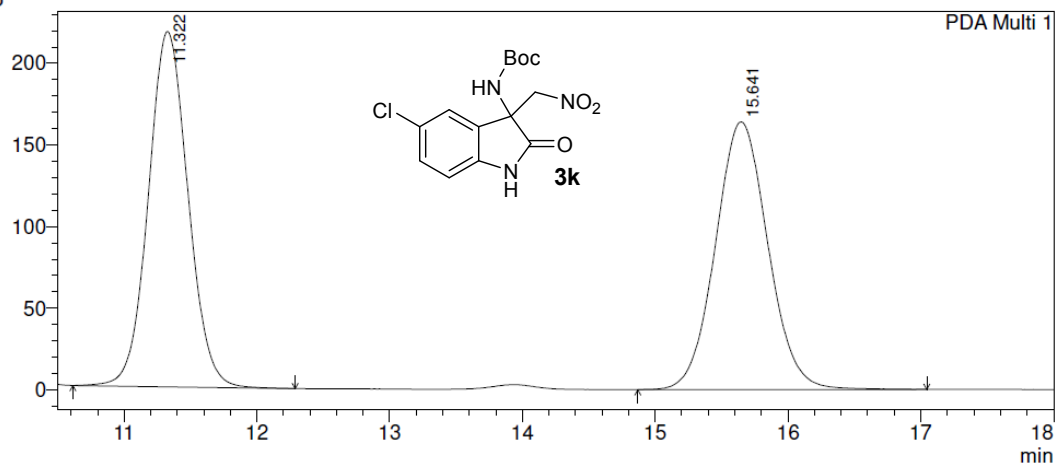

1 PDA Multi 1/254nm 4nm

PeakTable

PDA Ch1 254nm 4nm

| Peak# | Ret. Time | Area    | Height | Area %  | Height % |
|-------|-----------|---------|--------|---------|----------|
| 1     | 11.322    | 4526266 | 217701 | 50.136  | 57.035   |
| 2     | 15.641    | 4501756 | 163994 | 49.864  | 42.965   |
| Total |           | 9028021 | 381695 | 100.000 | 100.000  |

D:\HPLC\Akshay\Schff Base derivatives (ch3no2)\new data\Cl-NHschff base+ CH3NO2, 1ml,10% IA (chiral) 100.lcd  
mAU

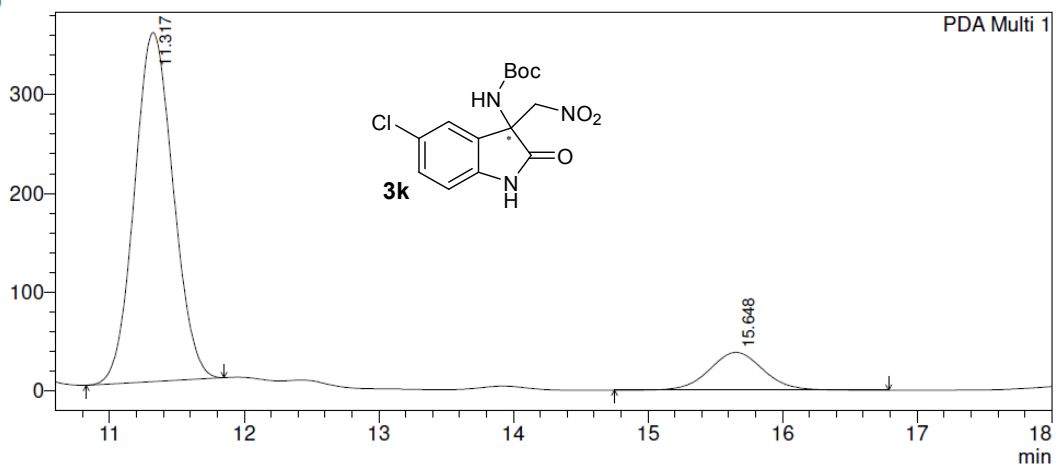

1 PDA Multi 1/254nm 4nm

PeakTable

PDA Ch1 254nm 4nm

| Peak# | Ret. Time | Area    | Height | Area %  | Height % |
|-------|-----------|---------|--------|---------|----------|
| 1     | 11.317    | 7077660 | 353443 | 86.864  | 90.240   |
| 2     | 15.648    | 1070275 | 38229  | 13.136  | 9.760    |
| Total |           | 8147935 | 391671 | 100.000 | 100.000  |

# ==== Shimadzu LCsolution Analysis Report ====

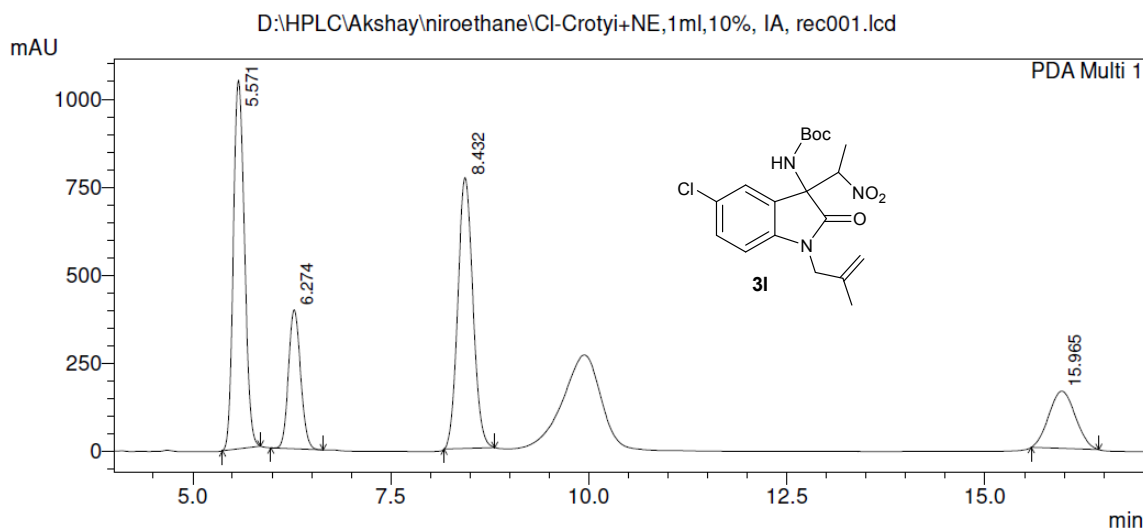

1 PDA Multi 1/254nm 4nm

PeakTable

PDA Ch1 254nm 4nm

| Peak# | Ret. Time | Area     | Height  | Area %  | Height % |
|-------|-----------|----------|---------|---------|----------|
| 1     | 5.571     | 10212841 | 1046673 | 35.972  | 44.097   |
| 2     | 6.274     | 4209789  | 394634  | 14.828  | 16.626   |
| 3     | 8.432     | 10186166 | 769492  | 35.878  | 32.419   |
| 4     | 15.965    | 3781984  | 162788  | 13.321  | 6.858    |
| Total |           | 28390780 | 2373588 | 100.000 | 100.000  |

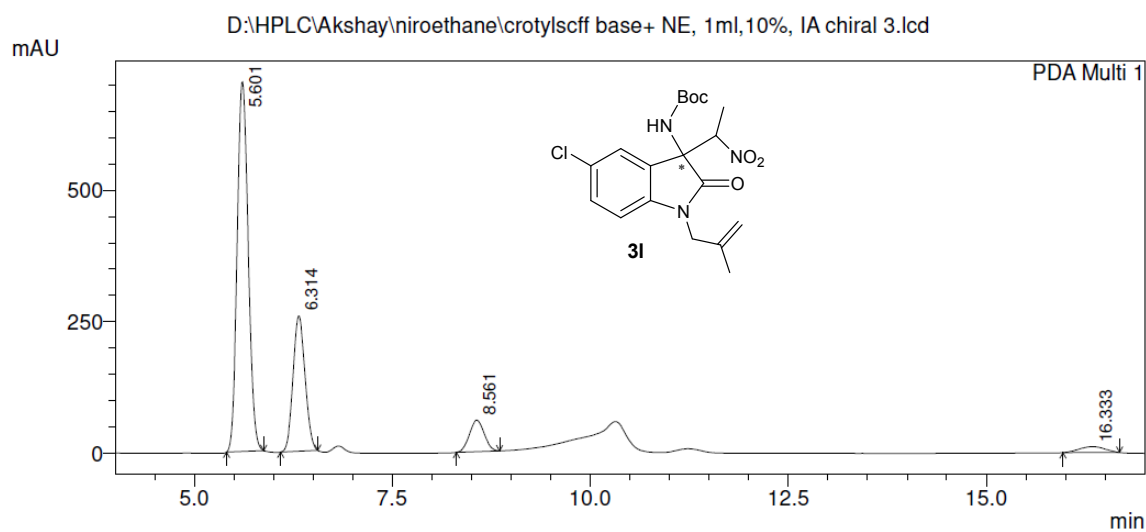

1 PDA Multi 1/254nm 4nm

PeakTable

PDA Ch1 254nm 4nm

| Peak# | Ret. Time | Area     | Height  | Area %  | Height % |
|-------|-----------|----------|---------|---------|----------|
| 1     | 5.601     | 6801781  | 702305  | 64.485  | 68.165   |
| 2     | 6.314     | 2721342  | 257069  | 25.800  | 24.951   |
| 3     | 8.561     | 775377   | 59620   | 7.351   | 5.787    |
| 4     | 16.333    | 249380   | 11301   | 2.364   | 1.097    |
| Total |           | 10547880 | 1030294 | 100.000 | 100.000  |

# ==== Shimadzu LCsolution Analysis Report ====

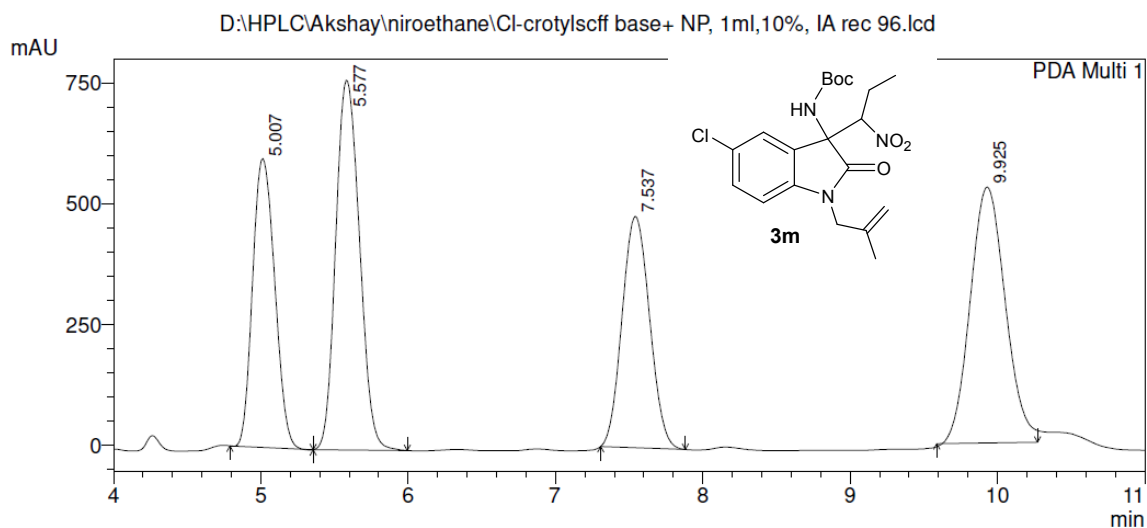

1 PDA Multi 1/210nm 4nm

PeakTable

PDA Ch1 210nm 4nm

| Peak# | Ret. Time | Area     | Height  | Area %  | Height % |
|-------|-----------|----------|---------|---------|----------|
| 1     | 5.007     | 6240916  | 598407  | 20.918  | 25.216   |
| 2     | 5.577     | 8585684  | 765722  | 28.777  | 32.266   |
| 3     | 7.537     | 6225642  | 479156  | 20.867  | 20.191   |
| 4     | 9.925     | 8783025  | 529834  | 29.438  | 22.326   |
| Total |           | 29835268 | 2373119 | 100.000 | 100.000  |

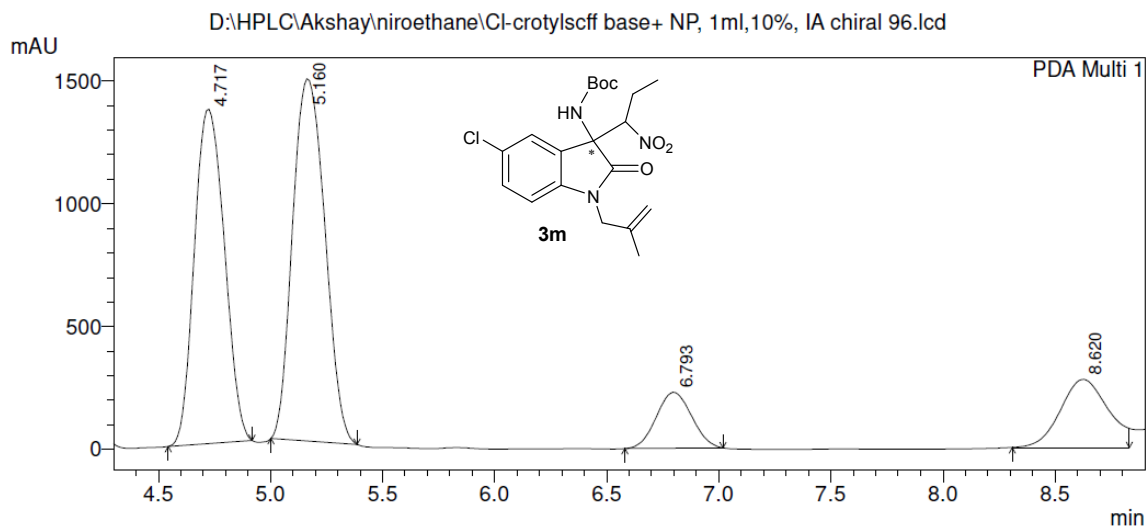

1 PDA Multi 1/210nm 4nm

PeakTable

PDA Ch1 210nm 4nm

| Peak# | Ret. Time | Area     | Height  | Area %  | Height % |
|-------|-----------|----------|---------|---------|----------|
| 1     | 4.717     | 12719903 | 1362120 | 37.277  | 40.748   |
| 2     | 5.160     | 14775156 | 1474943 | 43.300  | 44.123   |
| 3     | 6.793     | 2496332  | 227572  | 7.316   | 6.808    |
| 4     | 8.620     | 4131193  | 278182  | 12.107  | 8.322    |
| Total |           | 34122583 | 3342817 | 100.000 | 100.000  |

# ==== Shimadzu LCsolution Analysis Report ====

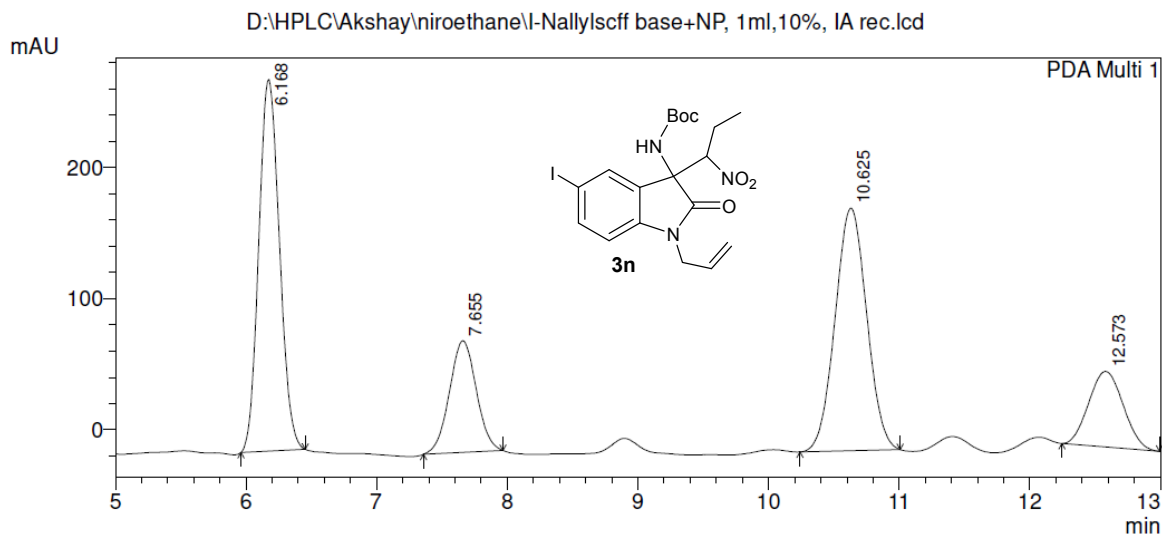

PeakTable

PDA Ch1 209nm 4nm

| Peak# | Ret. Time | Area    | Height | Area %  | Height % |
|-------|-----------|---------|--------|---------|----------|
| 1     | 6.168     | 3123252 | 283522 | 36.676  | 46.366   |
| 2     | 7.655     | 1220934 | 85199  | 14.337  | 13.933   |
| 3     | 10.625    | 3114764 | 185072 | 36.577  | 30.266   |
| 4     | 12.573    | 1056734 | 57692  | 12.409  | 9.435    |
| Total |           | 8515684 | 611486 | 100.000 | 100.000  |

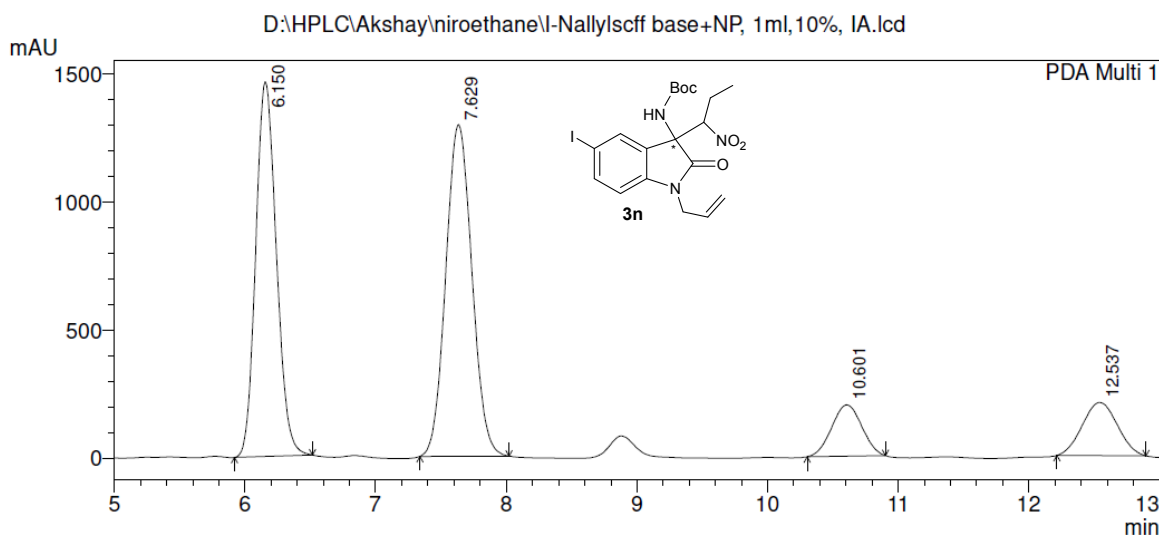

PeakTable

PDA Ch1 208nm 4nm

| Peak# | Ret. Time | Area     | Height  | Area %  | Height % |
|-------|-----------|----------|---------|---------|----------|
| 1     | 6.150     | 16061530 | 1463160 | 39.030  | 46.223   |
| 2     | 7.629     | 18006695 | 1294571 | 43.757  | 40.897   |
| 3     | 10.601    | 3214834  | 200034  | 7.812   | 6.319    |
| 4     | 12.537    | 3868842  | 207649  | 9.401   | 6.560    |
| Total |           | 41151901 | 3165414 | 100.000 | 100.000  |

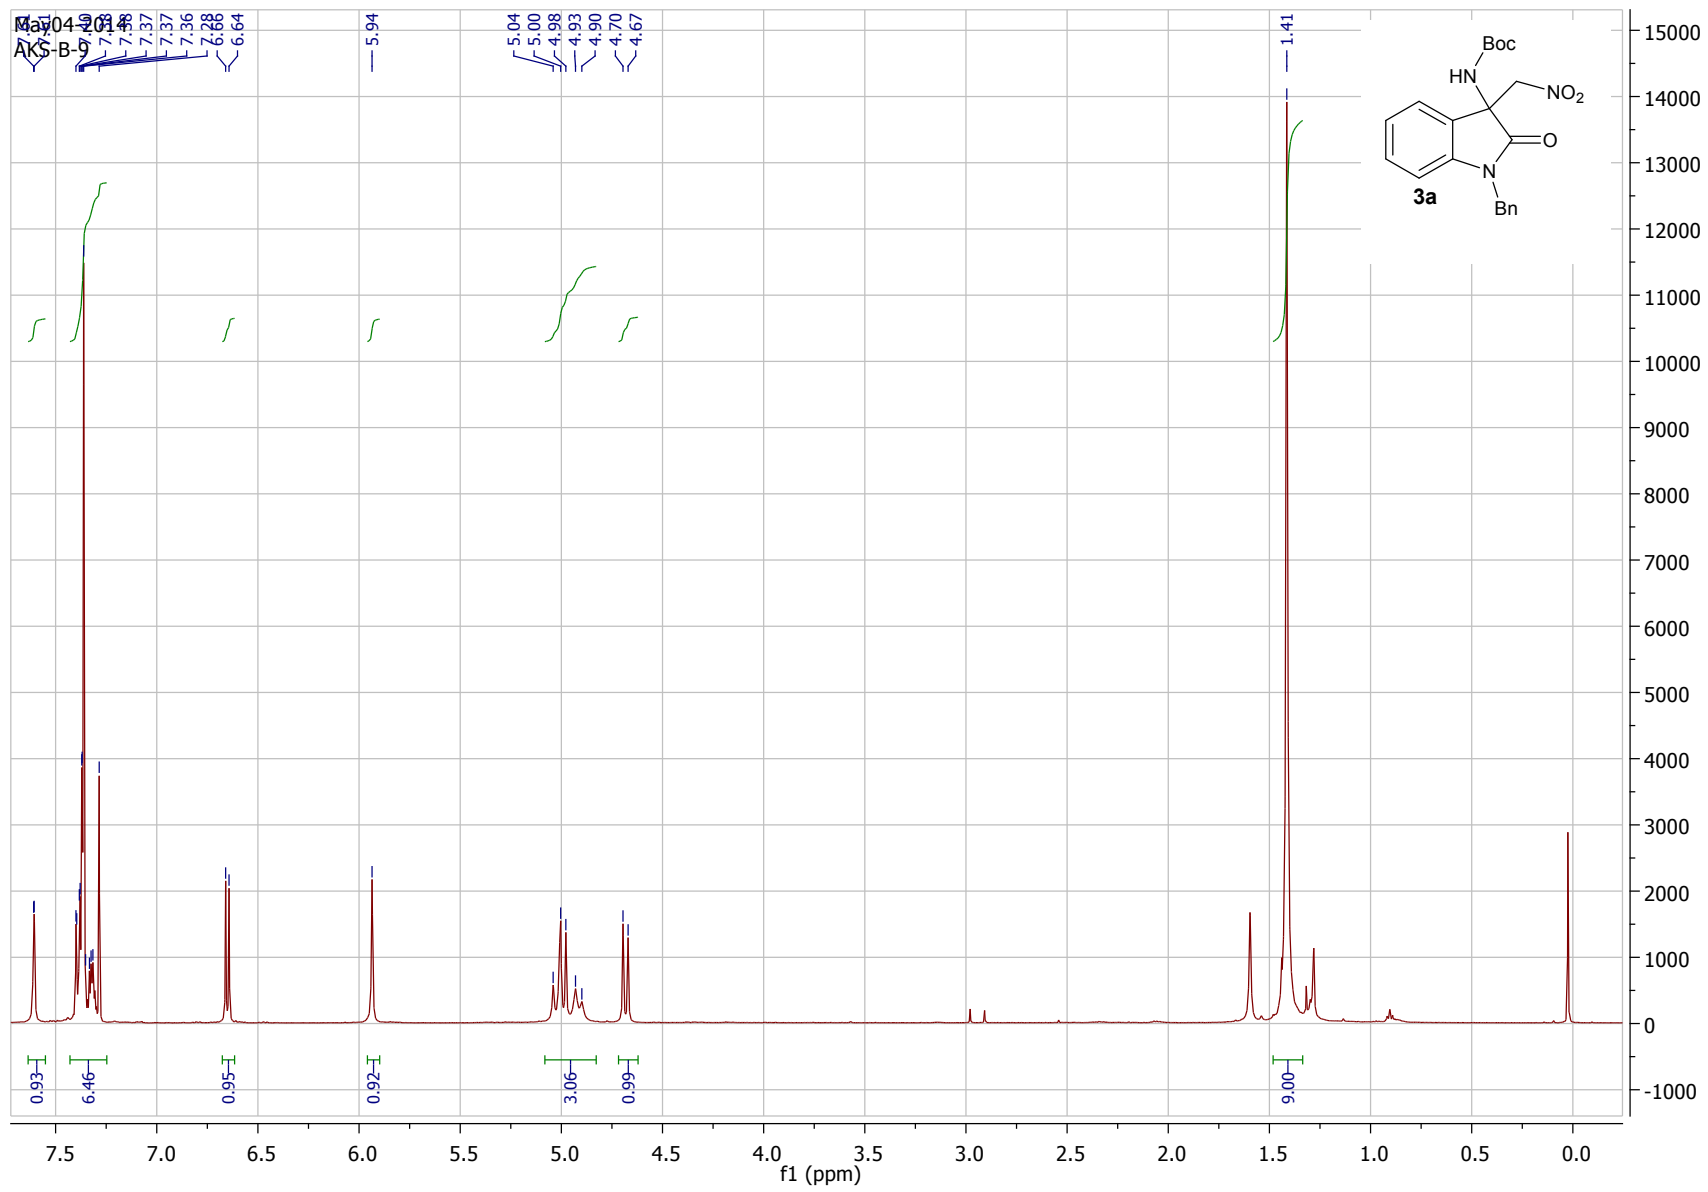



Apr 29 2014  
AKS-10

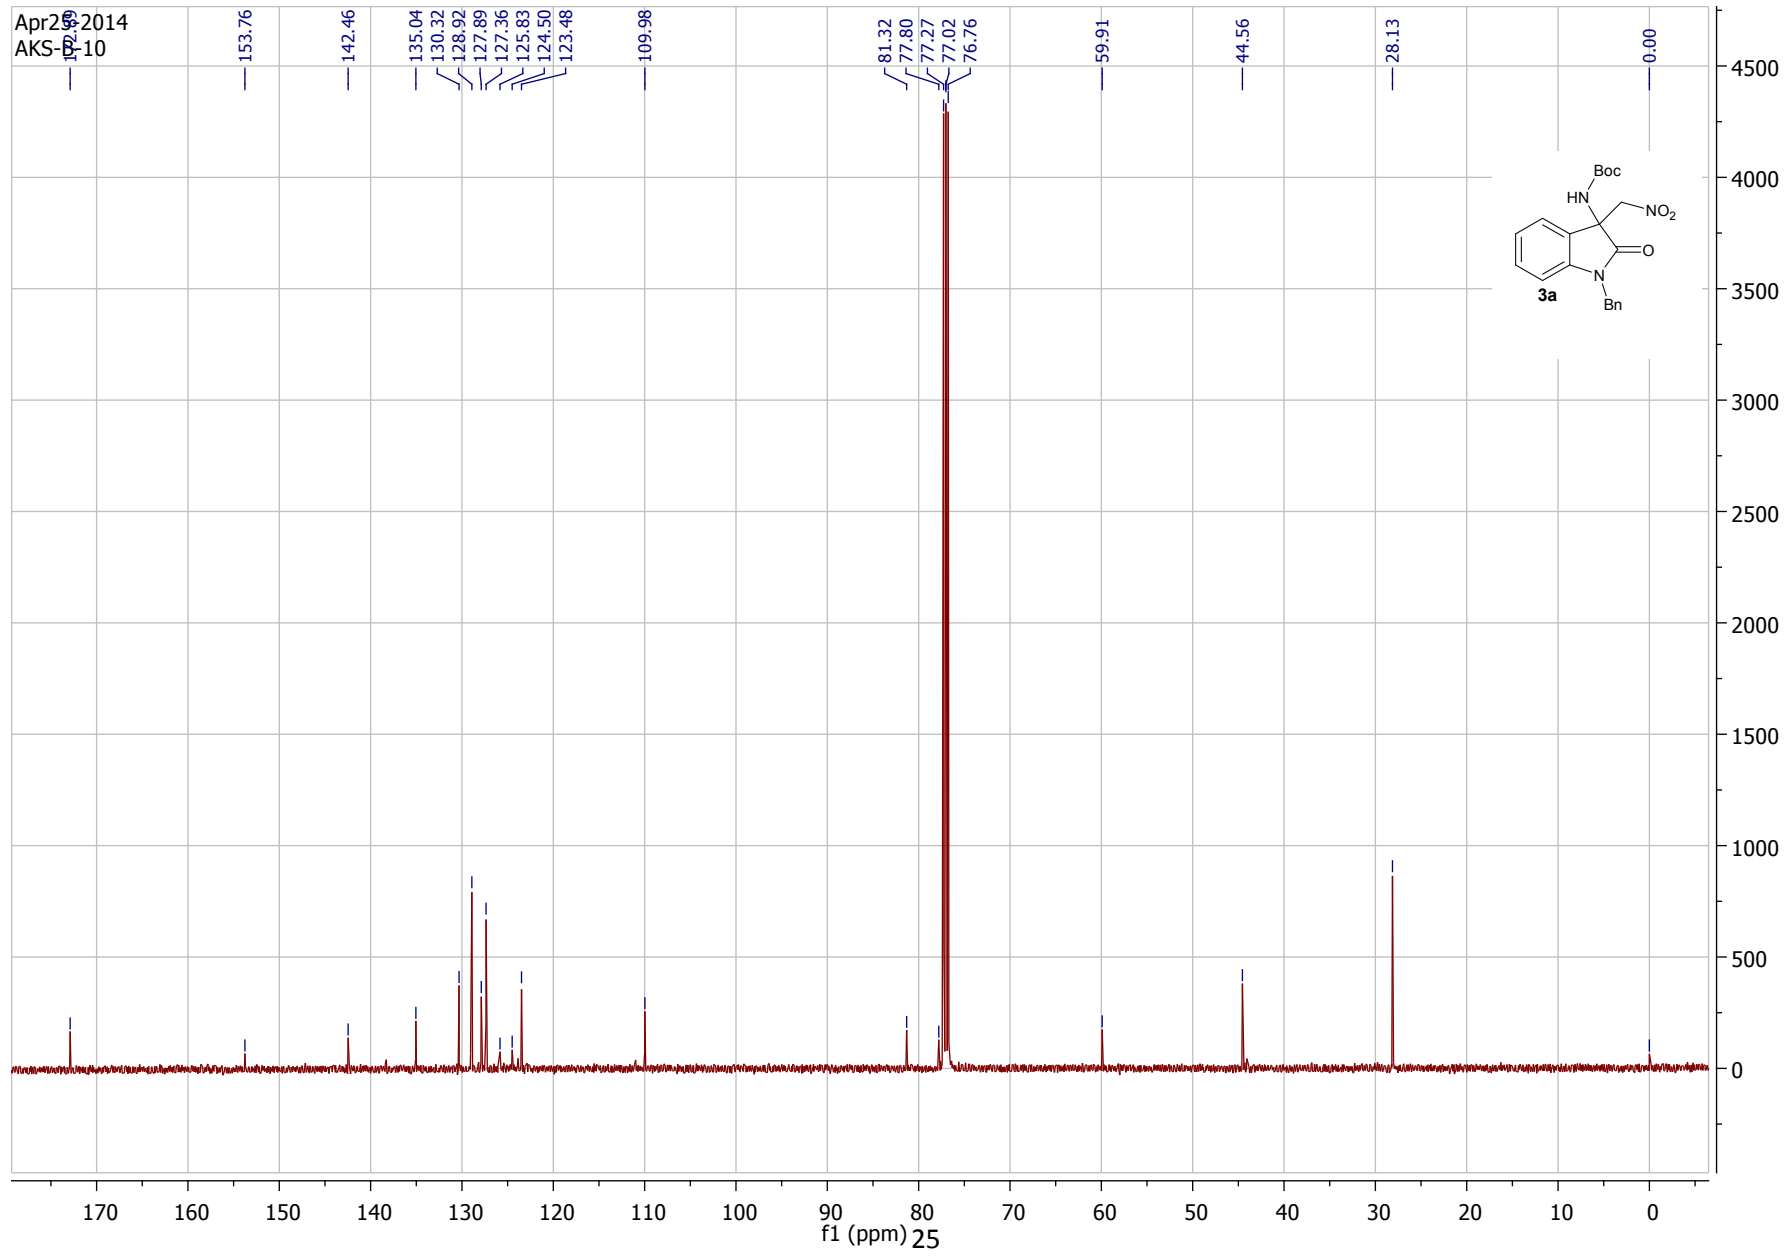

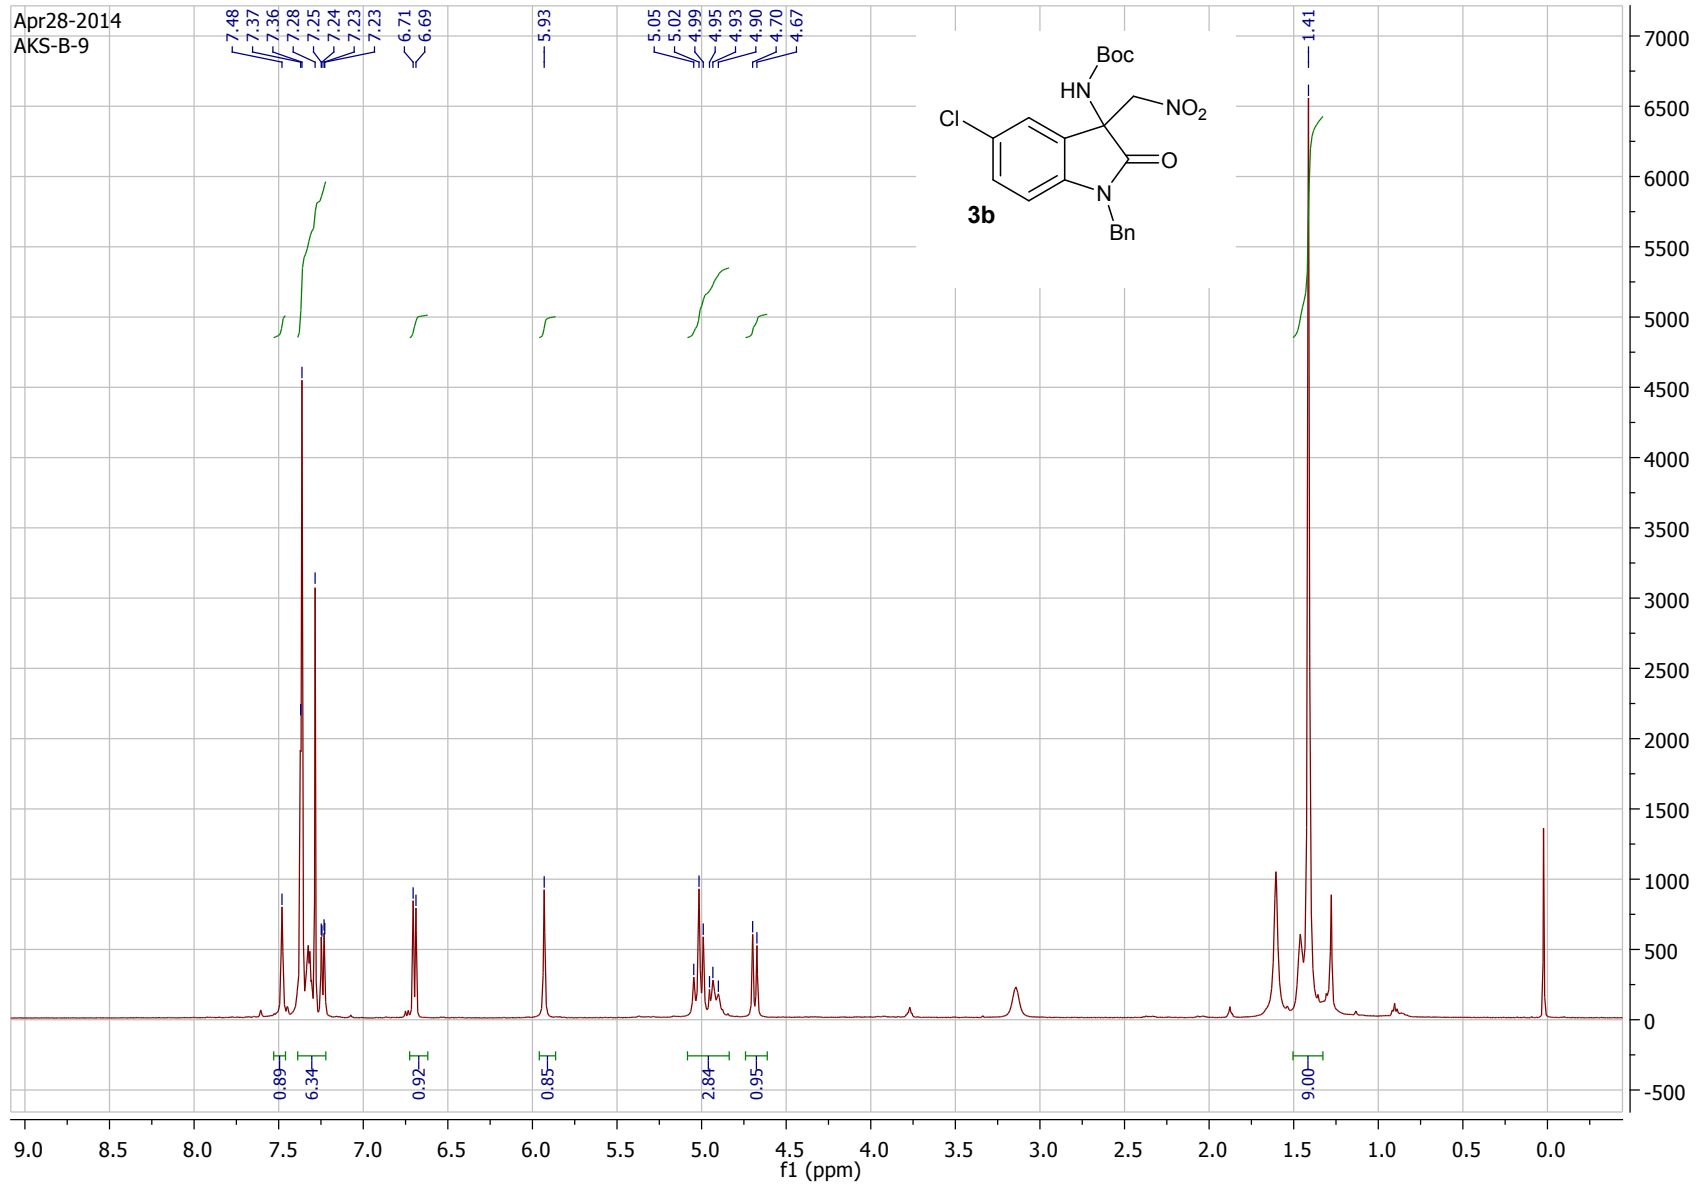

Apr 28, 2014  
AKS-B-9

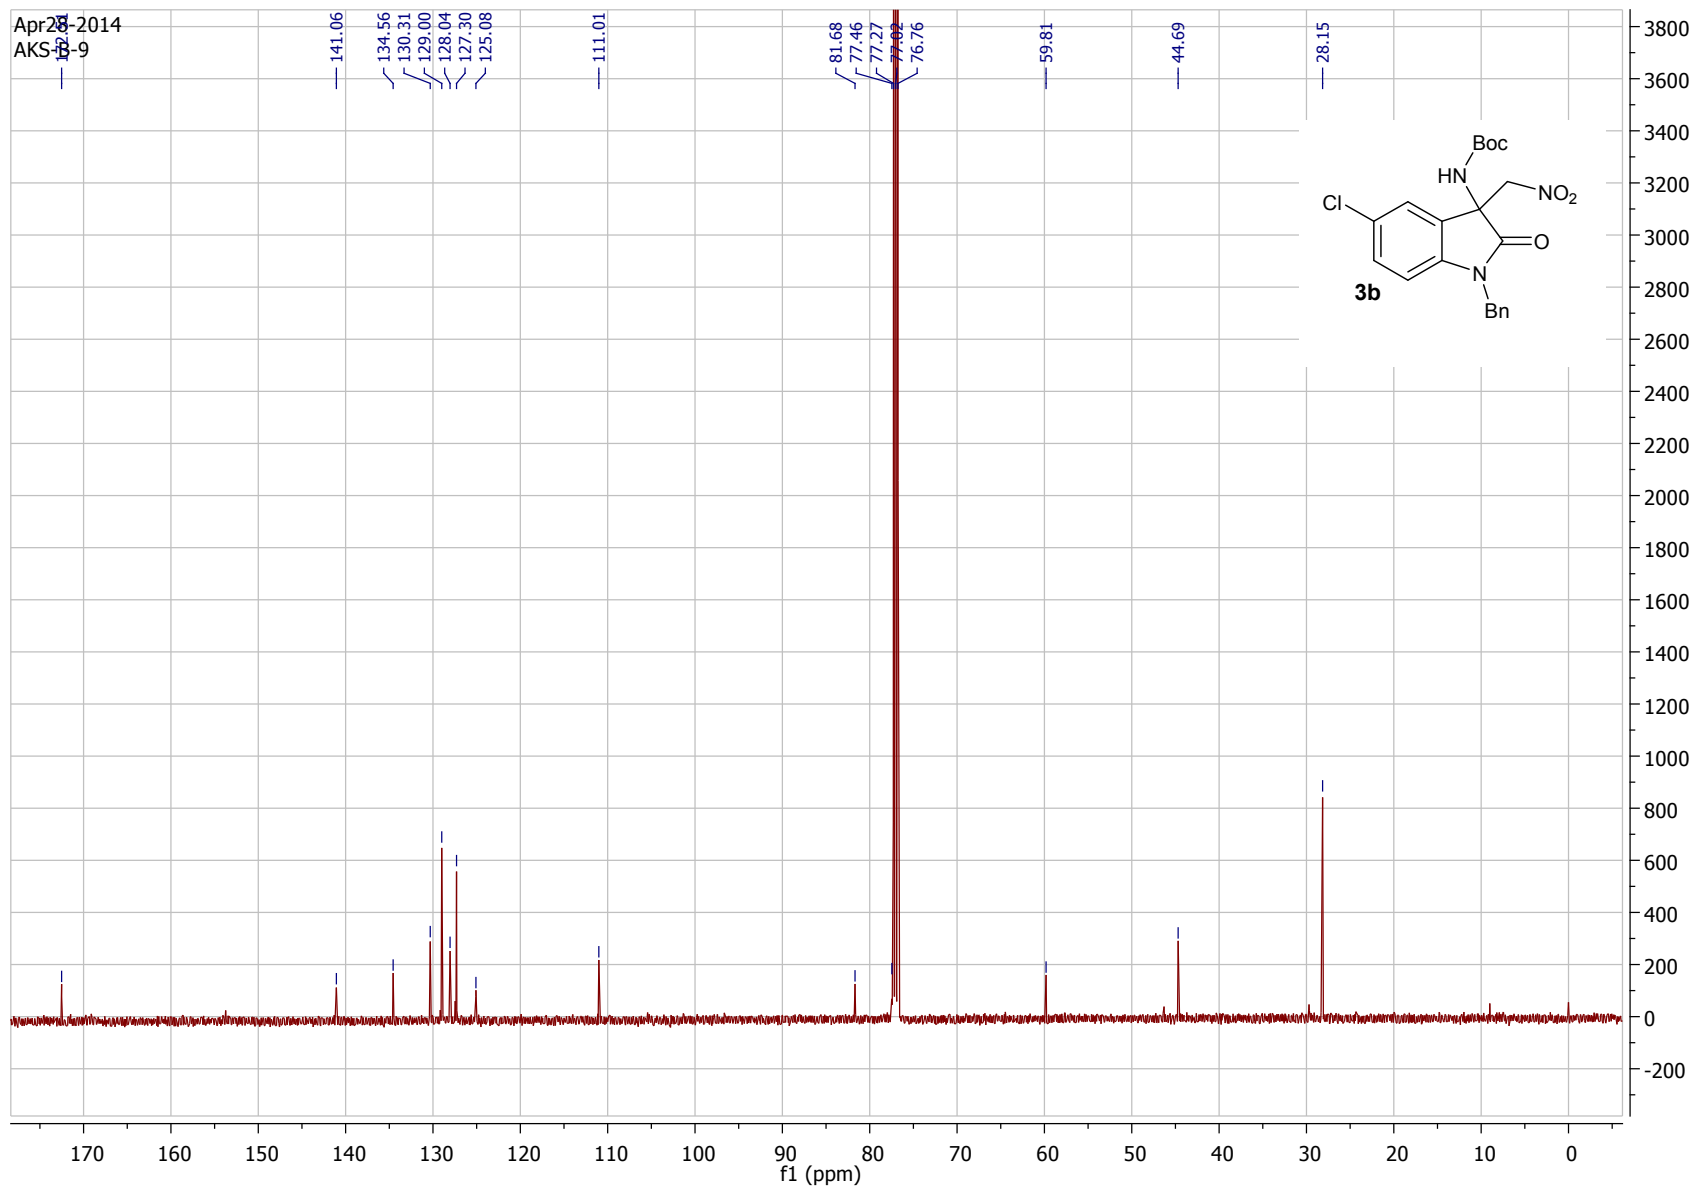

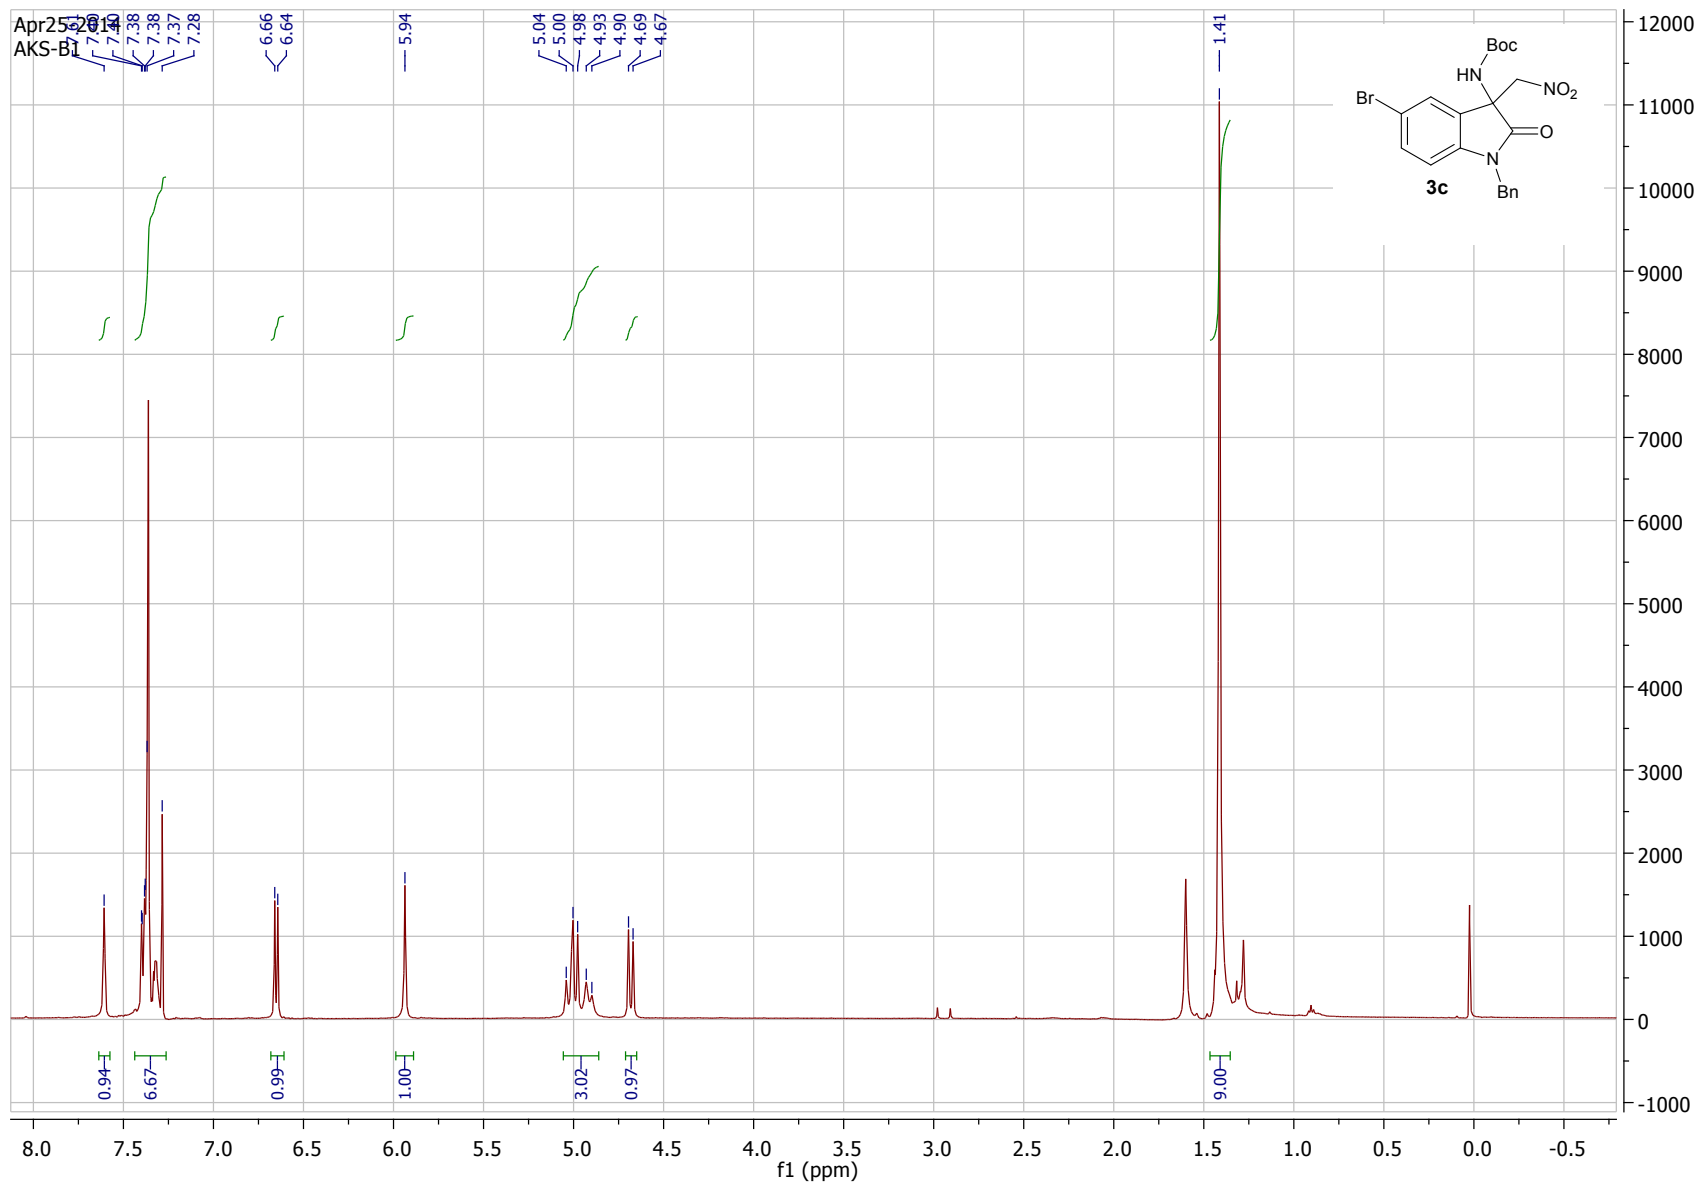

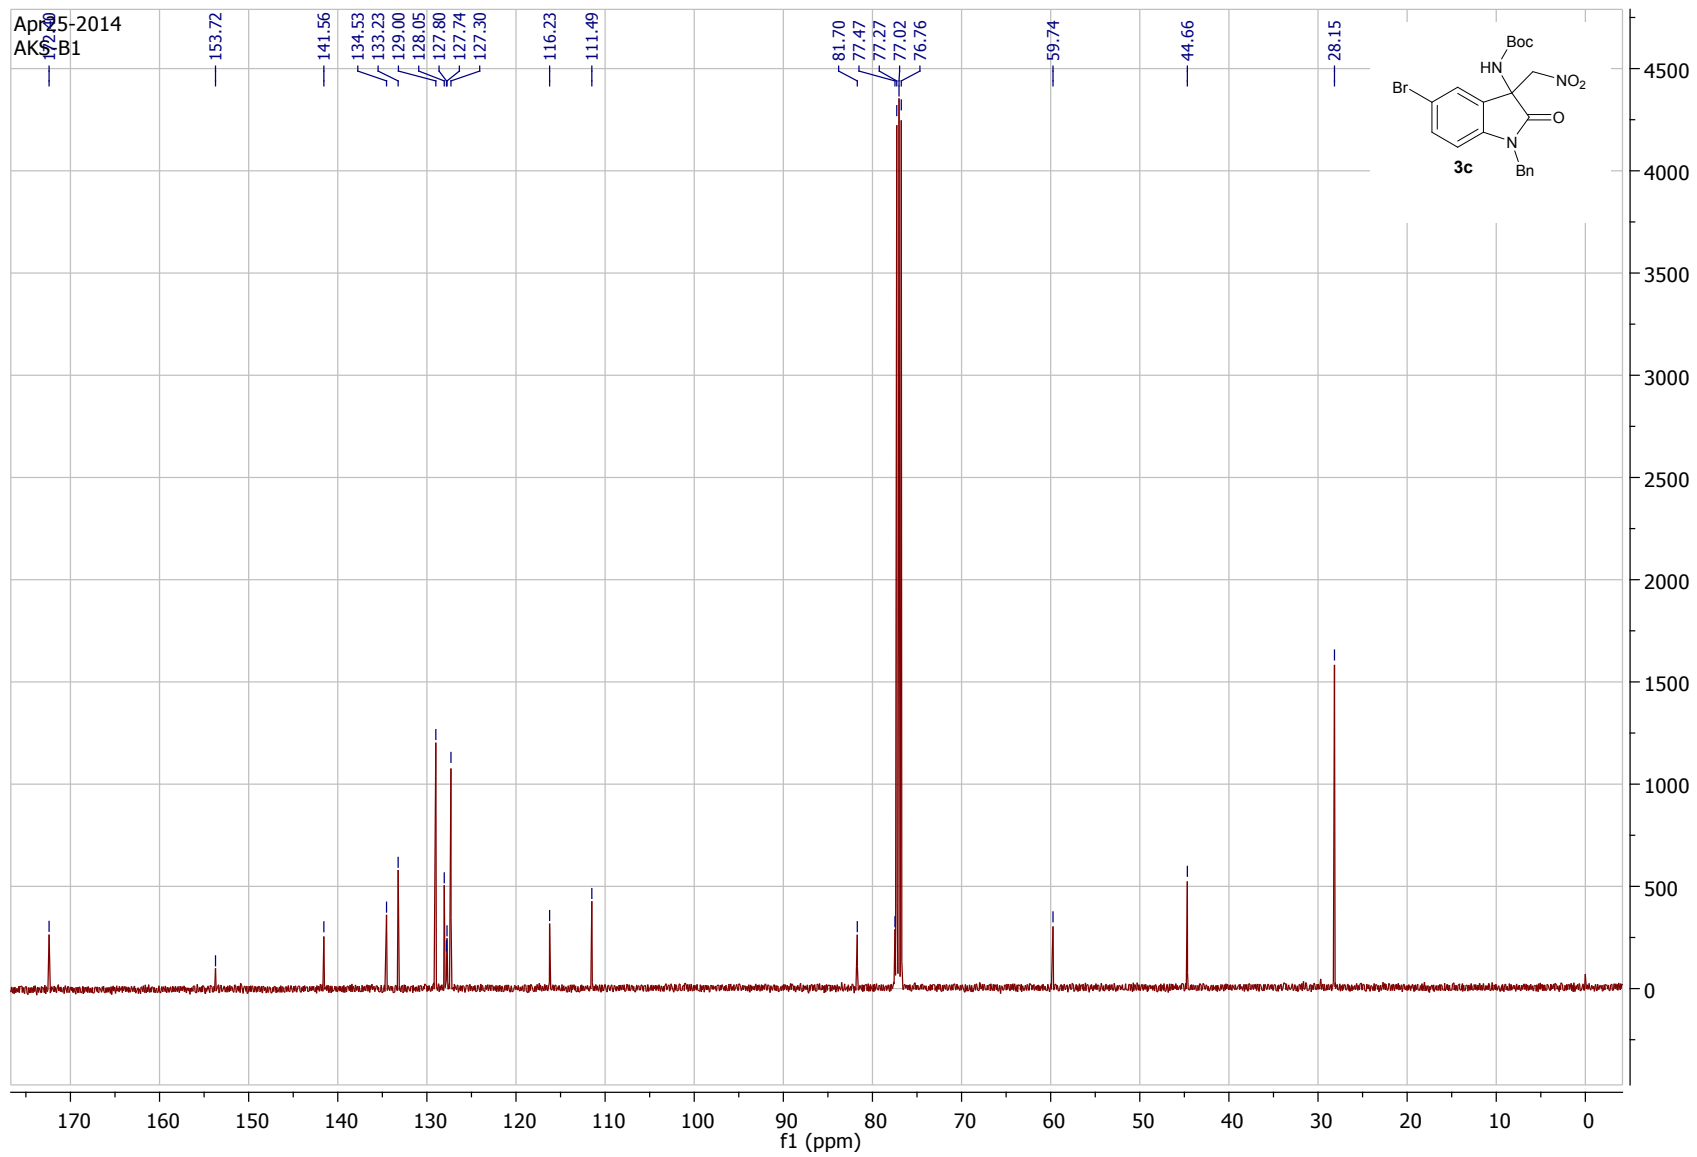

C:\Users\technologies\Desktop\nmrs\AKSB8.als

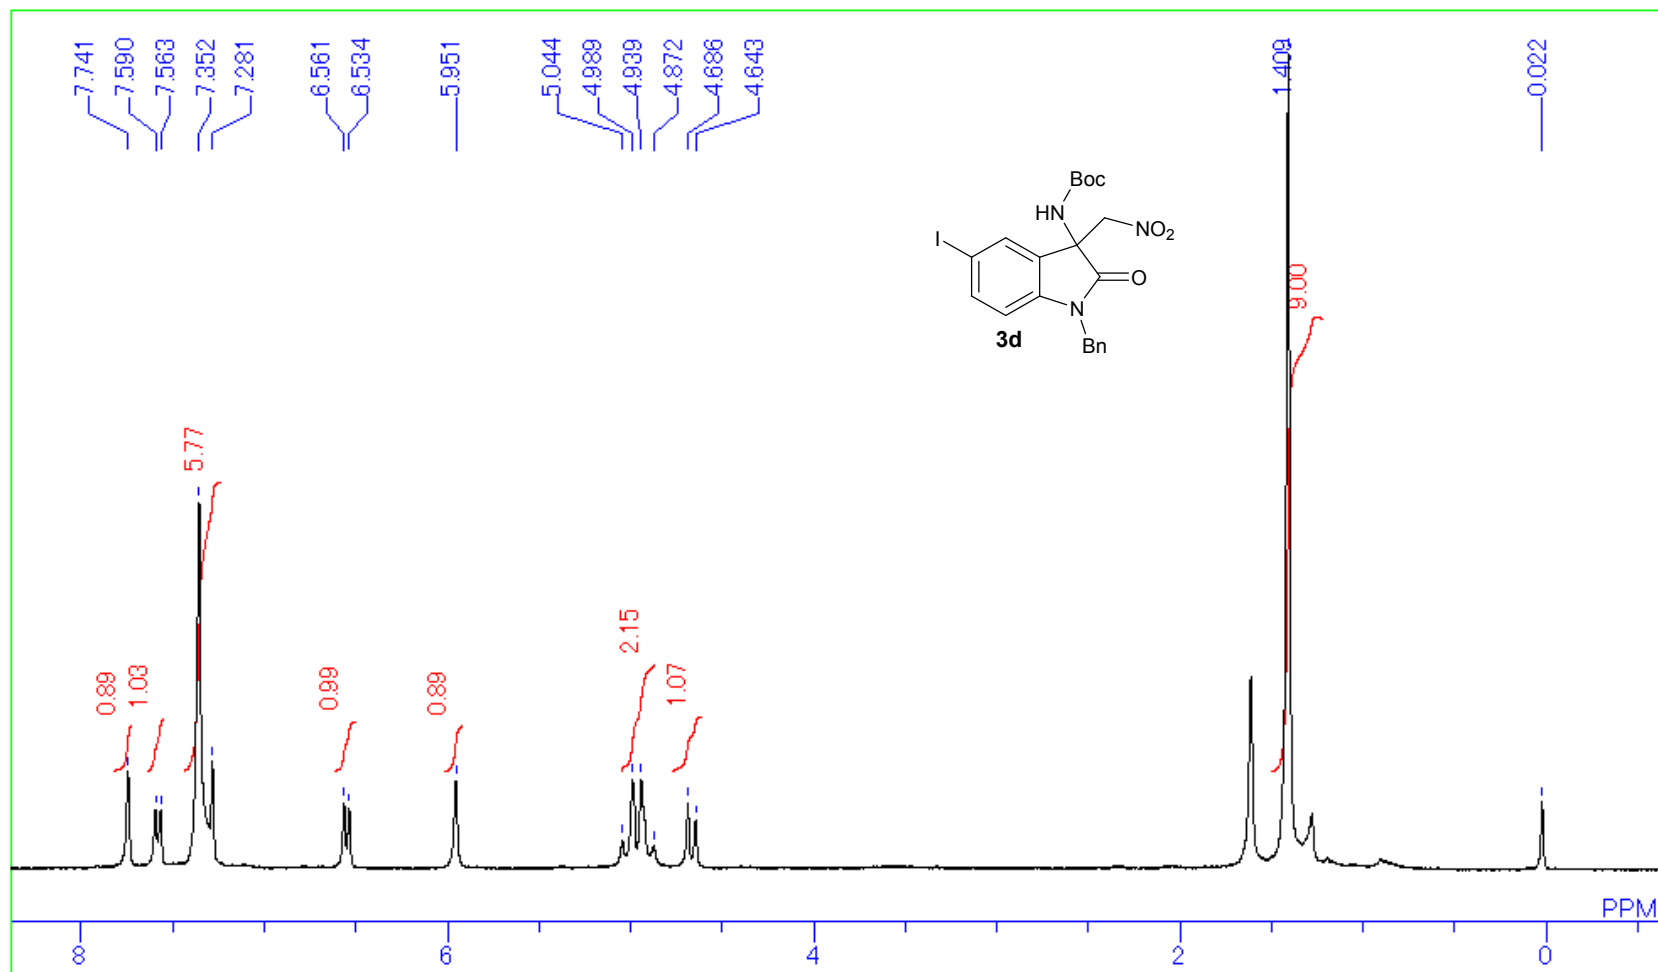

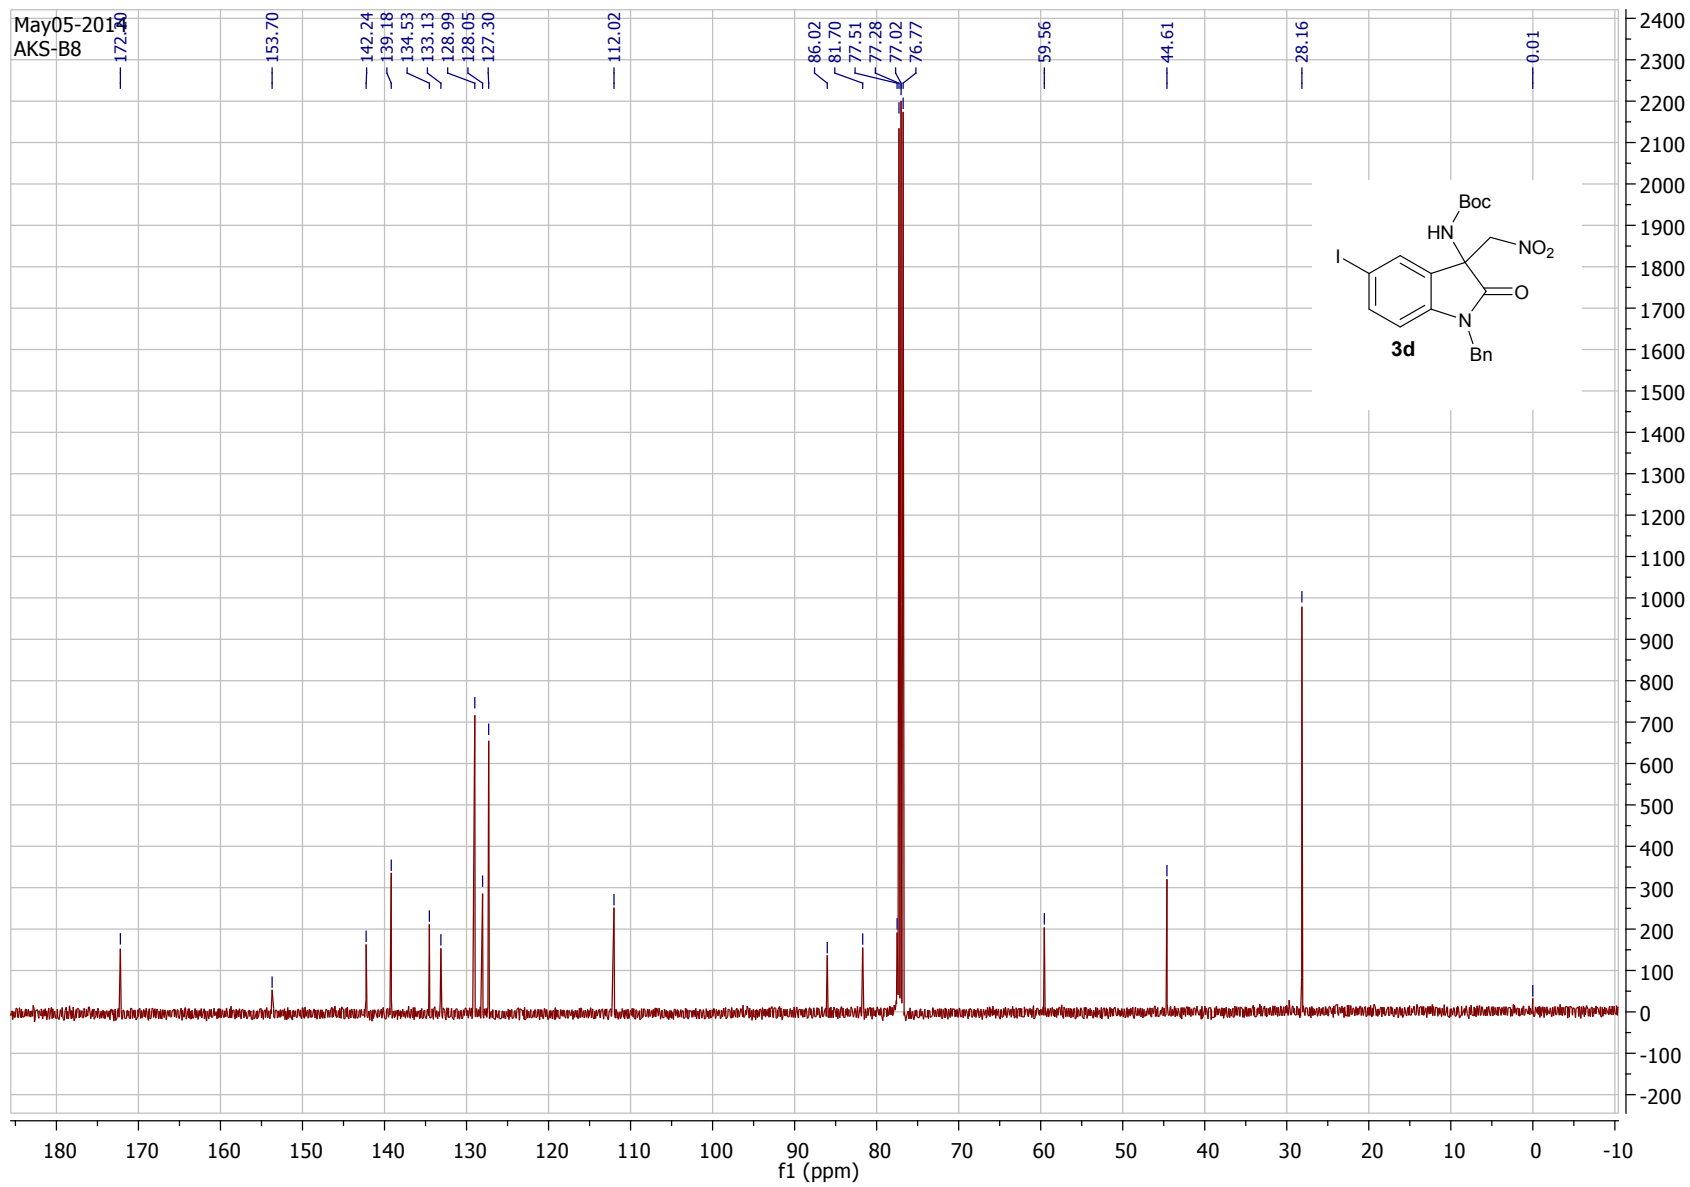

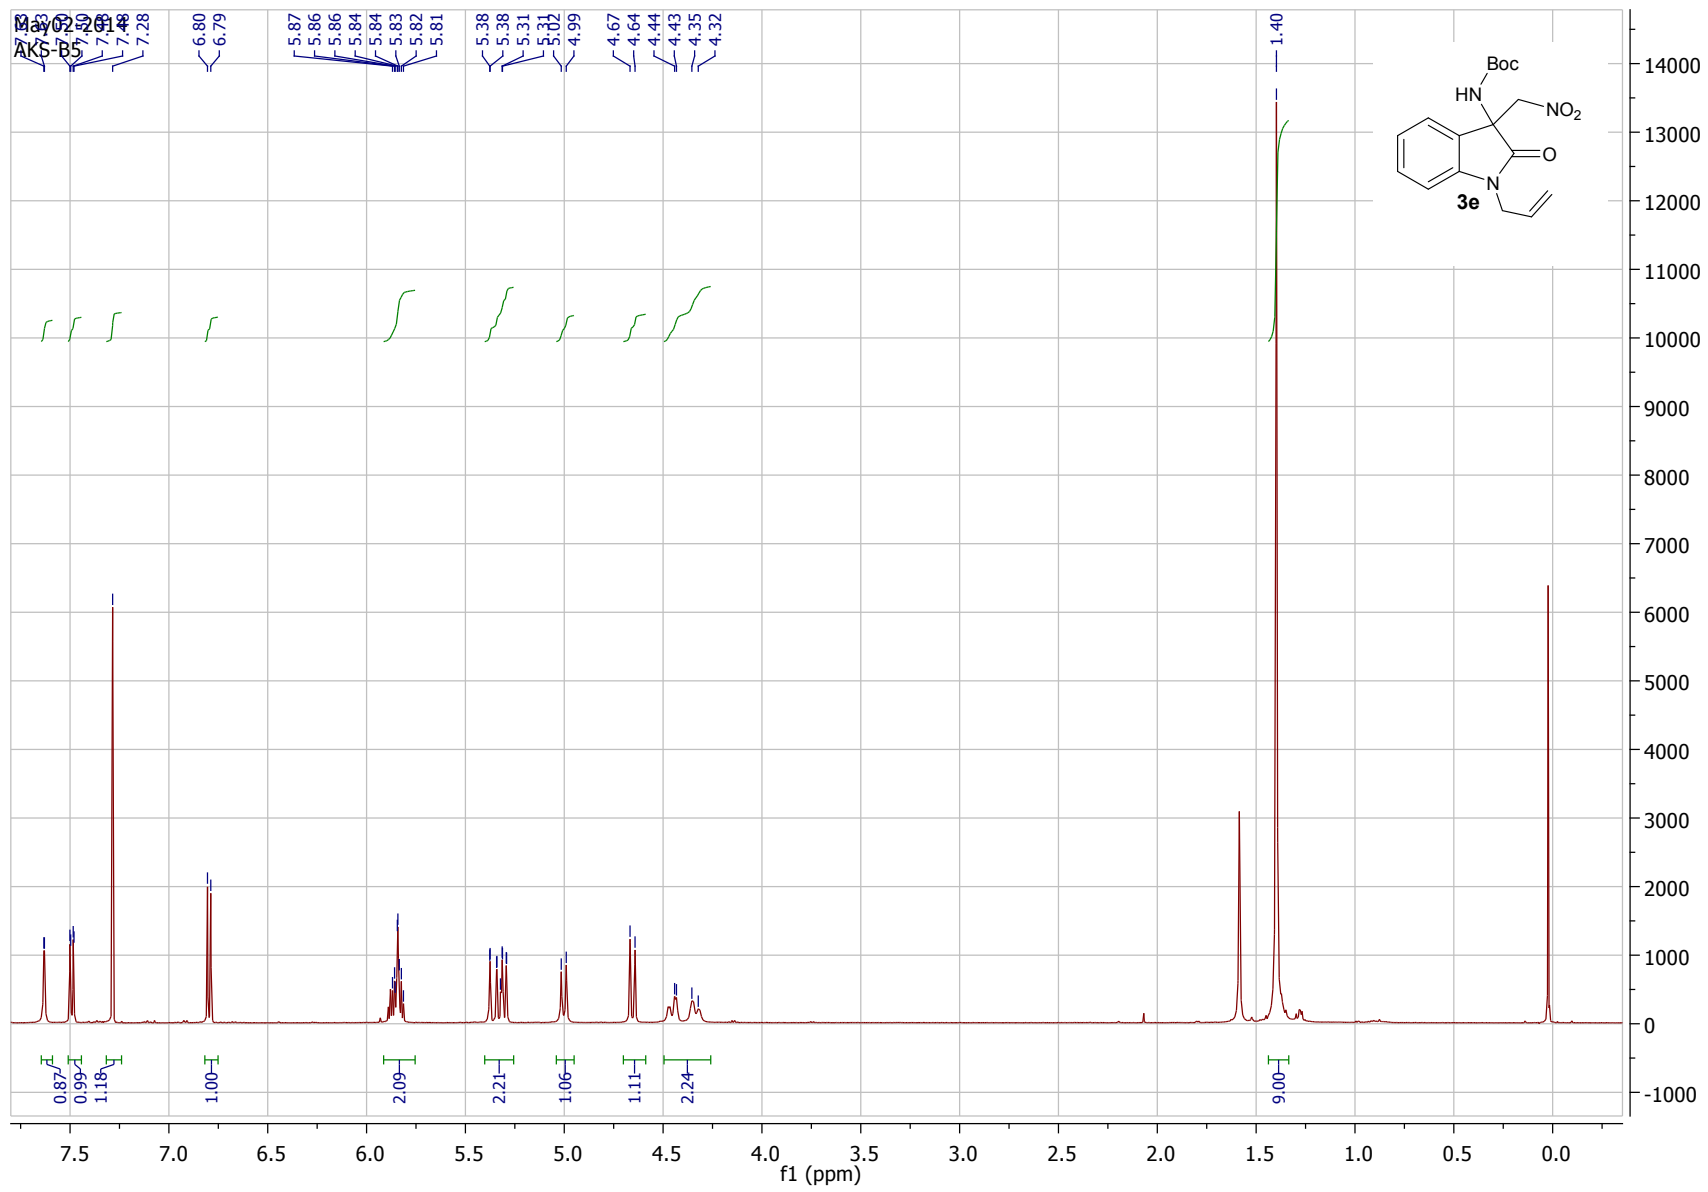



May 03, 2014  
AKS-B-4

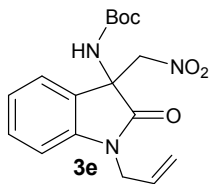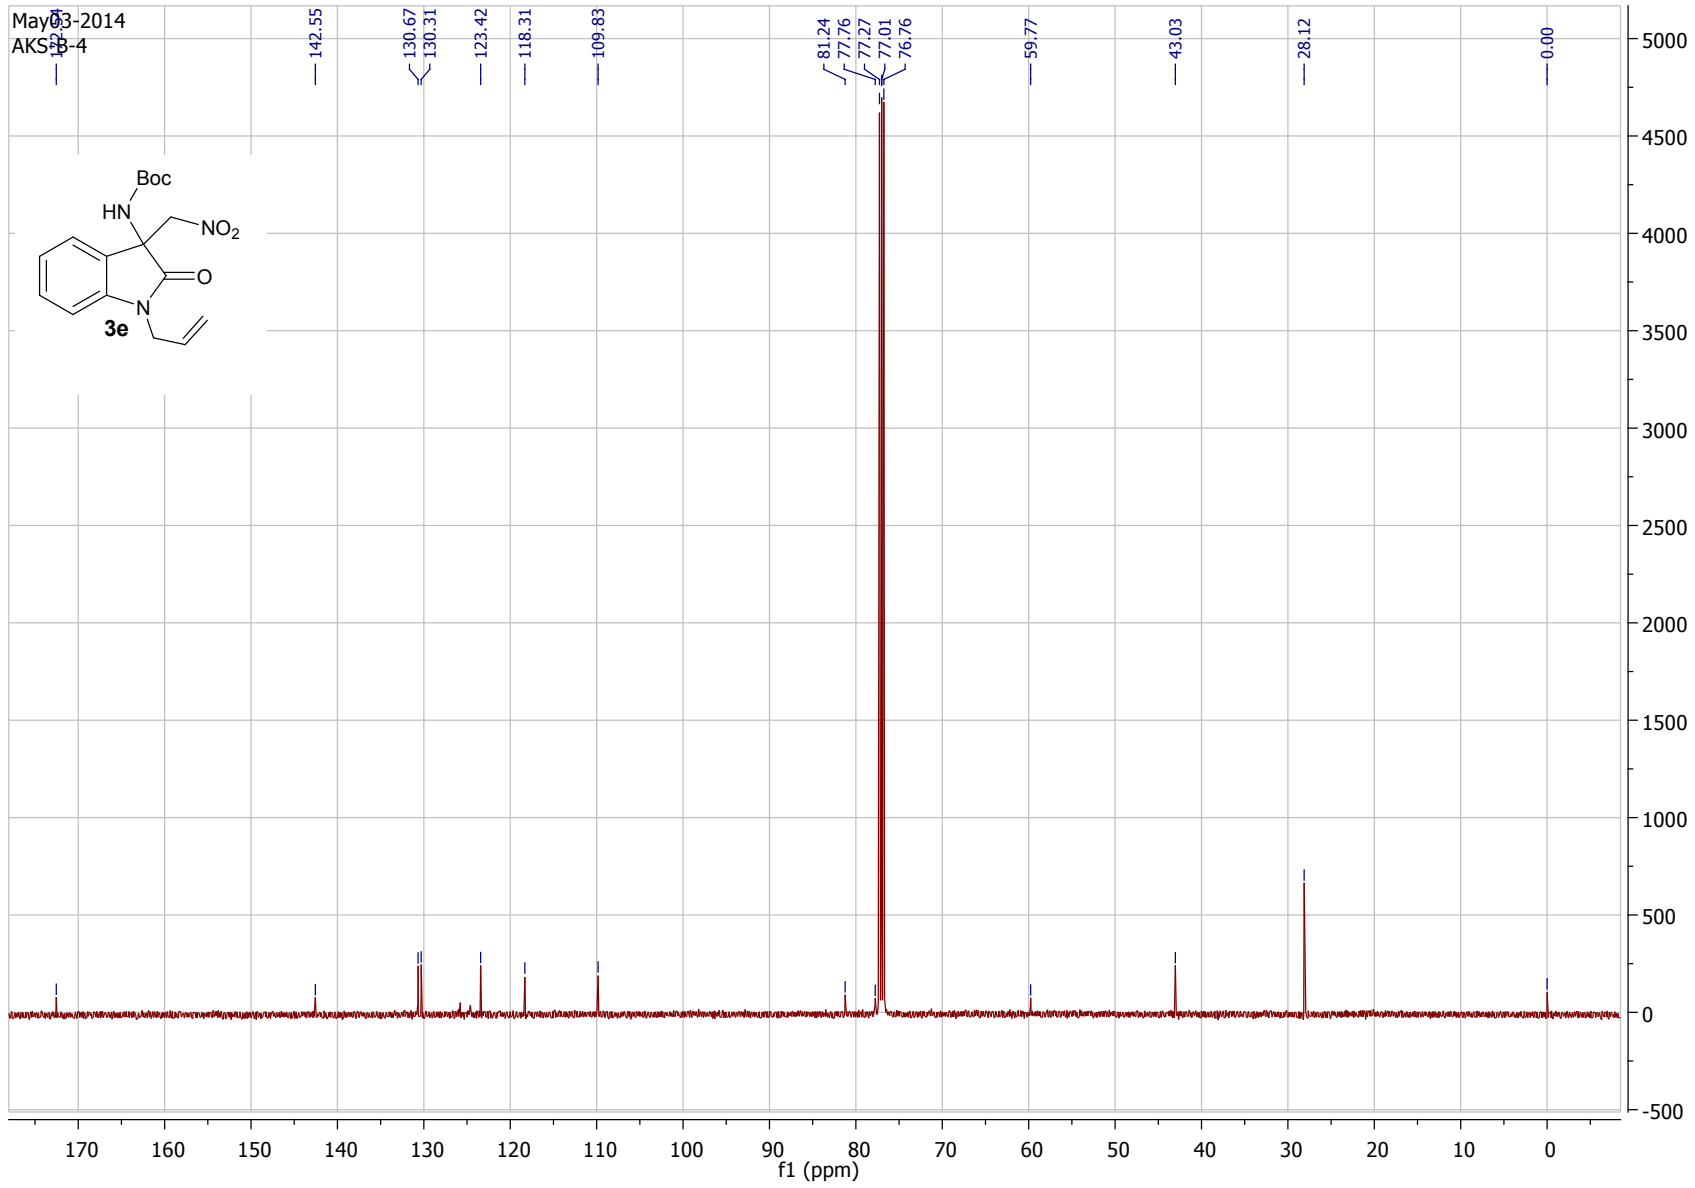

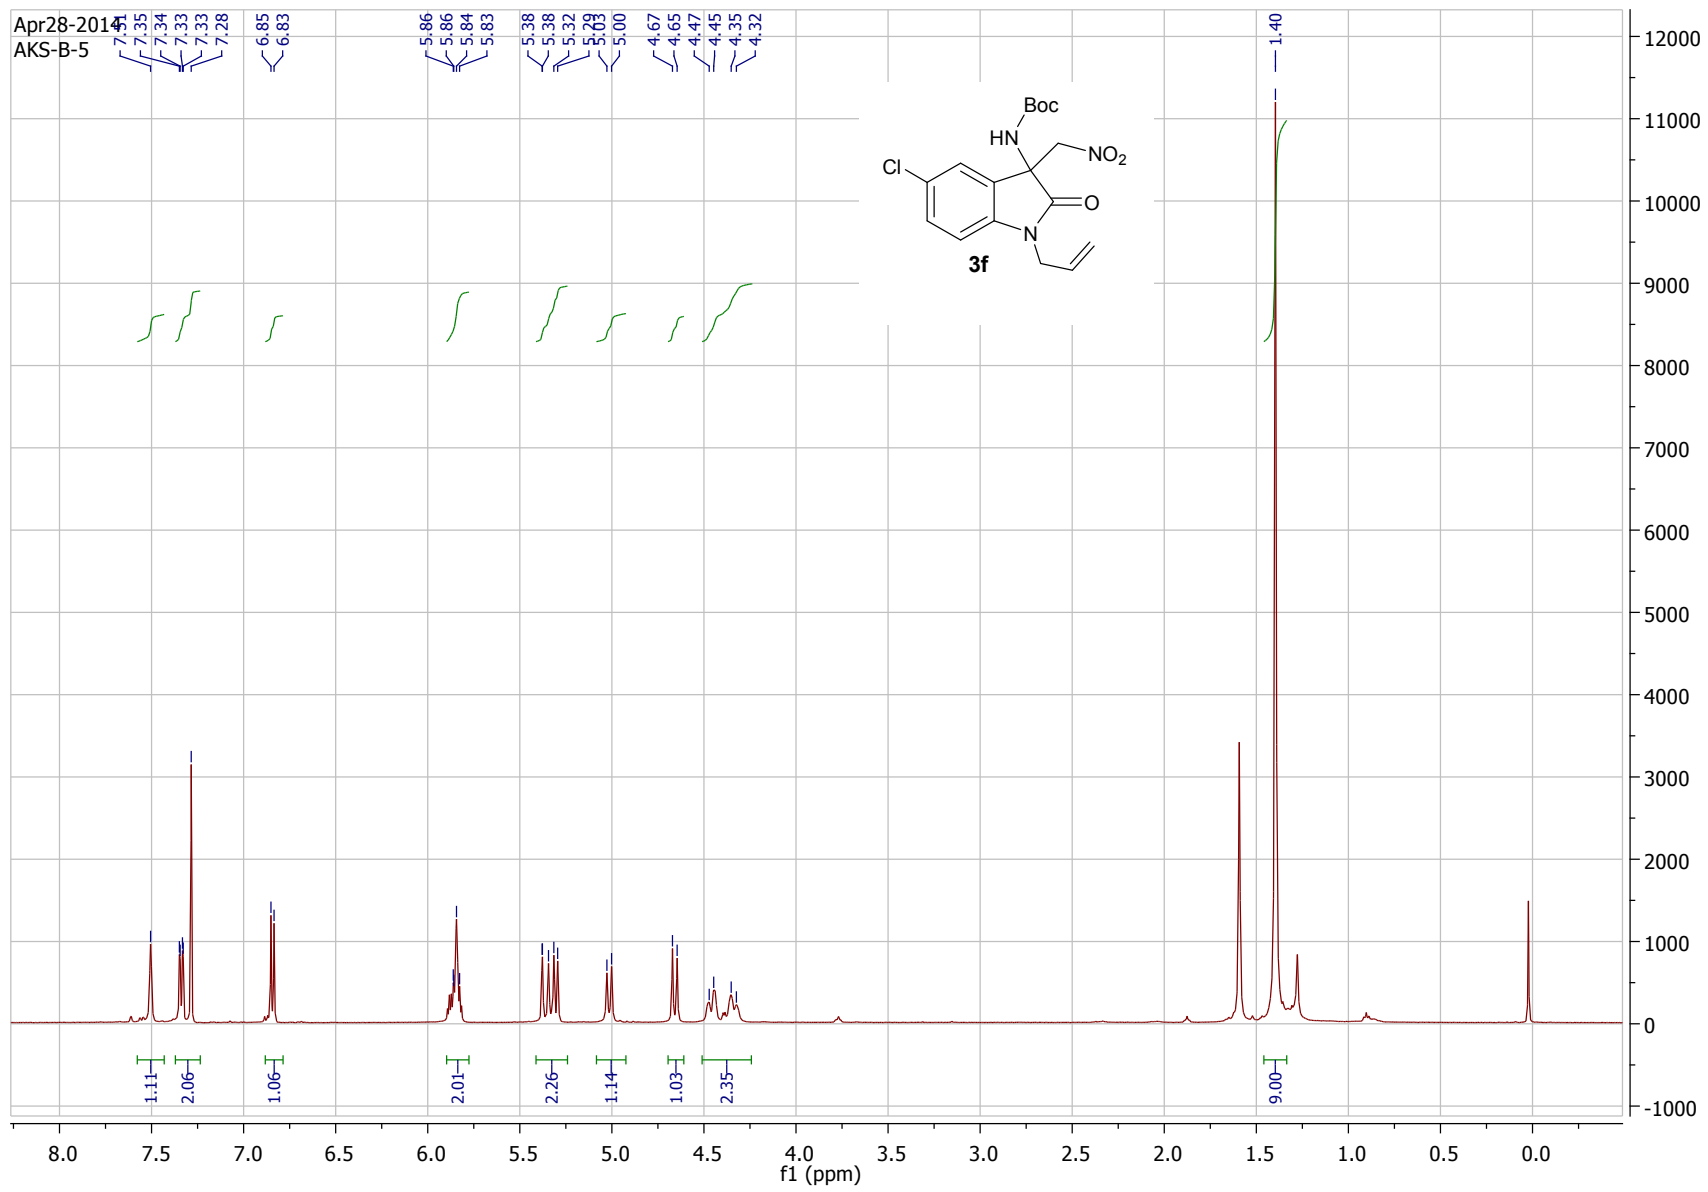

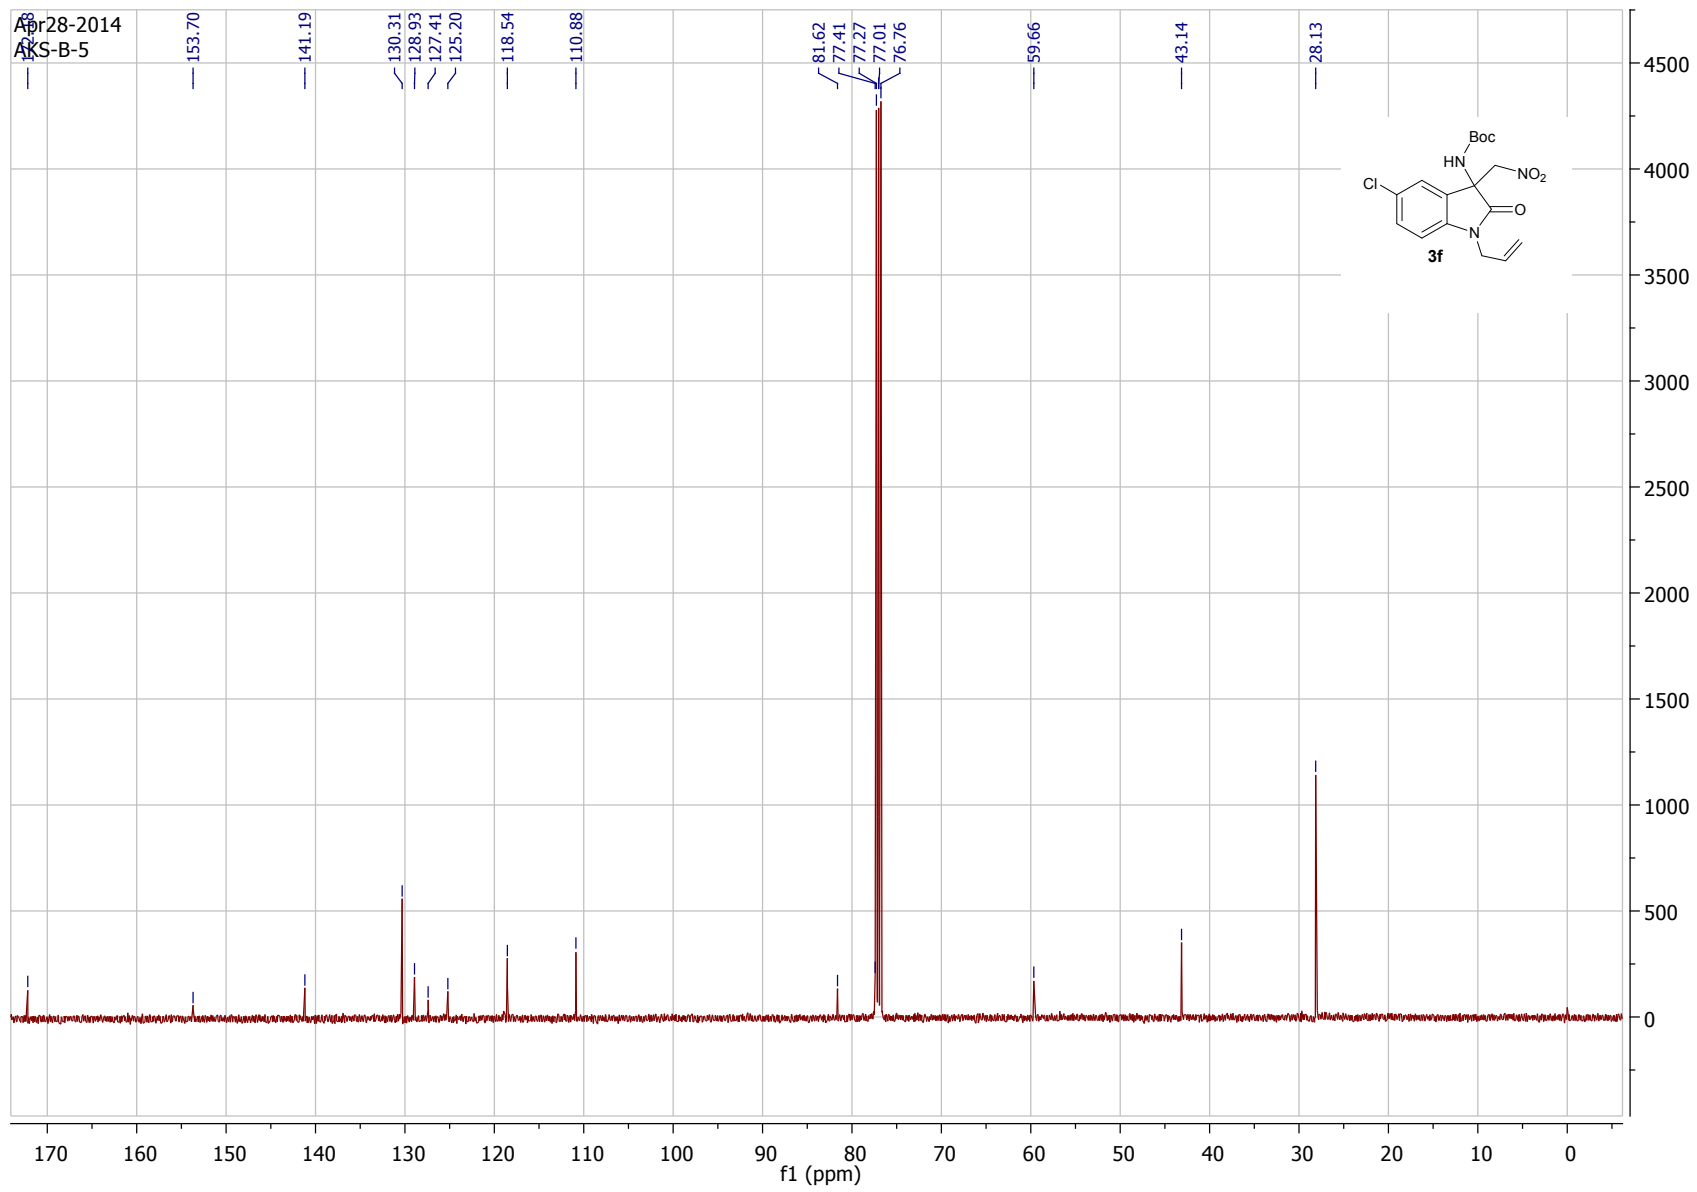

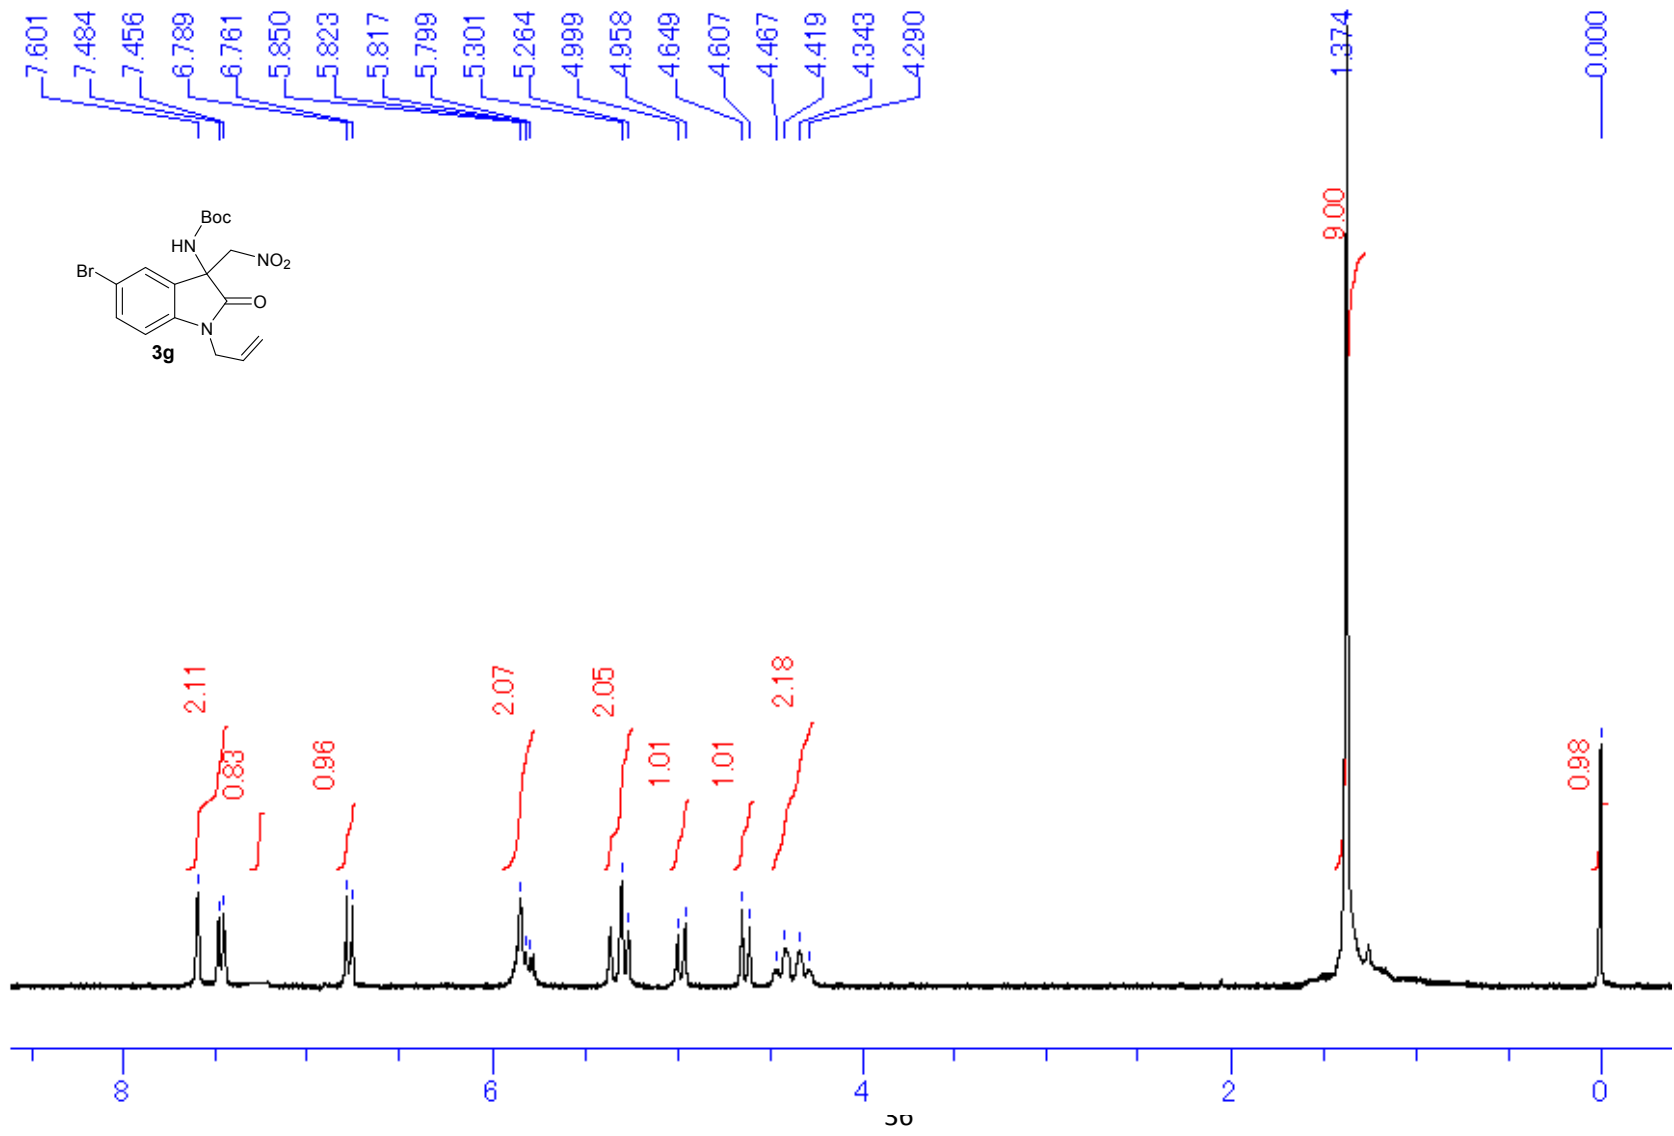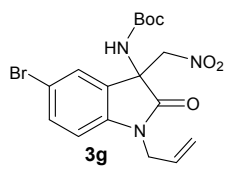

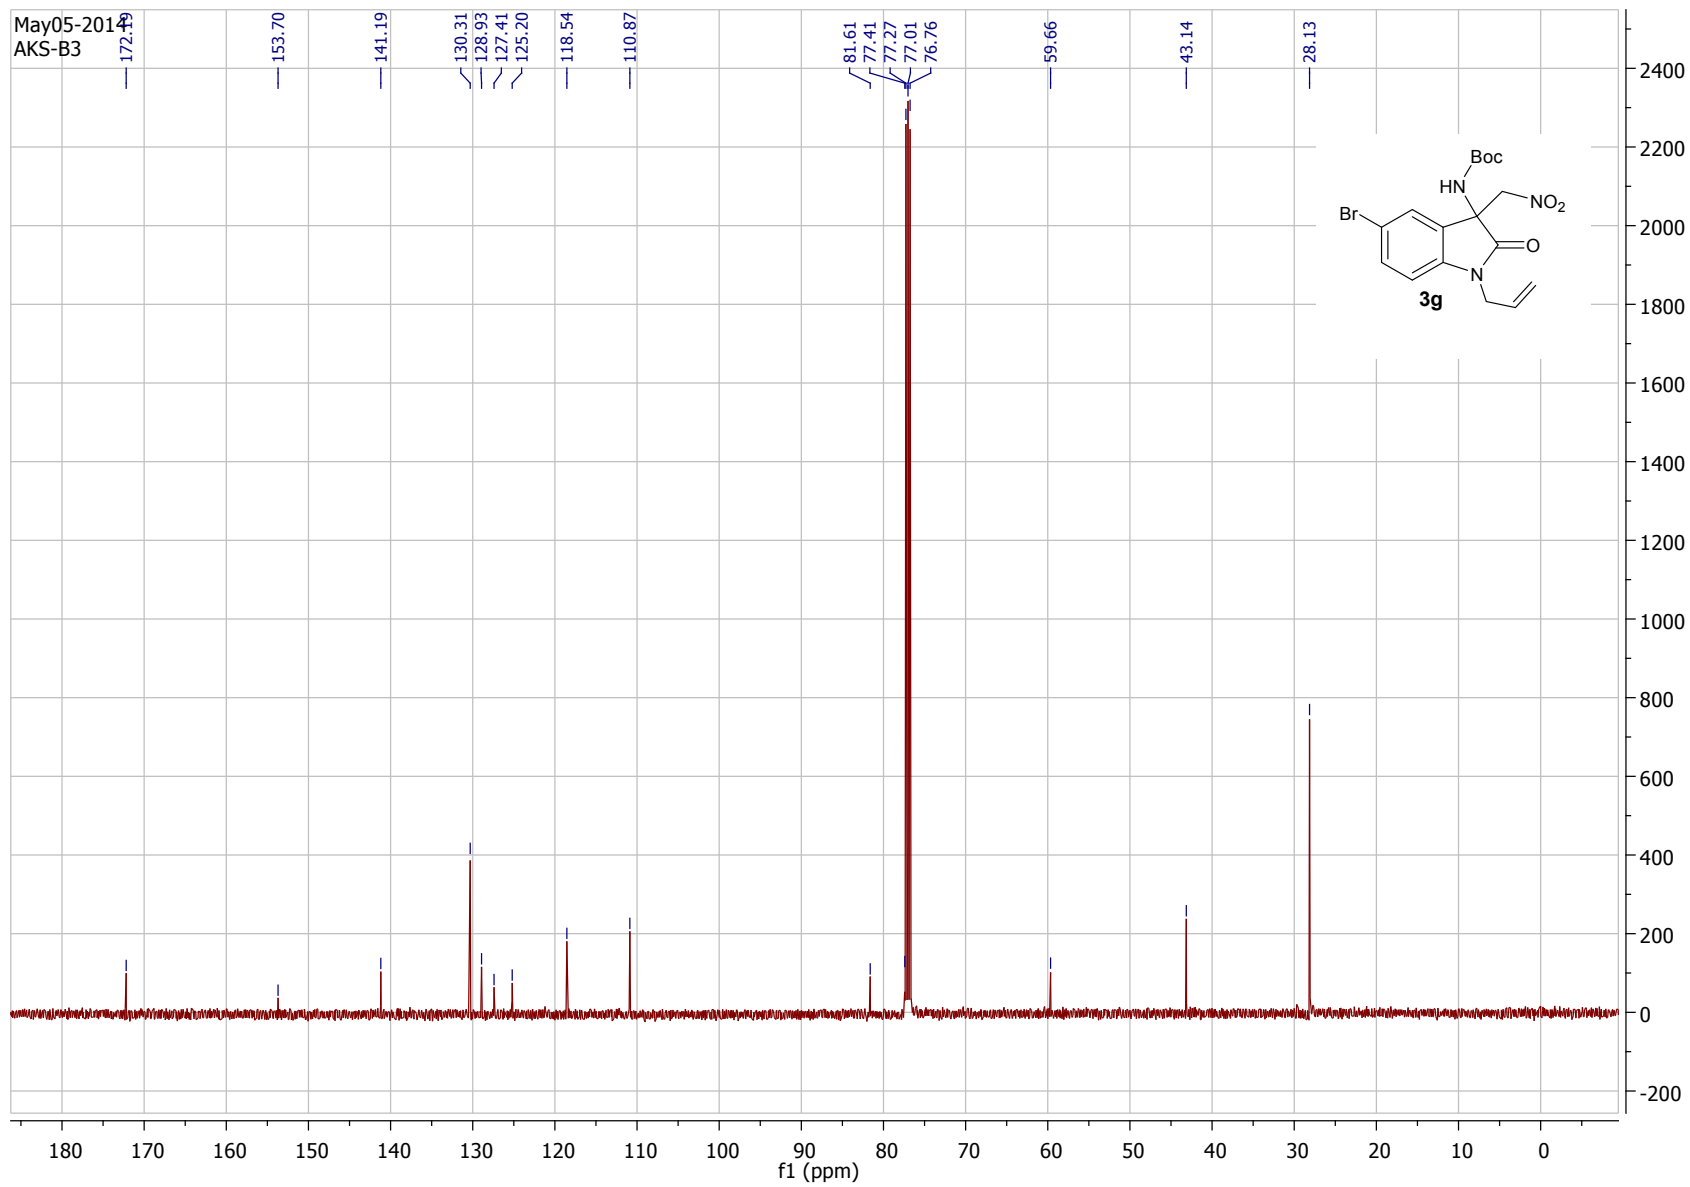

C:\Users\technologies\Desktop\nmrs\Dr\_Chimni\ c-aksb71NON\_E1\_FT.als

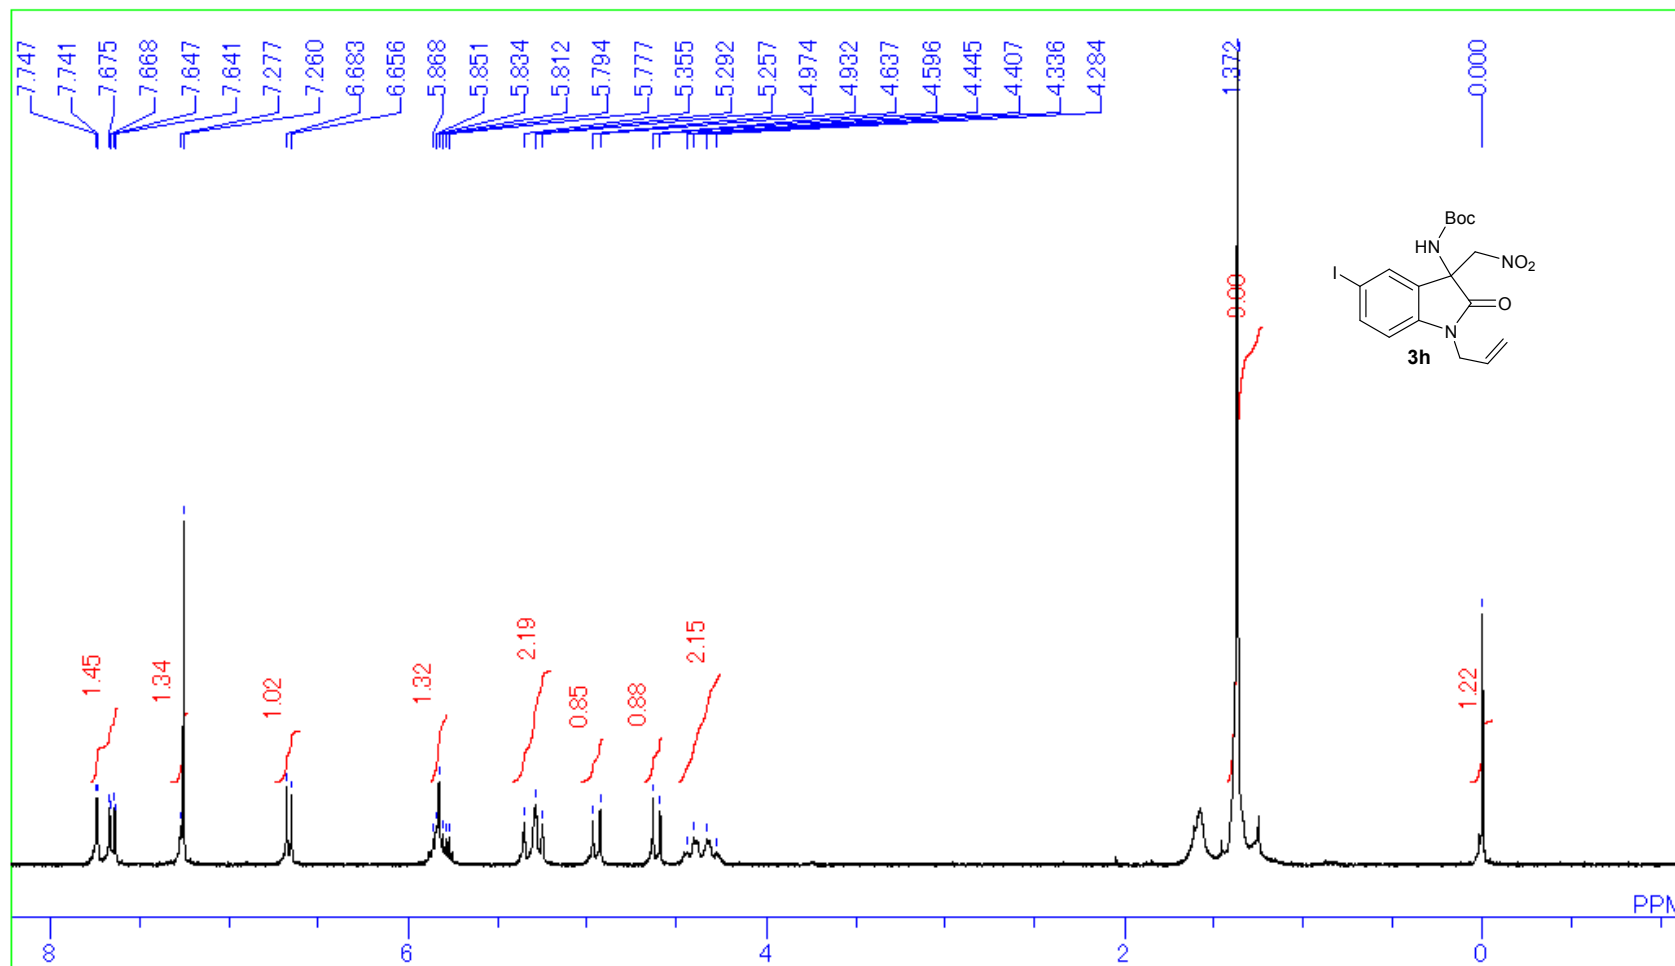

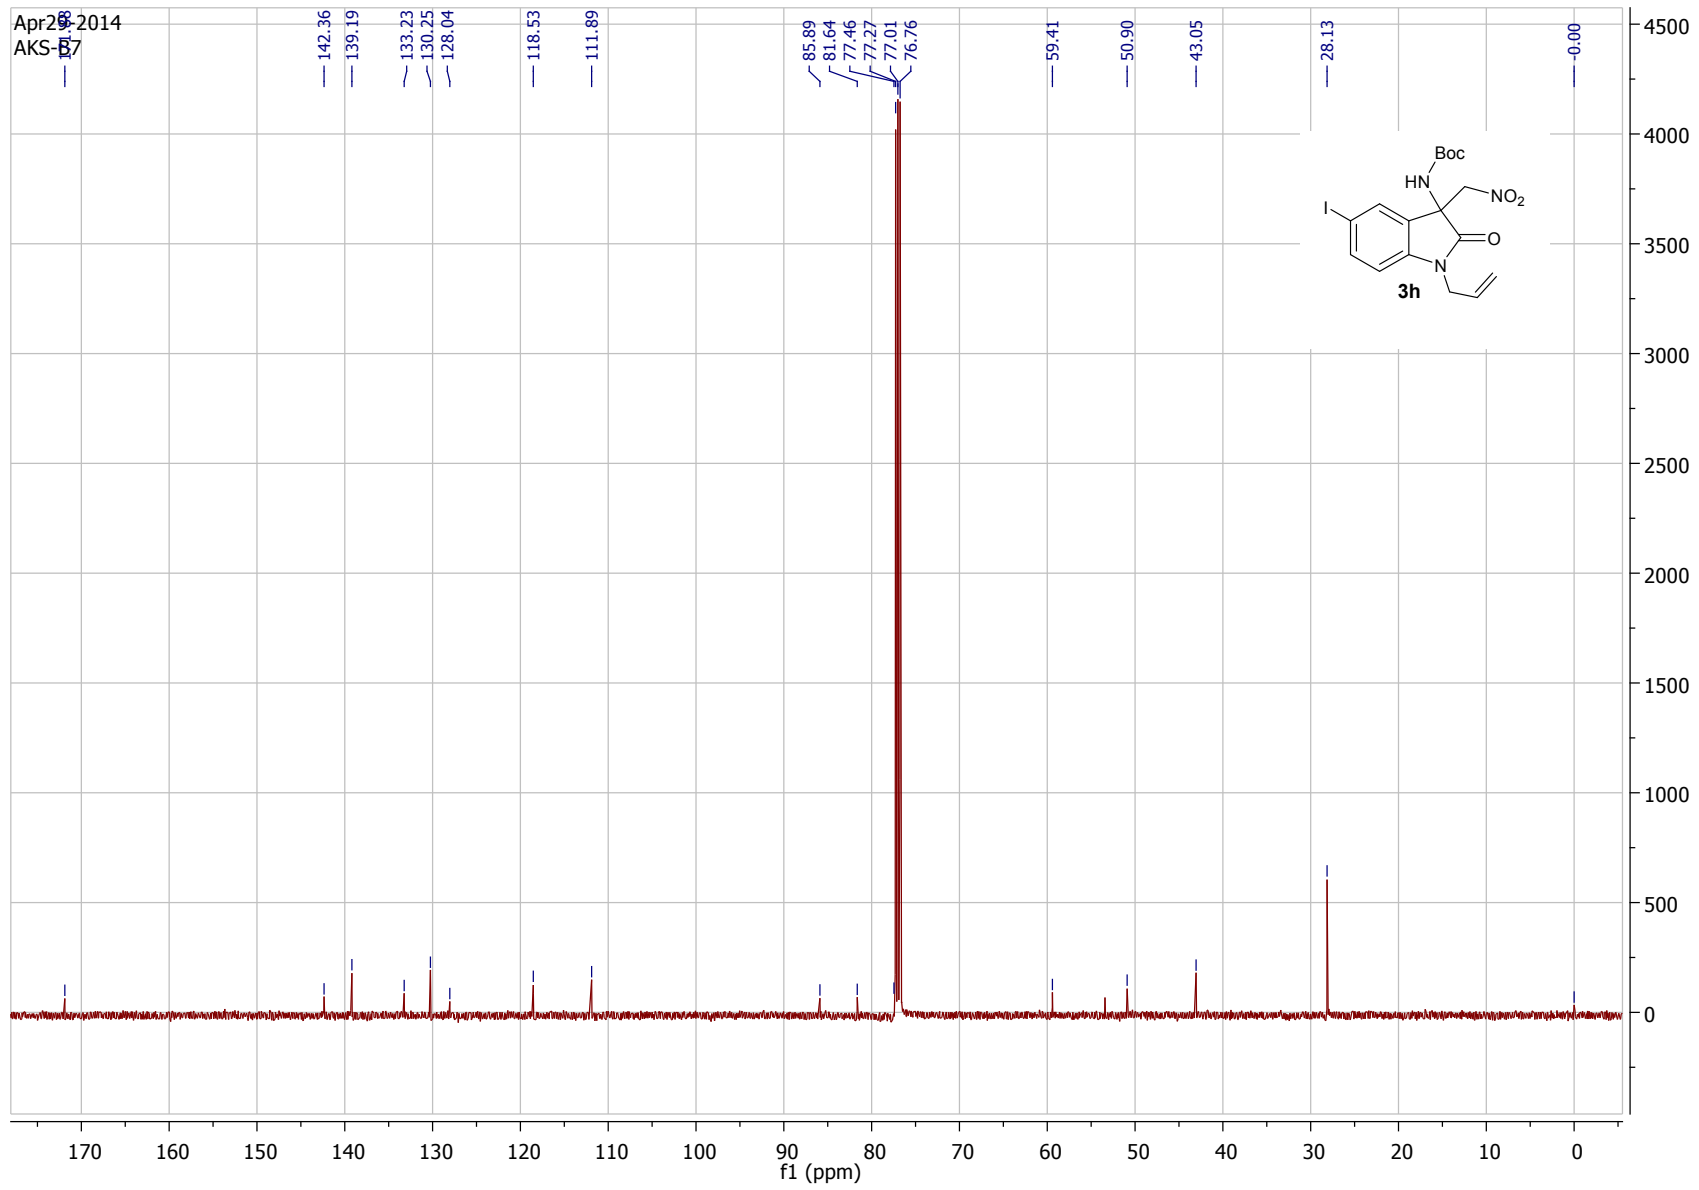

C:\Users\technologies\Desktop\nmrs\Dr\_Chimni\ C-AKSB21NON\_E2\_FT.als

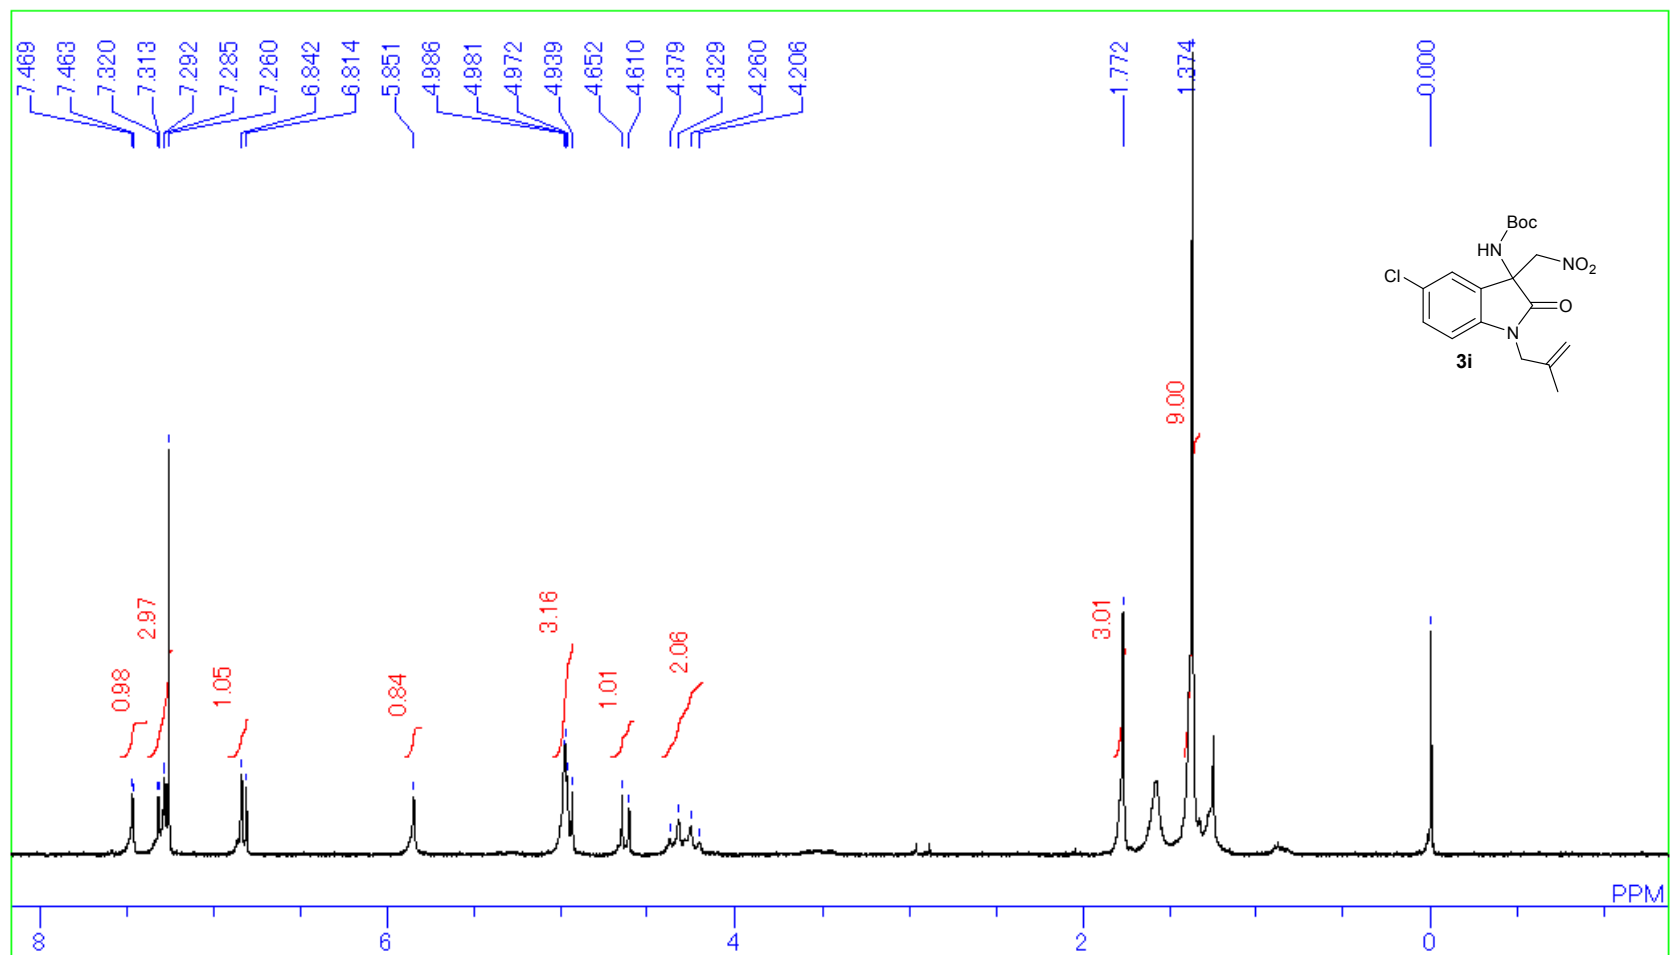



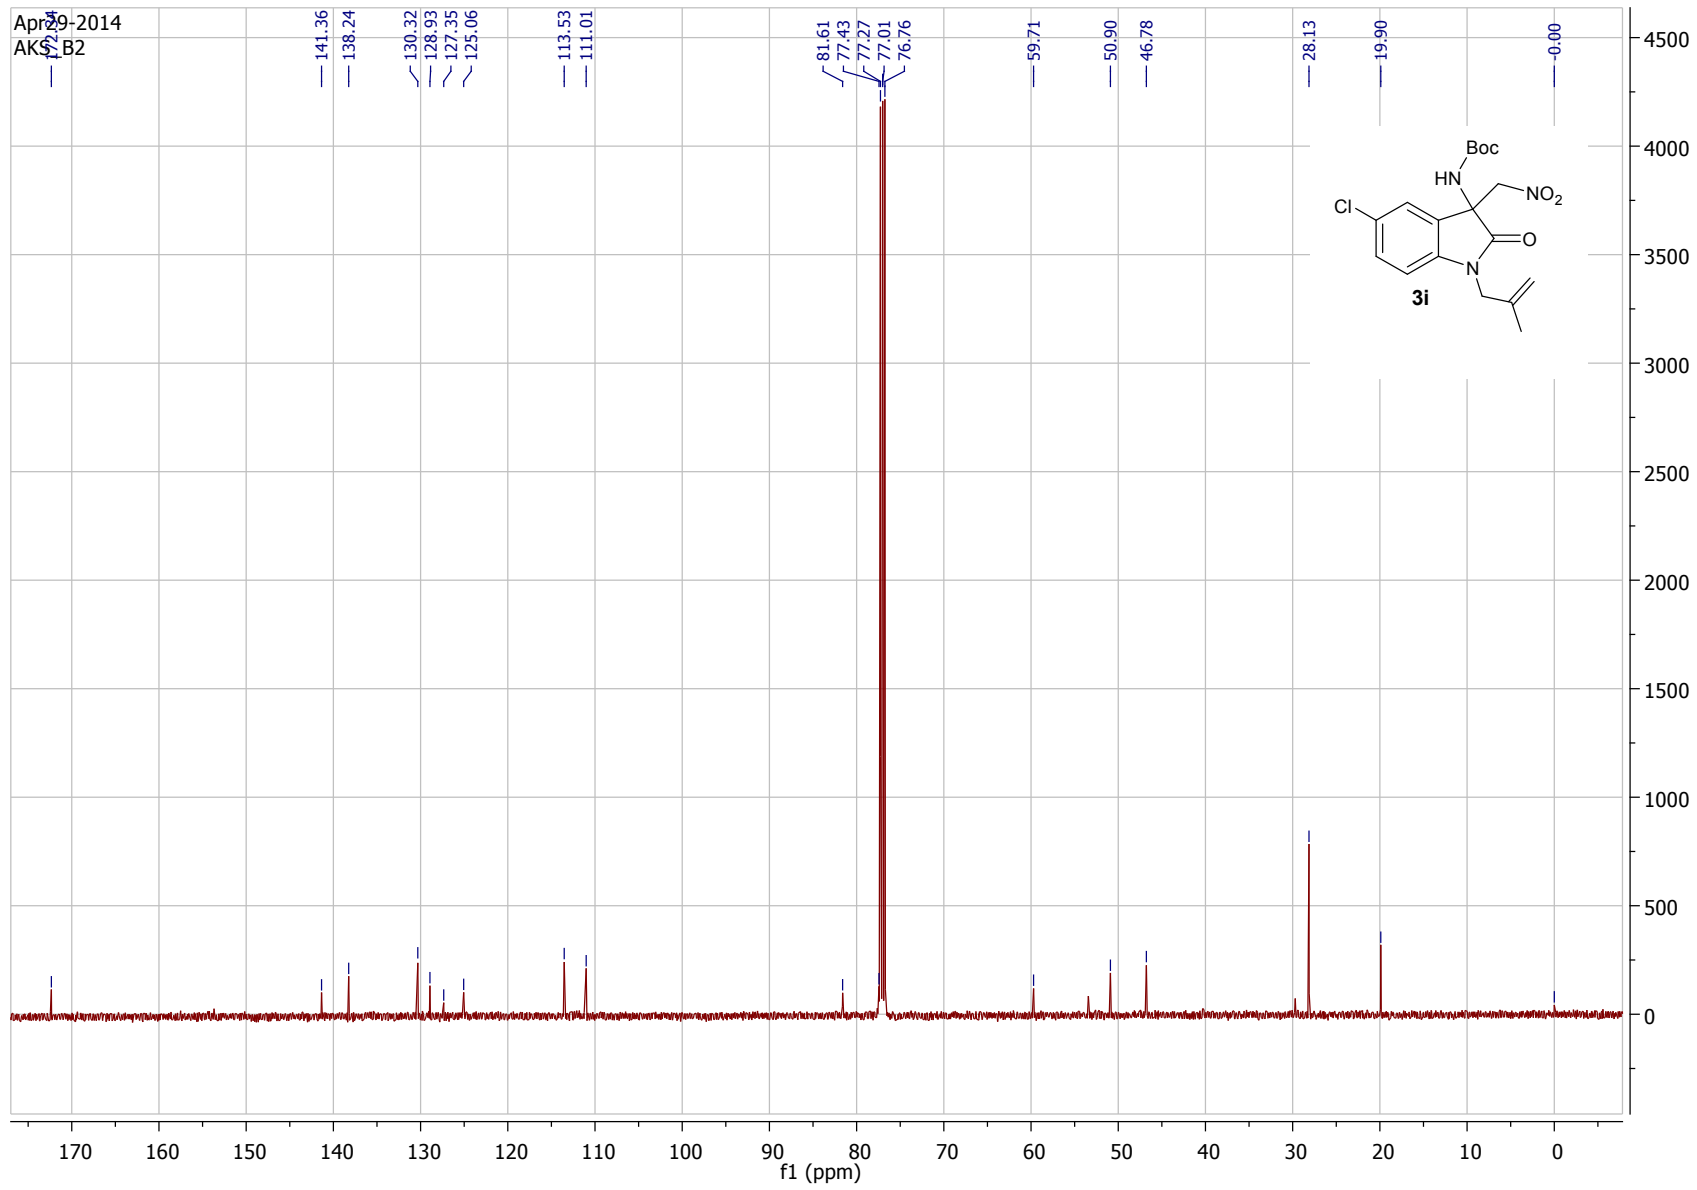

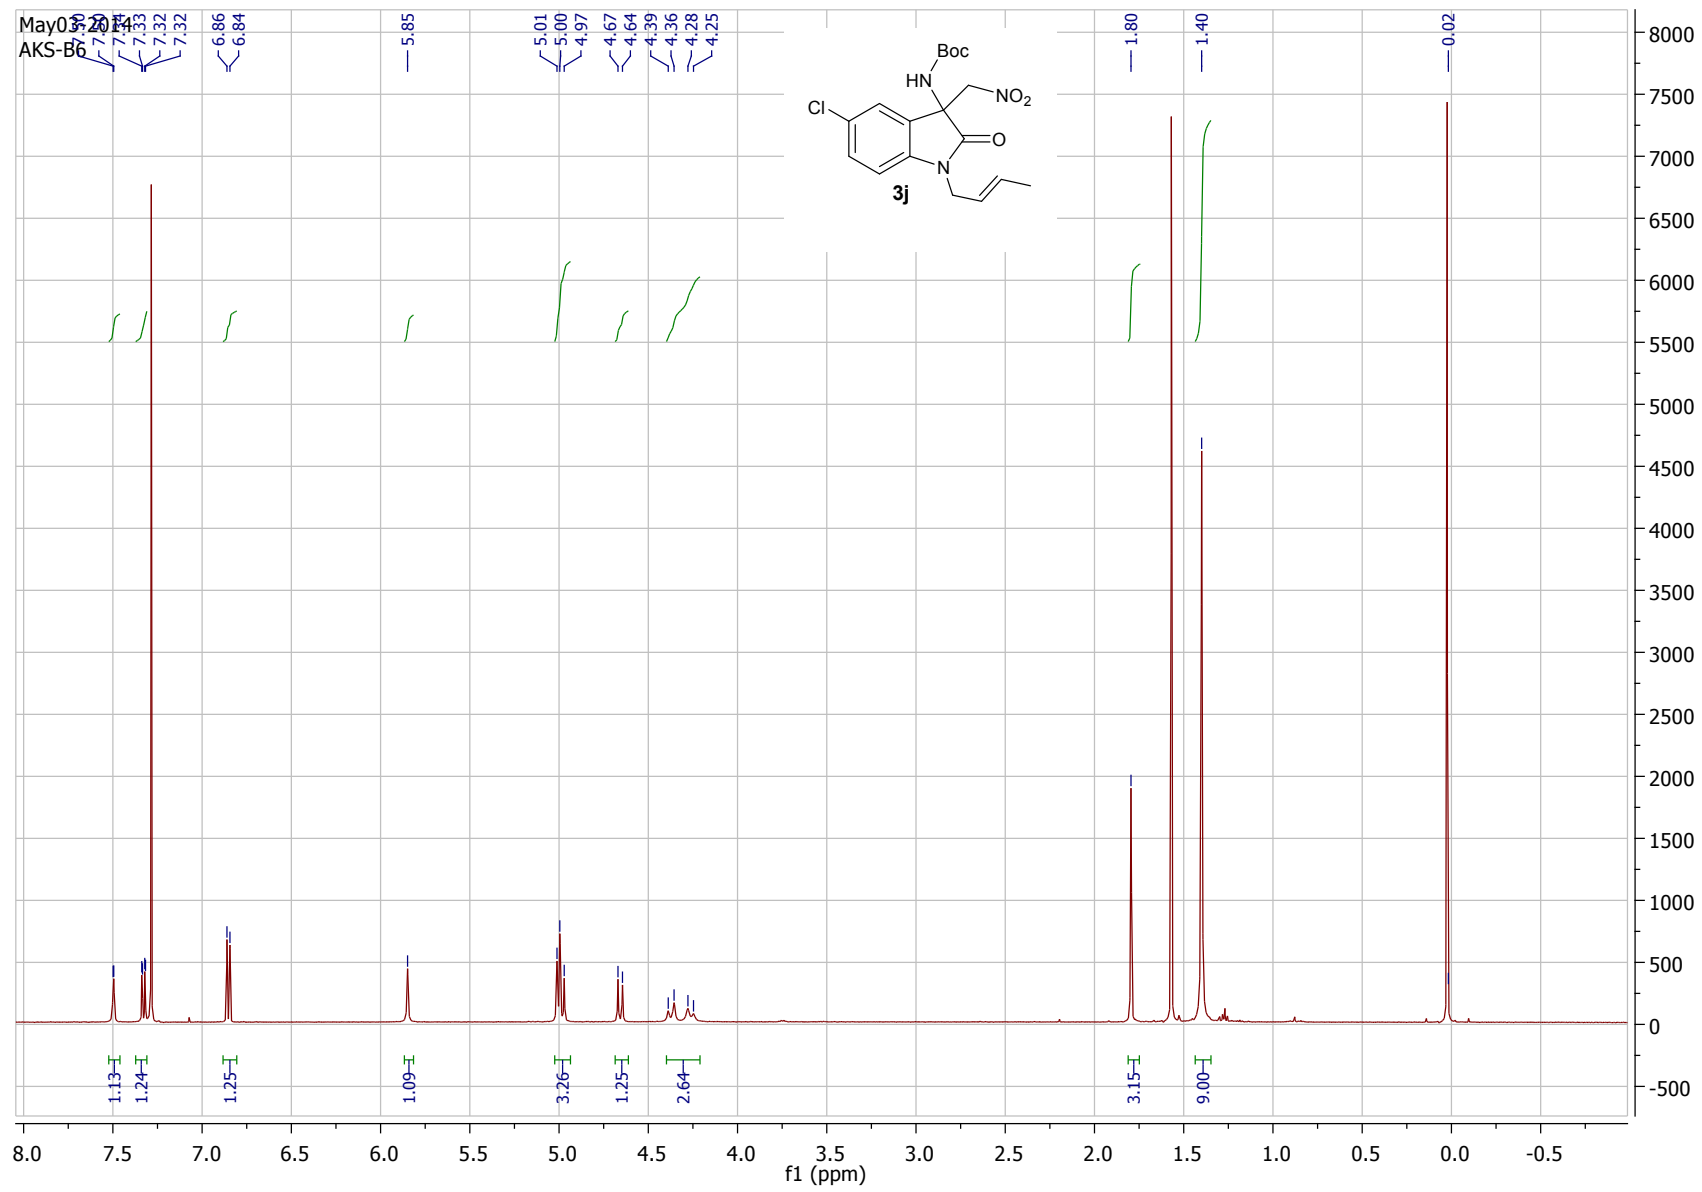



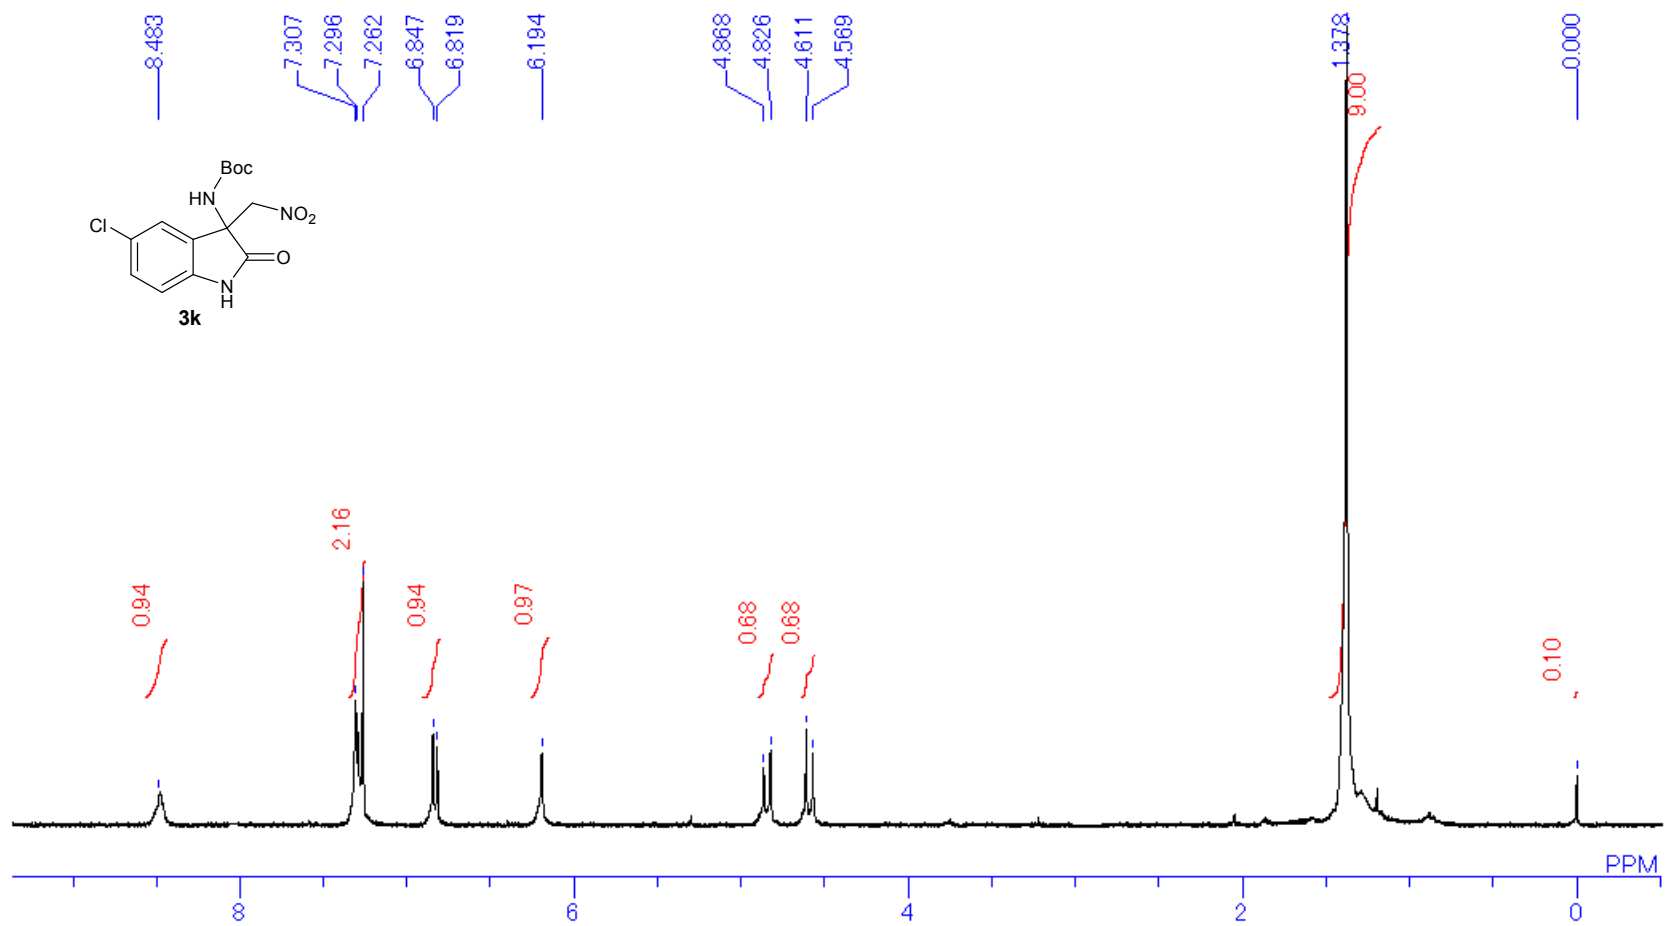

AKS-B13

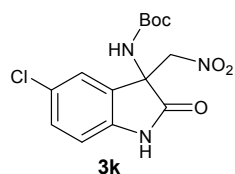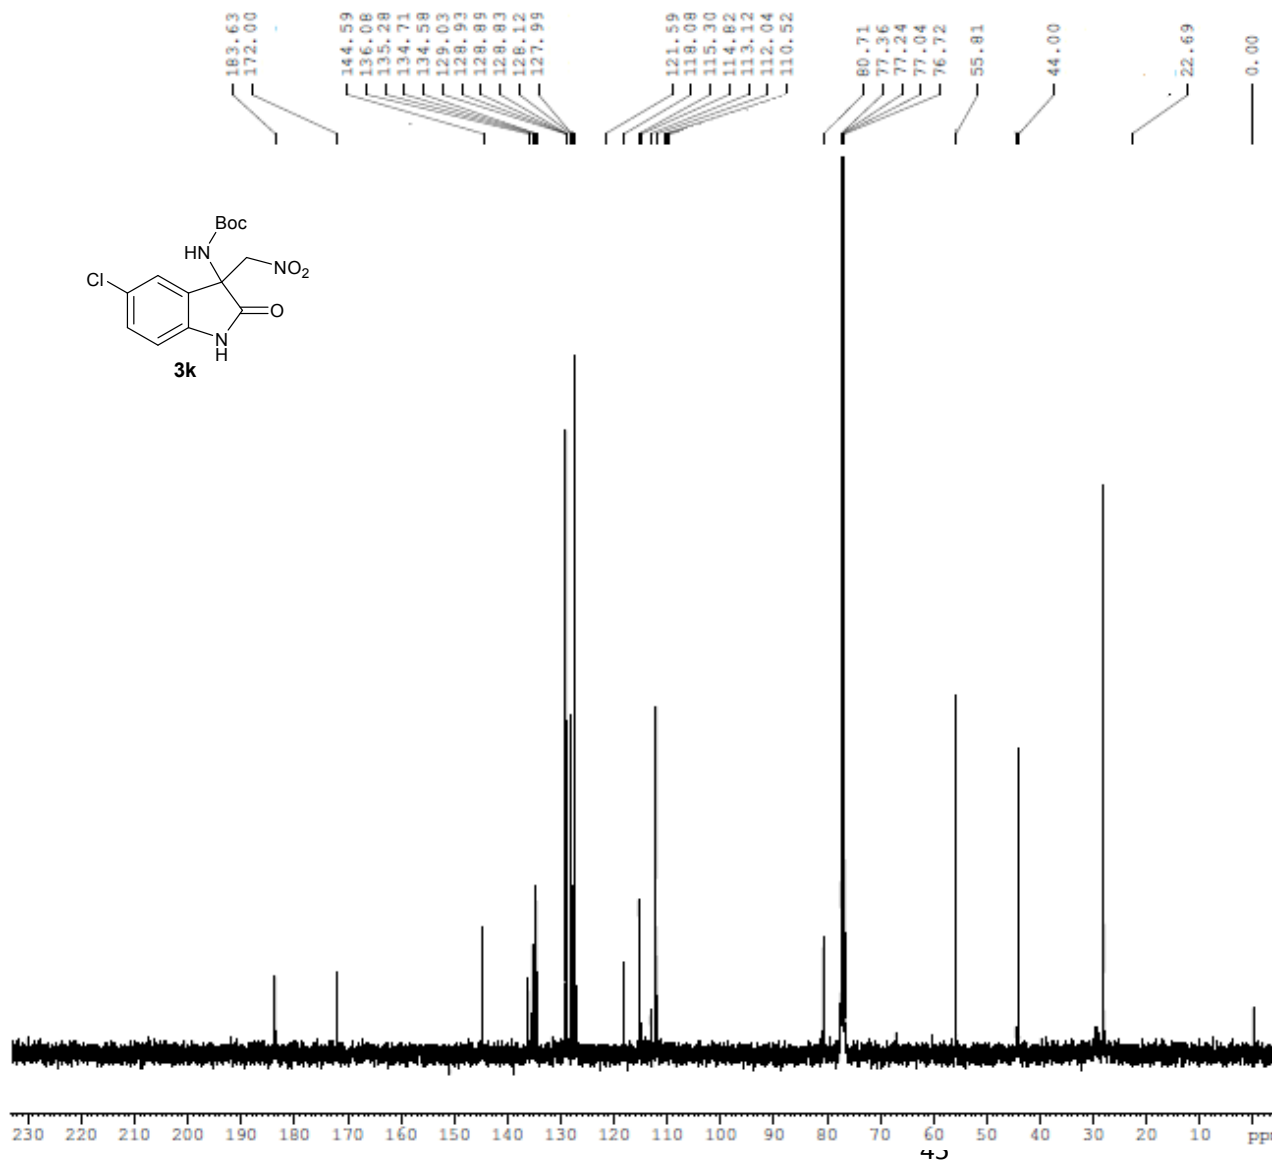

BRUKER  
AVANCE II 400 NMR  
Spectrometer  
SAIF  
Panjab University  
Chandigarh

Current Data Parameters  
NAME Jan08-2014  
EXPNO 321  
PROCNO 1

F2 - Acquisition Parameters  
Date\_ 20140109  
Time 3.01  
INSTRUM spect  
PROBHD 5 mm PABBO BB-  
PULPROG zgpg30  
ID 65536  
SOLVENT CDCl3  
NS 1024  
DS 4  
SWH 29761.904 Hz  
FIDRES 0.454131 Hz  
AQ 1.1010548 sec  
RG 1030  
DW 16.800 usec  
DE 6.00 usec  
TE 294.5 K  
D1 2.00000000 sec  
d11 0.03000000 sec  
DELTA 1.89999998 sec  
TD0 1

----- CHANNEL f1 -----  
NUC1 13C  
P1 9.60 usec  
PL1 -2.00 dB  
SFO1 100.6228298 MHz

----- CHANNEL f2 -----  
CPDPRG2 waltz16  
NUC2 1H  
PCPD2 80.00 usec  
PL2 -3.00 dB  
PL12 14.31 dB  
PL13 18.00 dB  
SFO2 400.1316005 MHz

F2 - Processing parameters  
SI 32768  
SF 100.6127709 MHz  
WDW EM  
SSB 0  
LB 1.00 Hz  
GB 0  
PC 1.40

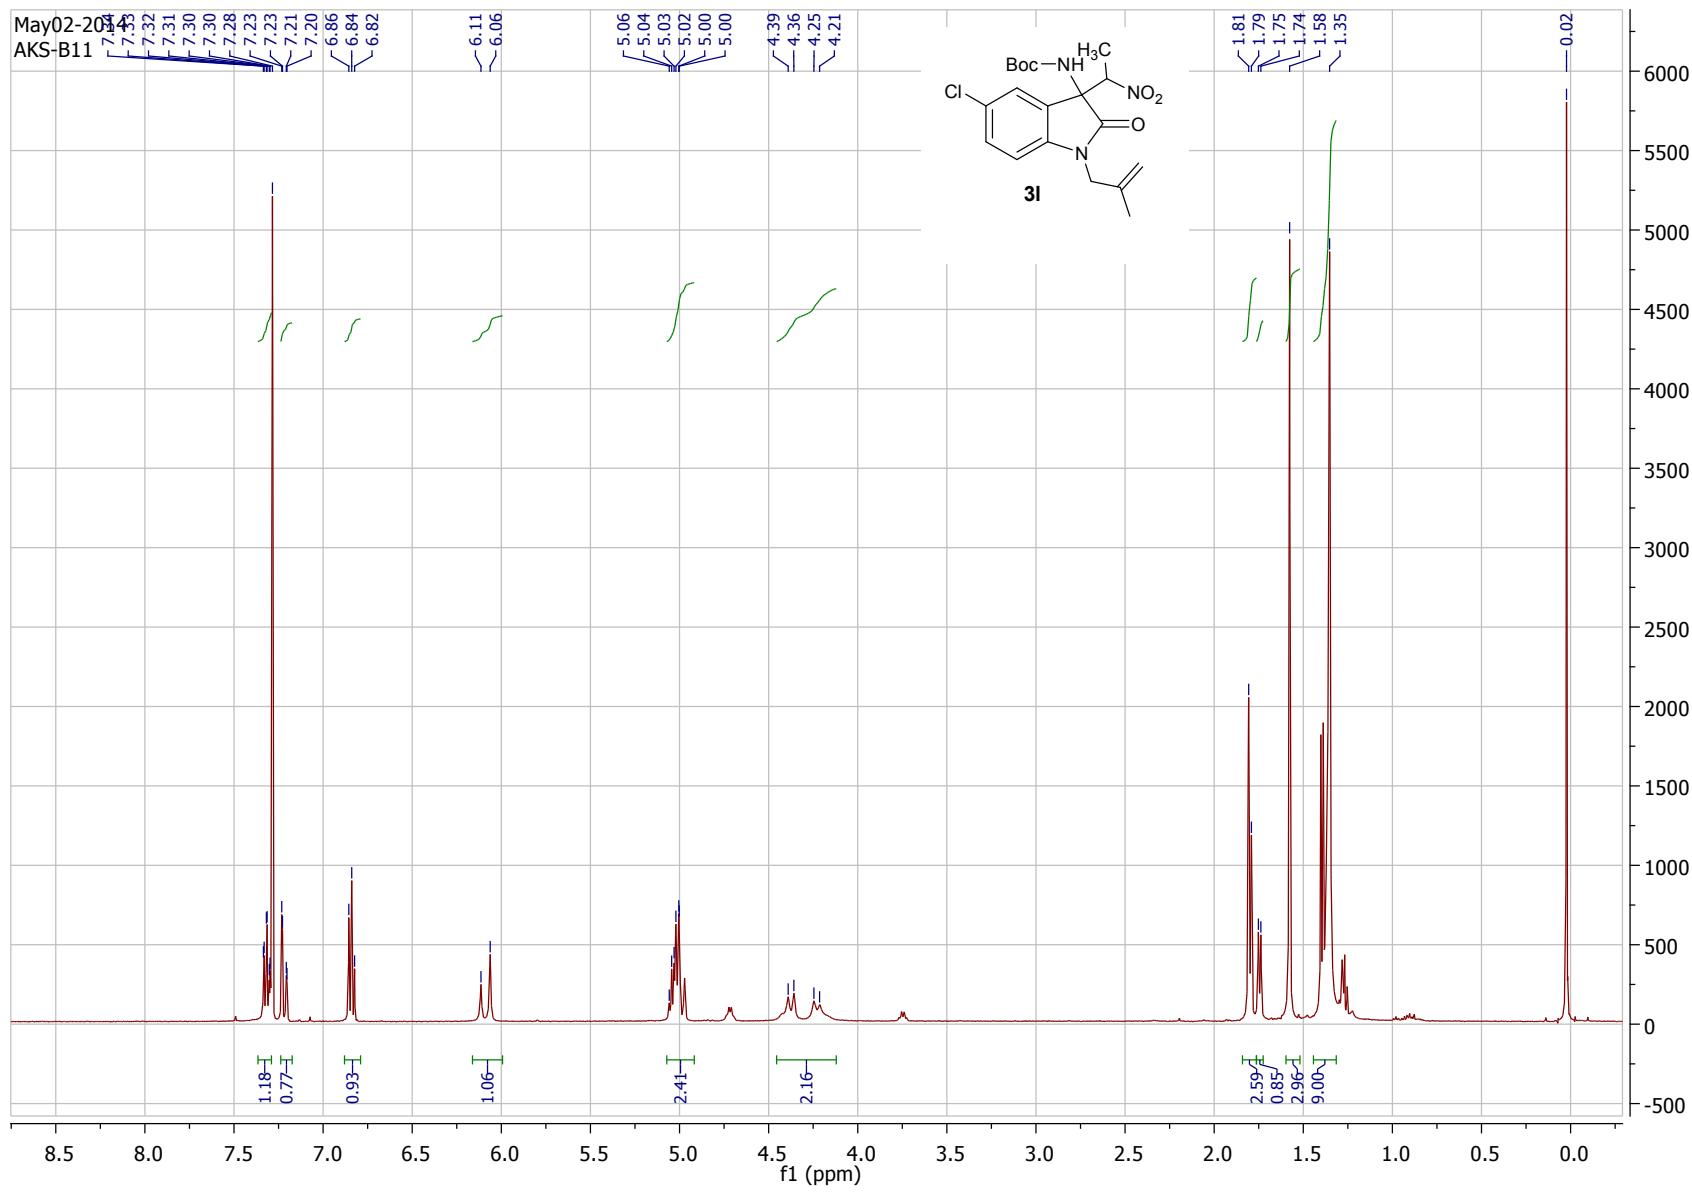

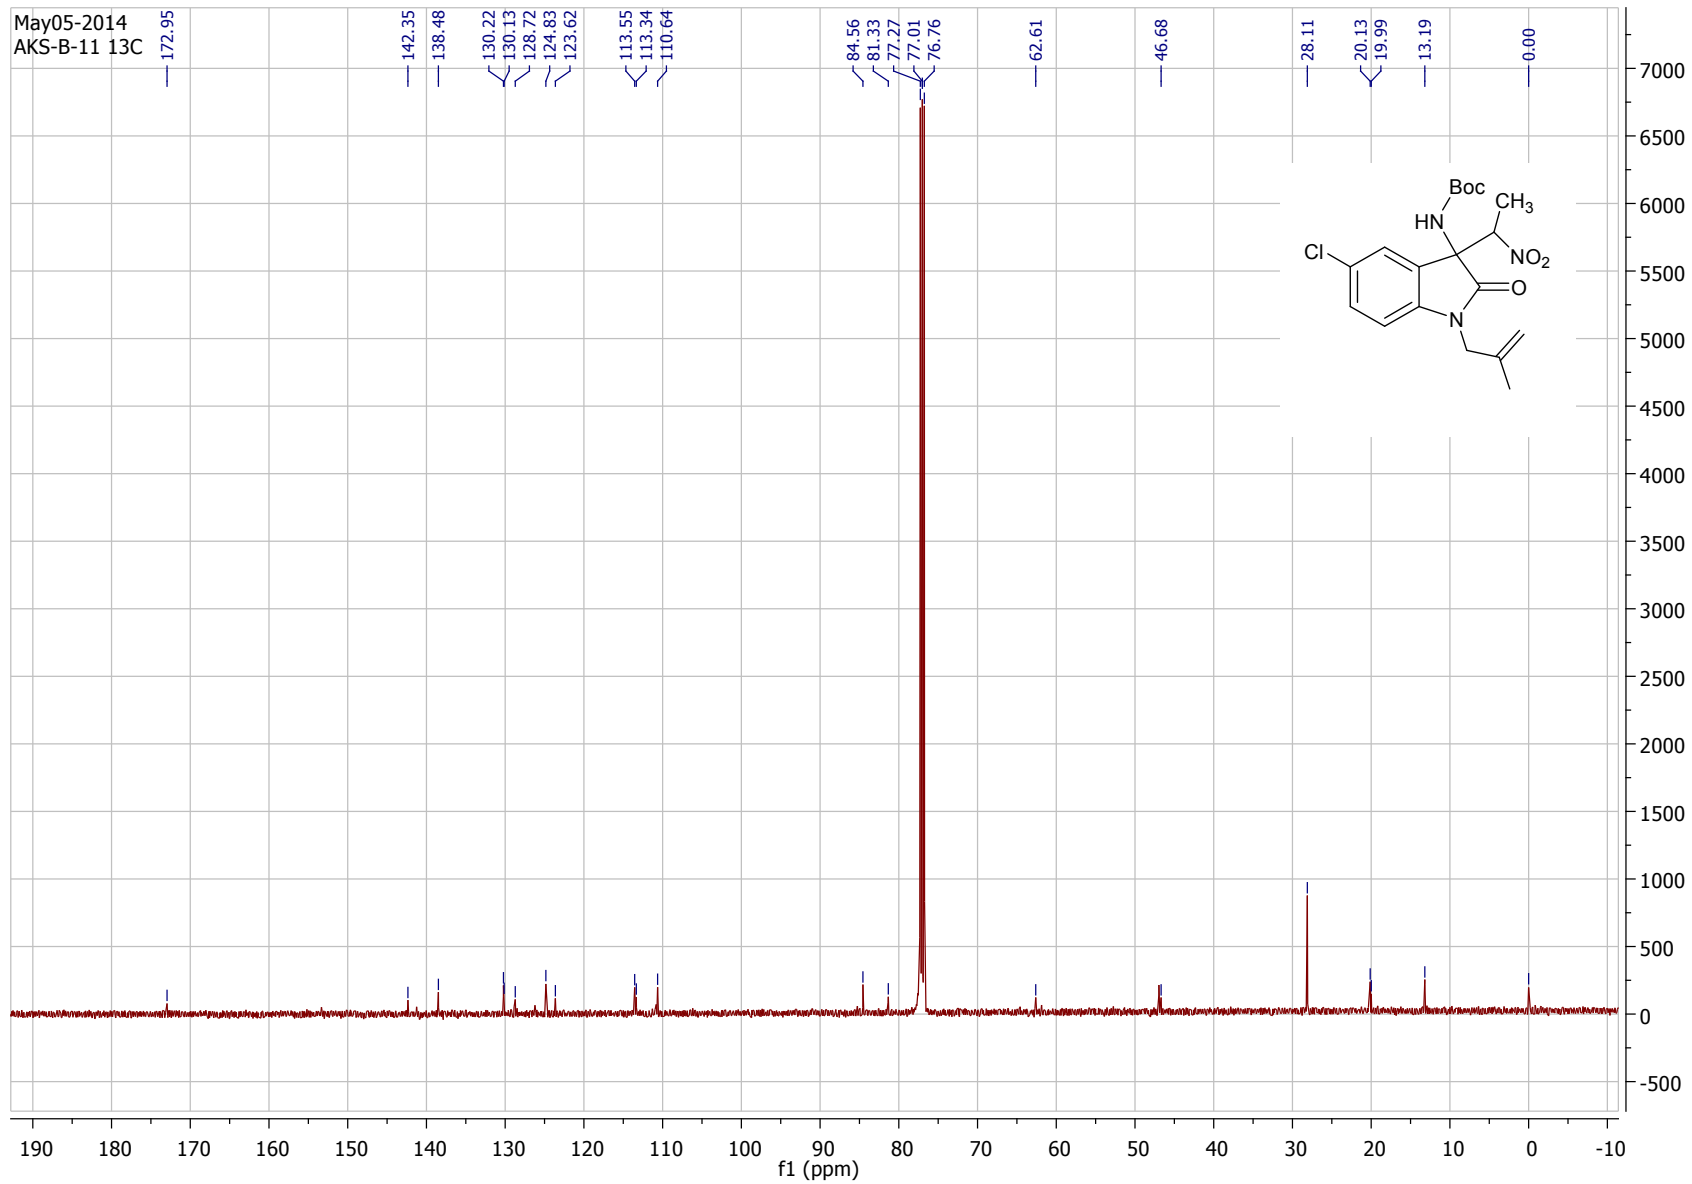

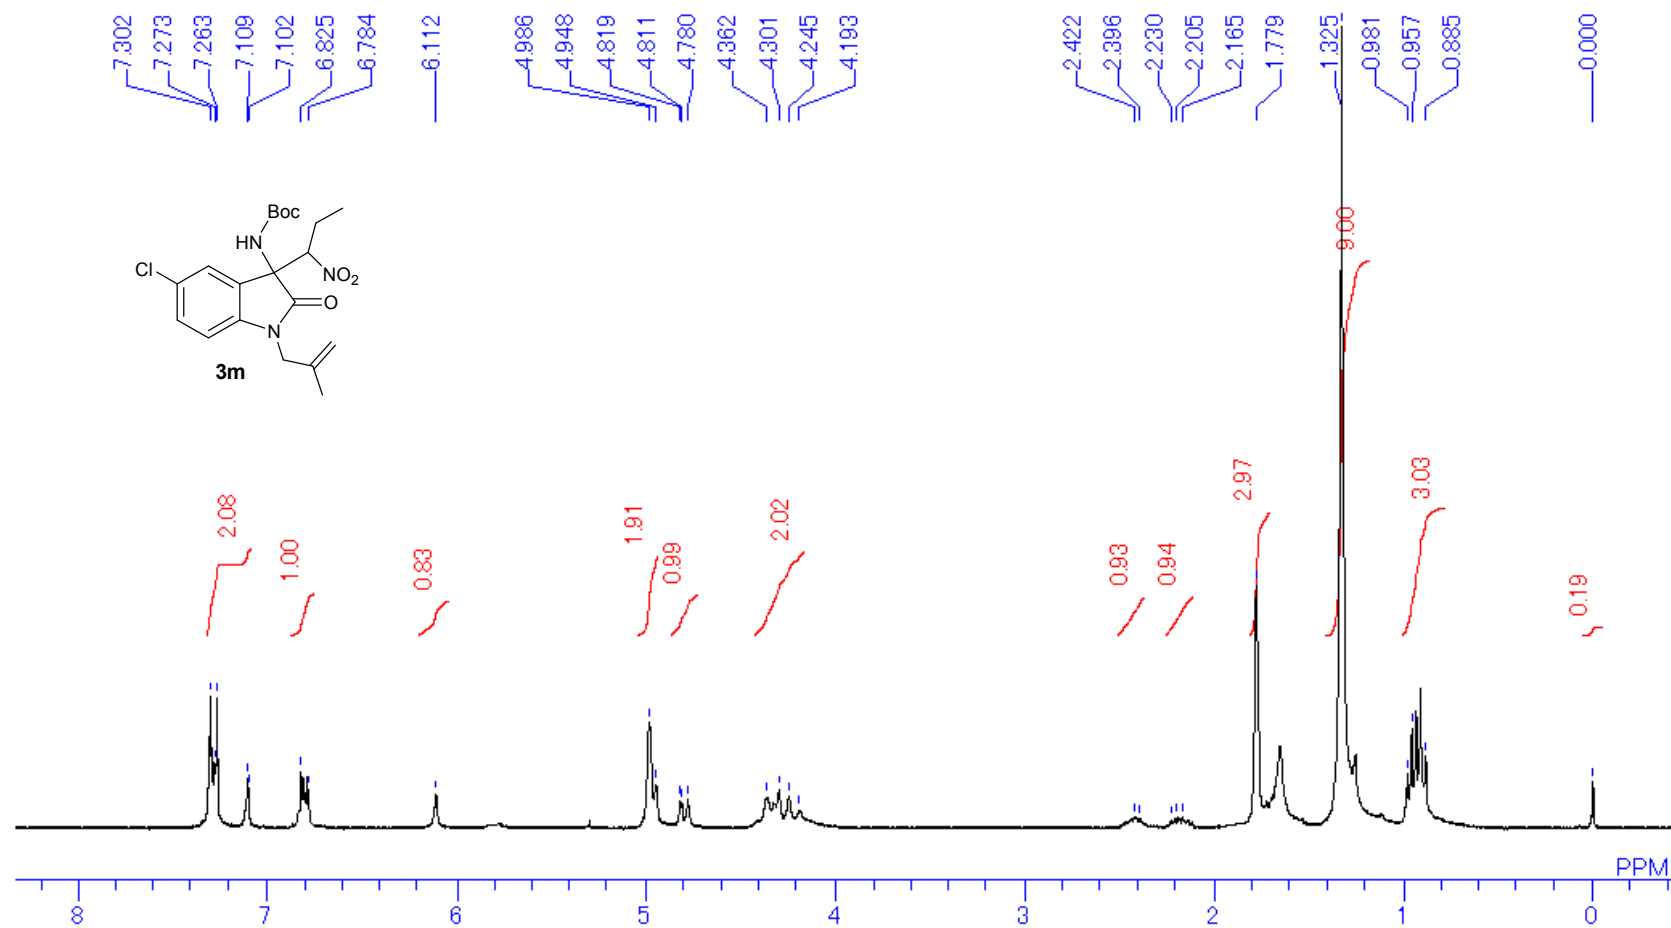



AKS-B15

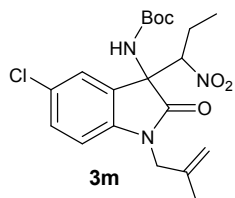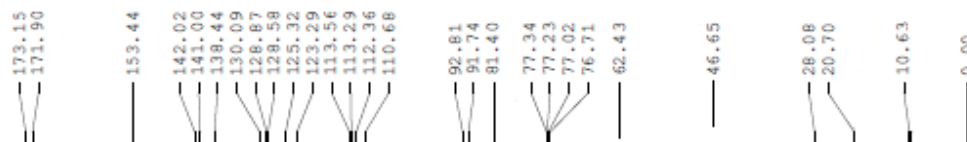

BRUKER  
AVANCE II 400 NMR  
Spectrometer  
SAIF  
Panjab University  
Chandigarh

Current Data Parameters  
NAME Jan24-2014-Administrato  
EXPNO 211  
PROCNO 1

F2 - Acquisition Parameters  
Date\_ 20140125  
Time 5.31  
INSTRUM spect  
PROBHD 5 mm PABBO BB-  
PULPROG zgpg30  
TD 65536  
SOLVENT CDCl3  
NS 512  
DS 4  
SWH 29761.904 Hz  
FIDRES 0.454131 Hz  
AQ 1.1010548 sec  
RG 575  
DW 16.800 usac  
DE 6.00 usac  
TE 295.1 K  
D1 2.00000000 sec  
d11 0.03000000 sec  
DELTA 1.89999998 sec  
TD0 1

==== CHANNEL f1 =====  
NUC1 13C  
P1 9.60 usac  
PL1 -2.00 dB  
SFO1 100.6228298 MHz

==== CHANNEL f2 =====  
CPDPRG2 waltz16  
NUC2 1H  
PCPD2 80.00 usac  
PL2 -3.00 dB  
PL12 14.31 dB  
PL13 18.00 dB  
SFO2 400.1316005 MHz

F2 - Processing parameters  
SI 32768  
SF 100.6127699 MHz  
WDW EM  
SSB 0  
LB 1.00 Hz  
GB 0  
PC 1.40

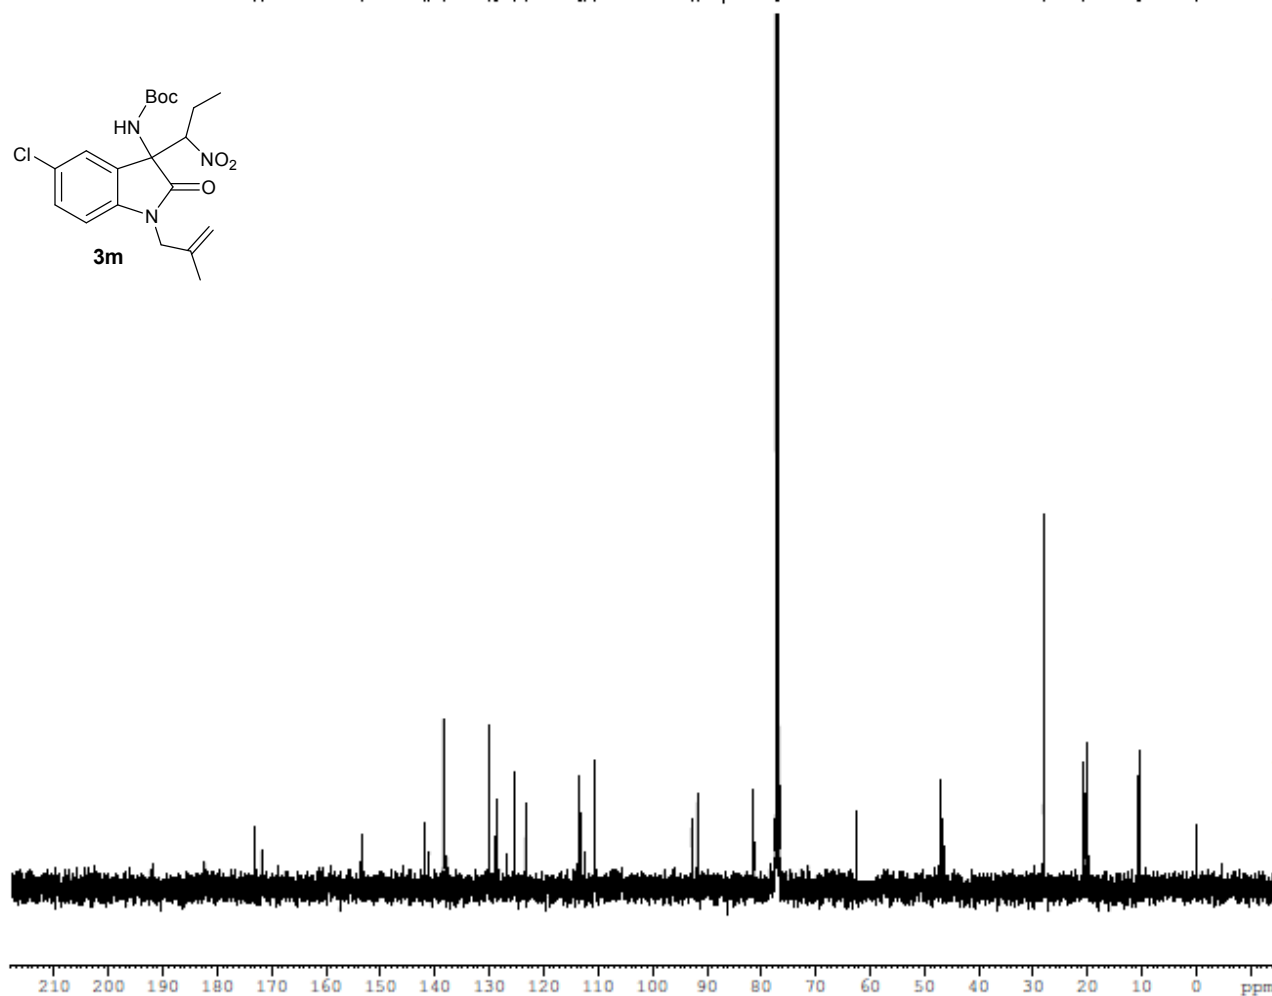

avtar\_saiipu@yahoo.co.in

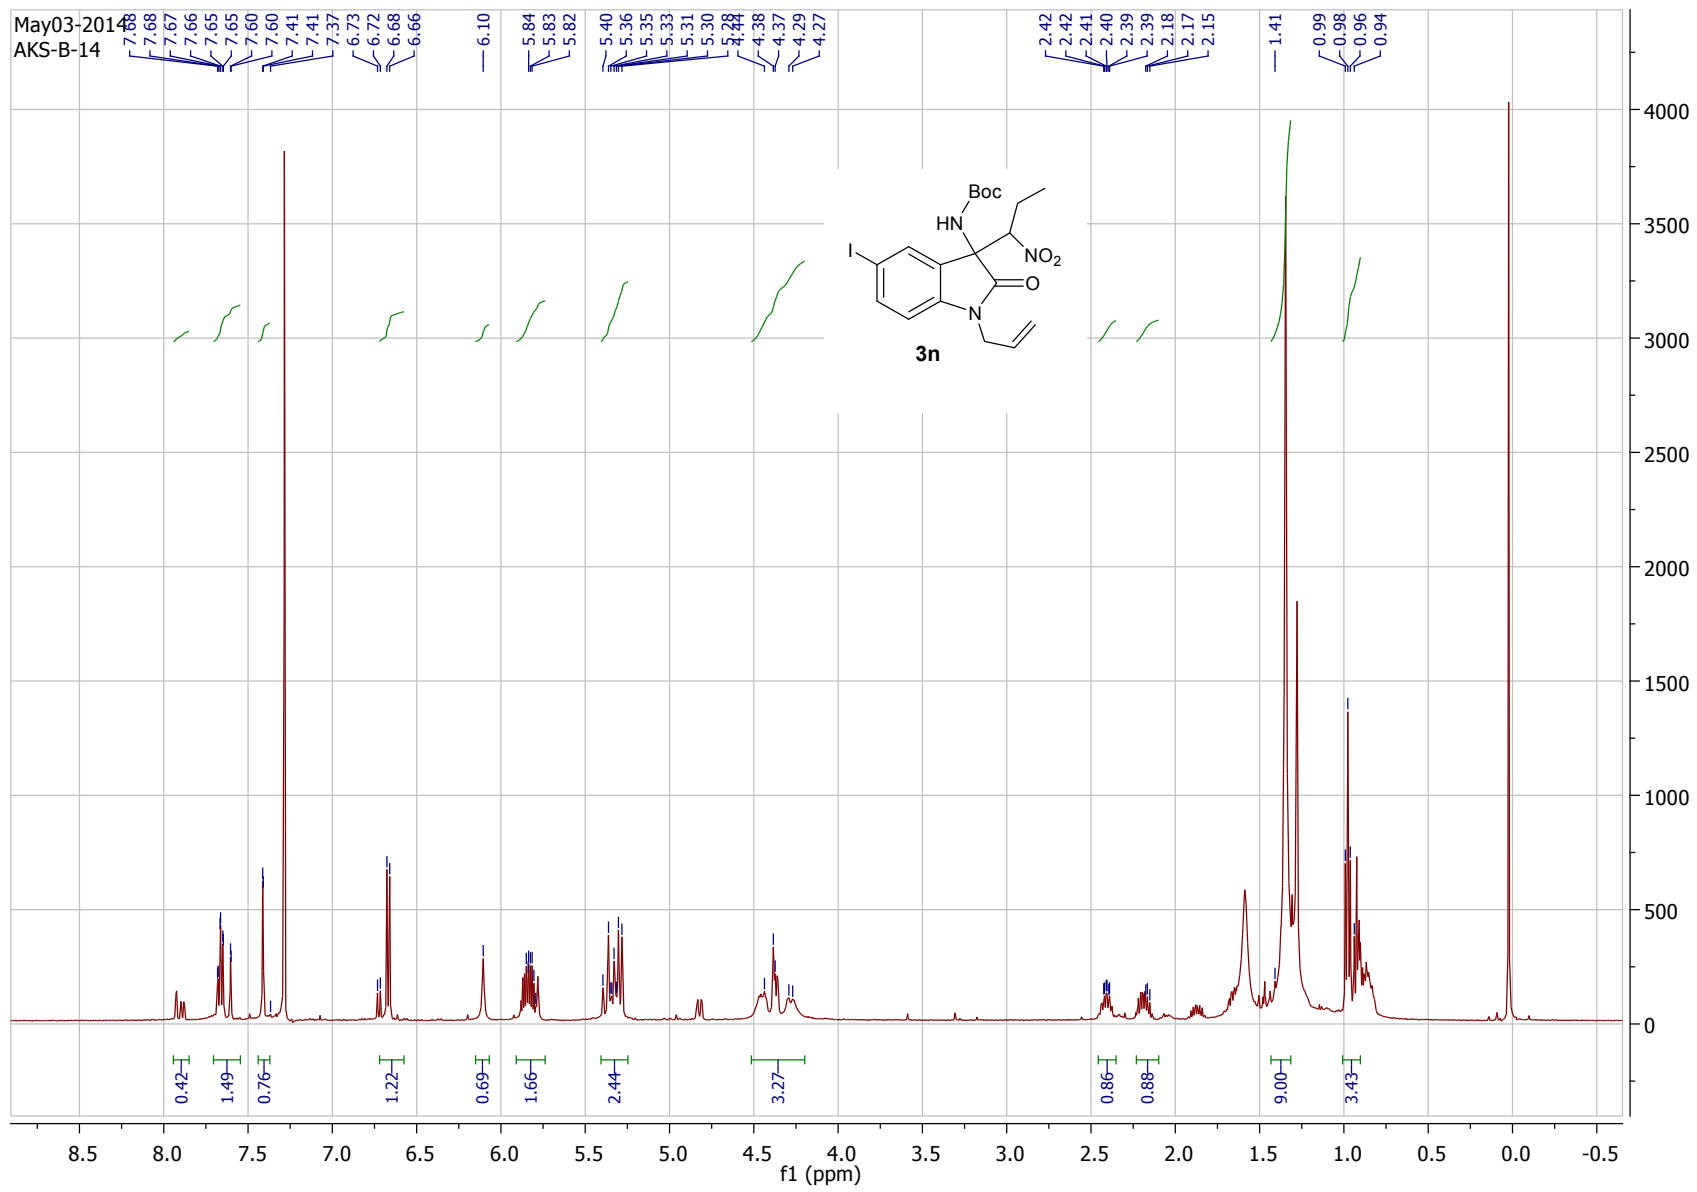

AKS-B14

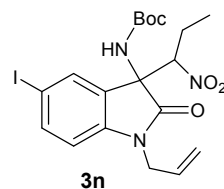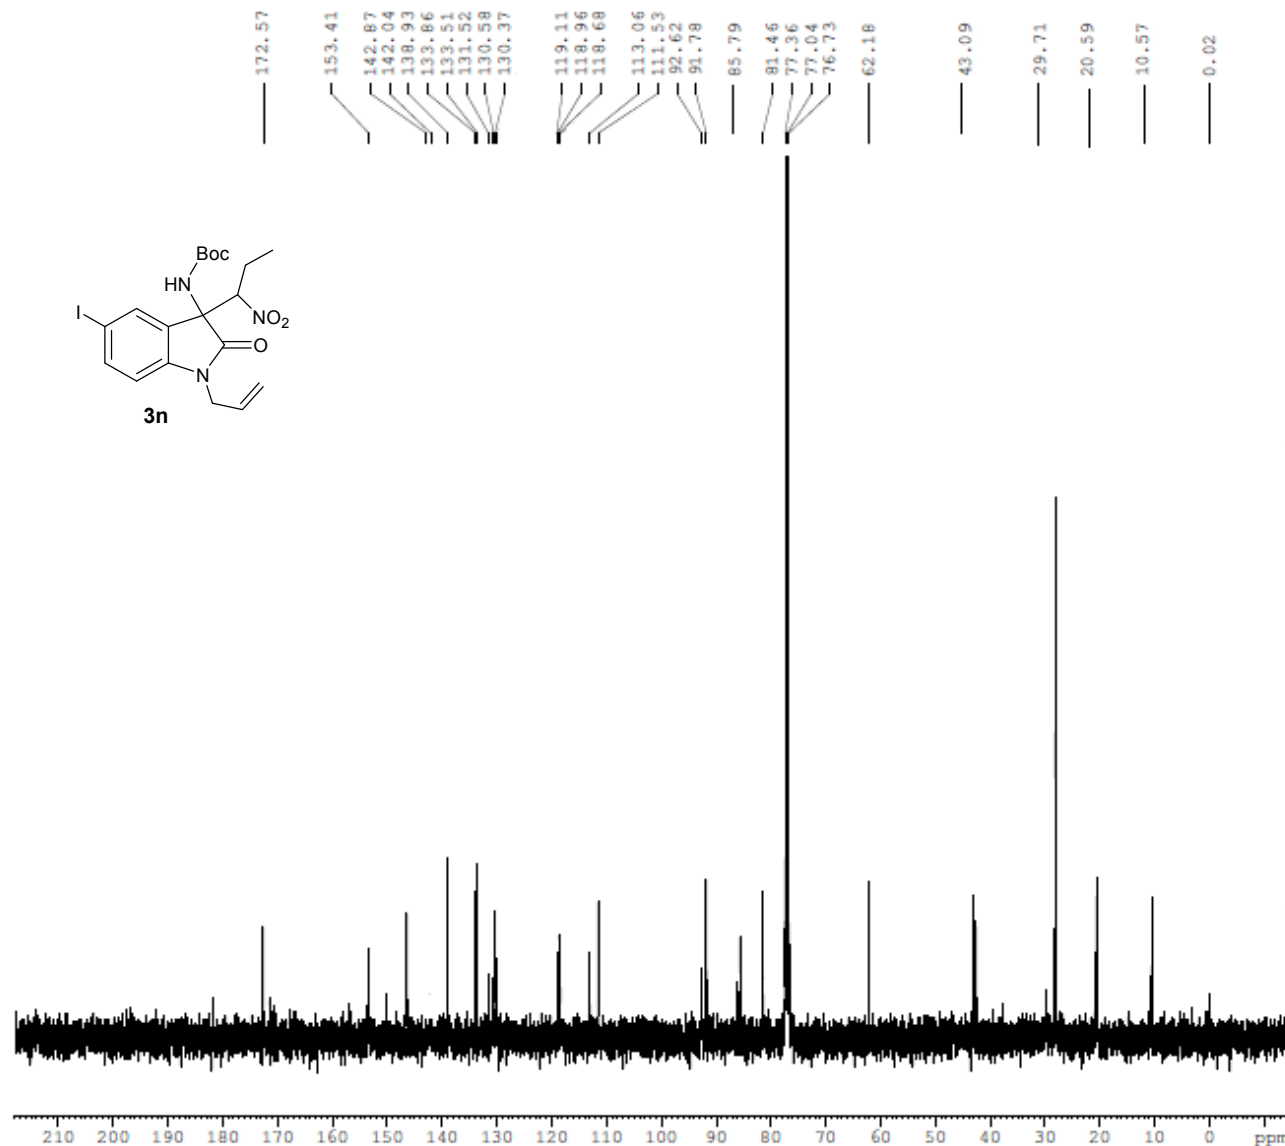

BRUKER  
AVANCE II 400 NMR  
Spectrometer  
SAIF  
Panjab University  
Chandigarh

Current Data Parameters  
NAME Jan24-2014-Administrator  
EXPNO 201  
PROCNO 1

F2 - Acquisition Parameters  
Date\_ 20140125  
Time 4.58  
INSTRUM spect  
PROBHD 5 mm PABBO BB-  
PULPROG zgpg30  
TD 65536  
SOLVENT CDCl3  
NS 512  
DS 4  
SWH 29761.904 Hz  
FIDRES 0.454131 Hz  
AQ 1.1010548 sec  
RG 812  
DW 16.800 usec  
DE 6.00 usec  
TE 294.9 K  
D1 2.00000000 sec  
d11 0.03000000 sec  
DELTA 1.89999998 sec  
TD0 1

==== CHANNEL f1 =====  
NUC1 13C  
P1 9.60 usec  
PL1 -2.00 dB  
SFO1 100.6228298 MHz

==== CHANNEL f2 =====  
CPDPRG2 waltz16  
NUC2 1H  
PCPD2 90.00 usec  
PL2 -3.00 dB  
PL12 14.31 dB  
PL13 18.00 dB  
SFO2 400.1316005 MHz

F2 - Processing parameters  
SI 32768  
SF 100.6127690 MHz  
WDW EM  
SSB 0  
LB 1.00 Hz  
GB 0  
PC 1.40

avtar\_saifpu@yahoo.co.in
